# Supplementary material for: Synthesis, structure and catalysis of a NHC–Pd(ii) complex based on a tetradentate mixed ligand
Source: Royal Society of Chemistry journal article supplement (doi:10.1039/c5ra11089k), 2015-01-01
Supplement: c5ra11089k1.pdf [file c5ra11089k1.pdf]

## Supplementary Information

### Synthesis, Structure and Catalysis of NHC-Pd(II) Complex Based on Tetradentate Mixed Ligand

Qing-Xiang Liu\*, Kang-Qing Cai, Zhi-Xiang Zhao

*Tianjin Key Laboratory of Structure and Performance for Functional Molecules; Key Laboratory of Inorganic-Organic Hybrid Functional Material Chemistry, Ministry of Education; College of Chemistry, Tianjin Normal University, Tianjin 300387, China.*

*\* Corresponding author, E-mail: tjnulqx@163.com*

#### List of the contents

1. The figures for the crystal packings of complex **1**
2. Optimization of the reaction conditions for the Suzuki-Miyaura, Heck-Mizoroki and Sonogashira reactions (Table S1-Table S3)
3. The comparison of the reaction conditions between the present paper and literatures in three types of C-C coupling reactions (Table S4)
4. The data of  $^1\text{H}$  NMR and  $^{13}\text{C}$  NMR spectra for all coupling products in Suzuki-Miyaura, Heck-Mizoroki and Sonogashira reactions
5. The figures of  $^1\text{H}$  NMR and  $^{13}\text{C}$  NMR spectra for all intermediates, precursors [(S)-**LH**<sub>2</sub>] $\cdot$ (PF<sub>6</sub>)<sub>2</sub>, complex **1**, and all coupling products in Suzuki-Miyaura, Heck-Mizoroki and Sonogashira reactions

## 1. The figures for the crystal packings of complex 1

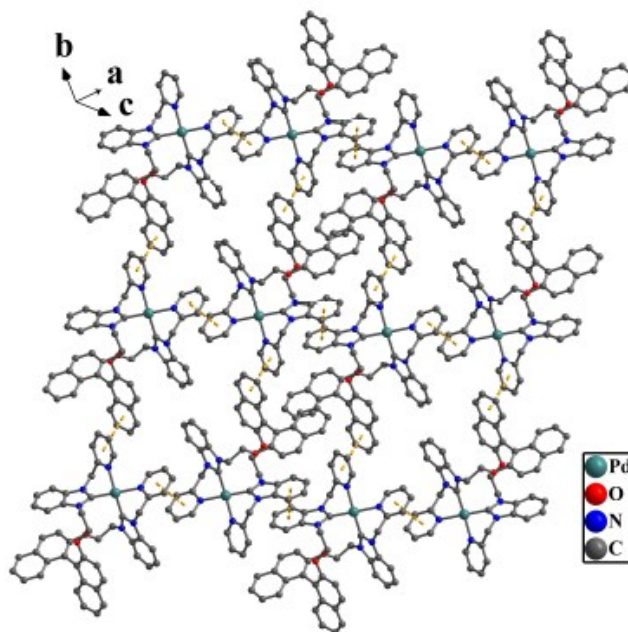

**Figure S1.** 2D supramolecular layer of complex **1** via  $\pi \cdots \pi$  contacts. All hydrogen atoms were omitted for clarity.

## 2. Optimization of the reaction conditions for the Suzuki-Miyaura, Heck-Mizoroki and Sonogashira reactions (Table S1-Table S3)

**Table S1** Suzuki-Miyaura reaction of 4-bromotoluene with phenylboronic acid catalyzed by complex **1**<sup>[a]</sup>

| Entry | Base                                              | Solvent                                                 | Time (h) <sup>[b]</sup> | Ancillary catalysts | Yields (%) <sup>[c]</sup> |
|-------|---------------------------------------------------|---------------------------------------------------------|-------------------------|---------------------|---------------------------|
| 1     | K <sub>2</sub> CO <sub>3</sub>                    | H <sub>2</sub> O                                        | 12                      | -                   | 97%                       |
| 2     | K <sub>2</sub> CO <sub>3</sub>                    | MeOH/H <sub>2</sub> O (1:1)                             | 6                       | -                   | 98%                       |
| 3     | K <sub>2</sub> CO <sub>3</sub>                    | MeOH                                                    | 12                      | -                   | 80%                       |
| 4     | K <sub>2</sub> CO <sub>3</sub>                    | C <sub>2</sub> H <sub>5</sub> OH                        | 12                      | -                   | 25%                       |
| 5     | K <sub>2</sub> CO <sub>3</sub>                    | 1,4-dioxane                                             | 12                      | -                   | 40%                       |
| 6     | K <sub>2</sub> CO <sub>3</sub>                    | THF                                                     | 12                      | -                   | 7%                        |
| 7     | K <sub>2</sub> CO <sub>3</sub>                    | C <sub>2</sub> H <sub>5</sub> OH/H <sub>2</sub> O (1:1) | 12                      | -                   | 72%                       |
| 8     | <sup>t</sup> BuOK                                 | H <sub>2</sub> O                                        | 12                      | -                   | 72%                       |
| 9     | K <sub>3</sub> PO <sub>4</sub> ·3H <sub>2</sub> O | H <sub>2</sub> O                                        | 12                      | -                   | 74%                       |

|    |                                |                  |    |         |     |
|----|--------------------------------|------------------|----|---------|-----|
| 10 | NaOAc                          | H <sub>2</sub> O | 12 | -       | 52% |
| 11 | K <sub>2</sub> CO <sub>3</sub> | H <sub>2</sub> O | 6  | TBAB    | 99% |
| 12 | K <sub>2</sub> CO <sub>3</sub> | H <sub>2</sub> O | 6  | PEG-400 | 94% |
| 13 | K <sub>2</sub> CO <sub>3</sub> | MeOH             | 6  | PEG-400 | 93% |
| 14 | K <sub>2</sub> CO <sub>3</sub> | MeOH             | 6  | TBAB    | 97% |

[a] Reaction conditions: 4-bromotoluene (0.5 mmol), phenylboronic acid (0.6 mmol), base (1.2 mmol), PEG-400 (10 mol%), TBAB (10 mol%), complex **1** 0.1 mol%, solvent (6.0 mL) at 40 °C and in air .

[b] Monitored by TLC.

[c] Determined by a GC method using n-tridecane as internal standard, and using 4-bromotoluene as a standard.

**Table S2** Heck-Mizoroki reaction of bromobenzene with styrene catalyzed by NHC-Pd(II) complex **1**<sup>[a]</sup>

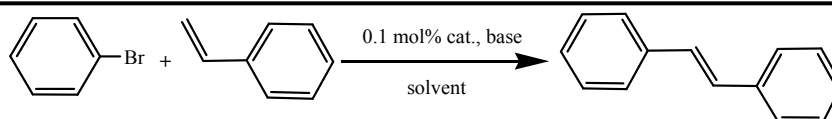

| Entry | Solvent            | Base                                              | T (°C) | Ancillary catalysts | Time (h) <sup>[b]</sup> | Yield (%) <sup>[c]</sup> |
|-------|--------------------|---------------------------------------------------|--------|---------------------|-------------------------|--------------------------|
| 1     | 1,4-dioxane        | NaOAc                                             | 120    | -                   | 24                      | 92                       |
| 2     | 1,4-dioxane        | K <sub>2</sub> CO <sub>3</sub>                    | 120    | -                   | 24                      | 65                       |
| 3     | 1,4-dioxane        | K <sub>3</sub> PO <sub>4</sub> ·3H <sub>2</sub> O | 120    | -                   | 24                      | 78                       |
| 4     | 1,4-dioxane        | Et <sub>3</sub> N                                 | 120    | -                   | 24                      | 15                       |
| 5     | 1,4-dioxane        | <sup>t</sup> BuOK                                 | 120    | -                   | 24                      | 36                       |
| 6     | 1,4-dioxane        | KOH                                               | 120    | -                   | 24                      | 25                       |
| 7     | 1,4-dioxane        | NaHCO <sub>3</sub>                                | 120    | -                   | 24                      | 83                       |
| 8     | 1,4-dioxane        | Cs <sub>2</sub> CO <sub>3</sub>                   | 120    | -                   | 24                      | 39                       |
| 9     | H <sub>2</sub> O   | NaOAc                                             | 120    | -                   | 24                      | Trace                    |
| 10    | DMF                | NaOAc                                             | 120    | -                   | 24                      | 45                       |
| 11    | CH <sub>3</sub> CN | NaOAc                                             | 120    | -                   | 24                      | 14                       |
| 12    | THF                | NaOAc                                             | 120    | -                   | 24                      | 27                       |
| 13    | DME                | NaOAc                                             | 120    | -                   | 24                      | 52                       |
| 14    | DMSO               | NaOAc                                             | 120    | -                   | 24                      | 11                       |
| 15    | 1,4-dioxane        | NaOAc                                             | 100    | -                   | 30                      | 61                       |
| 16    | 1,4-dioxane        | NaOAc                                             | 100    | PEG-400             | 24                      | 95                       |
| 17    | 1,4-dioxane        | NaOAc                                             | 100    | TBAB                | 24                      | 90                       |

[a] Reaction conditions: bromobenzene (0.5 mmol), styrene (0.6 mmol), base (1.2 mmol), complex **1** (0.1 mol%), PEG-400 (10 mol%), TBAB (10 mol%), solvent (6 mL) in air.

[b] Monitored by TLC.

[c] Isolated yield using bromobenzene as a standard.

**Table S3** Sonogashira reaction of 4-bromoanisole with phenylacetylene catalyzed by NHC-Pd(II) complex **1**<sup>[a], [b]</sup>

COc1ccc(Br)cc1 + C#Cc1ccccc1
 $\xrightarrow[\text{solvent, 24 h}]{0.1 \text{ mol\% cat., base}}$ 
COc1ccc(C#Cc2ccccc2)cc1

| Entry | Solvent                            | Base                                              | Ancillary catalysts | Yield (%) <sup>[c]</sup> |
|-------|------------------------------------|---------------------------------------------------|---------------------|--------------------------|
| 1     | 1,4-dioxane/H <sub>2</sub> O (1:1) | K <sub>3</sub> PO <sub>4</sub> ·3H <sub>2</sub> O | -                   | 79                       |
| 2     | 1,4-dioxane/H <sub>2</sub> O (1:1) | K <sub>3</sub> PO <sub>4</sub> ·3H <sub>2</sub> O | TBAB                | 93                       |
| 3     | 1,4-dioxane                        | Cs <sub>2</sub> CO <sub>3</sub>                   | -                   | 35                       |
| 4     | DMF                                | Cs <sub>2</sub> CO <sub>3</sub>                   | -                   | 21                       |
| 5     | DMSO                               | Cs <sub>2</sub> CO <sub>3</sub>                   | -                   | 10                       |
| 6     | CH <sub>3</sub> CN                 | Cs <sub>2</sub> CO <sub>3</sub>                   | -                   | 25                       |
| 7     | H <sub>2</sub> O                   | Cs <sub>2</sub> CO <sub>3</sub>                   | -                   | 29                       |
| 8     | THF                                | Cs <sub>2</sub> CO <sub>3</sub>                   | -                   | trace                    |
| 9     | DMF/H <sub>2</sub> O (1:1)         | Cs <sub>2</sub> CO <sub>3</sub>                   | -                   | 53                       |
| 10    | 1,4-dioxane/H <sub>2</sub> O (1:1) | Cs <sub>2</sub> CO <sub>3</sub>                   | -                   | 69                       |
| 11    | 1,4-dioxane/H <sub>2</sub> O (1:1) | Cs <sub>2</sub> CO <sub>3</sub>                   | PPh <sub>3</sub>    | 82                       |
| 12    | 1,4-dioxane/H <sub>2</sub> O (1:1) | Cs <sub>2</sub> CO <sub>3</sub>                   | TBAB                | 91                       |
| 13    | 1,4-dioxane/H <sub>2</sub> O (1:1) | K <sub>2</sub> CO <sub>3</sub>                    | TBAB                | 86                       |
| 14    | 1,4-dioxane/H <sub>2</sub> O (1:1) | KOH                                               | TBAB                | 78                       |

|    |                                       |                    |      |    |
|----|---------------------------------------|--------------------|------|----|
| 15 | 1,4-dioxane/H <sub>2</sub> O<br>(1:1) | NaOAc              | TBAB | 70 |
| 16 | 1,4-dioxane/H <sub>2</sub> O<br>(1:1) | Et <sub>3</sub> N  | TBAB | 89 |
| 17 | 1,4-dioxane/H <sub>2</sub> O<br>(1:1) | NaHCO <sub>3</sub> | TBAB | 82 |

[a] Reaction conditions: 4-bromoanisole (0.5 mmol), phenylacetylene (0.6 mmol), base (1.2 mmol), complex **1** (0.1 mol%), TBAB (10 mol%), PPh<sub>3</sub> (10 mol%), solvent (6 mL) at 100 °C in air.

[b] Reactions were monitored by TLC.

[c] Isolated yield using 4-bromoanisole as a standard.

### 3. The comparison of the reaction conditions between the present paper and literatures in three types of C-C coupling reactions

**Table S4** The comparison of the reaction conditions between the present paper and literatures in three types of C-C coupling reactions

| Reaction types |   | catalyst loading (mol%) | T (°C) | solvents                                                                                          | bases                                                                                                                                                                                                        |
|----------------|---|-------------------------|--------|---------------------------------------------------------------------------------------------------|--------------------------------------------------------------------------------------------------------------------------------------------------------------------------------------------------------------|
| Suzuki-Miyaura | a | 0.1                     | 40     | H <sub>2</sub> O                                                                                  | K <sub>2</sub> CO <sub>3</sub>                                                                                                                                                                               |
|                | b | 0.1-5                   | 25-140 | H <sub>2</sub> O, THF, DMA, Dioxane, Toluene, THF/H <sub>2</sub> O, Toluene/EtOH/H <sub>2</sub> O | K <sub>2</sub> CO <sub>3</sub> , KOH, K <sub>3</sub> PO <sub>4</sub> , KO <sup>t</sup> Bu, Cs <sub>2</sub> CO <sub>3</sub> , CsF                                                                             |
| Heck-Mizoroki  | a | 0.1                     | 100    | Dioxane                                                                                           | NaOAc                                                                                                                                                                                                        |
|                | b | 0.1-3                   | 80-150 | DMSO, DMA, H <sub>2</sub> O                                                                       | DMF, NaOAc, Na <sub>2</sub> CO <sub>3</sub> , NaHCO <sub>3</sub> , K <sub>3</sub> PO <sub>4</sub> , K <sub>2</sub> CO <sub>3</sub> , KHCO <sub>3</sub> , Cs <sub>2</sub> CO <sub>3</sub> , Et <sub>3</sub> N |
| Sonogashira    | a | 0.1                     | 100    | Dioxane/H <sub>2</sub> O                                                                          | K <sub>3</sub> PO <sub>4</sub>                                                                                                                                                                               |
|                | b | 1-4                     | 80-120 | DMSO, Dioxane, DMA/H <sub>2</sub> O                                                               | DMF, DMF/H <sub>2</sub> O, K <sub>3</sub> PO <sub>4</sub> , K <sub>2</sub> CO <sub>3</sub> , Cs <sub>2</sub> CO <sub>3</sub> , Et <sub>3</sub> N                                                             |

a: the data of the present paper; b: the data of literatures.

### 4. The data of <sup>1</sup>H NMR and <sup>13</sup>C NMR spectra for all coupling products in the

### Suzuki-Miyaura, Heck-Mizoroki and Sonogashira reactions

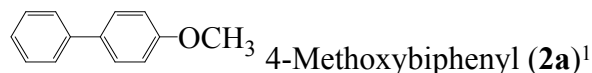

<sup>1</sup>H NMR (400 MHz, CDCl<sub>3</sub>):  $\delta$  3.84 (s, 3H, CH<sub>3</sub>), 6.98 (d,  $J$  = 8.4 Hz, 2H, ArH), 7.29 (t,  $J$  = 7.4 Hz, 1H, ArH), 7.41 (t,  $J$  = 7.6 Hz, 2H, ArH), 7.55 (t,  $J$  = 8.4 Hz, 4H, ArH).

<sup>13</sup>C NMR (100 MHz, CDCl<sub>3</sub>):  $\delta$  55.3 (CH<sub>3</sub>), 114.2 (ArC), 126.7 (ArC), 128.1 (ArC), 128.7 (ArC), 133.7 (ArC), 140.8 (ArC), 159.1 (ArC).

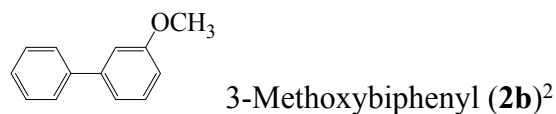

<sup>1</sup>H NMR (400 MHz, CDCl<sub>3</sub>):  $\delta$  3.83 (s, 3H, CH<sub>3</sub>), 6.89 (d,  $J$  = 8.0 Hz, 1H, ArH), 7.12 (d,  $J$  = 1.6 Hz, 1H, ArH), 7.18 (d,  $J$  = 7.6 Hz, 1H, ArH), 7.35 (m, 2H, ArH), 7.41 (t,  $J$  = 7.6 Hz, 2H, ArH), 7.58 (d,  $J$  = 7.6 Hz, 2H, ArH). <sup>13</sup>C NMR (100 MHz, CDCl<sub>3</sub>):  $\delta$  55.2 (CH<sub>3</sub>), 112.6 (ArC), 112.9 (ArC), 119.6 (ArC), 127.1 (ArC), 127.3 (ArC), 128.7 (ArC), 129.7 (ArC), 141.0 (ArC), 142.7 (ArC), 159.9 (ArC).

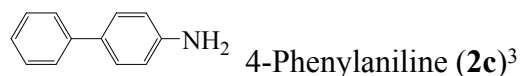

<sup>1</sup>H NMR (400 MHz, CDCl<sub>3</sub>):  $\delta$  3.67 (s, 2H, NH<sub>2</sub>), 6.73 (d,  $J$  = 8.4 Hz, 2H, ArH), 7.25 (d,  $J$  = 7.2 Hz, 1H, ArH), 7.41 (m, 4H, ArH), 7.53 (d,  $J$  = 7.2 Hz, 2H, ArH). <sup>13</sup>C NMR (100 MHz, CDCl<sub>3</sub>):  $\delta$  115.3 (ArC), 126.2 (ArC), 126.3 (ArC), 127.9 (ArC), 128.6 (ArC), 131.5 (ArC), 141.1 (ArC), 145.8 (ArC).

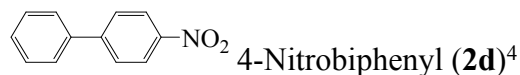

<sup>1</sup>H NMR (400 MHz, CDCl<sub>3</sub>):  $\delta$  7.51 (m, 3H, ArH), 7.64 (t,  $J$  = 4.2 Hz, 2H, ArH), 7.75 (d,  $J$  = 8.8 Hz, 2H, ArH), 8.31 (d,  $J$  = 8.8 Hz, 2H, ArH). <sup>13</sup>C NMR (100 MHz, CDCl<sub>3</sub>):  $\delta$  124.1 (ArC), 127.3 (ArC), 127.8 (ArC), 128.9 (ArC), 129.1 (ArC), 138.7 (ArC), 147.1 (ArC), 147.6 (ArC).

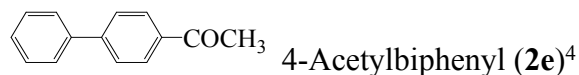

$^1\text{H}$  NMR (400 MHz,  $\text{CDCl}_3$ ):  $\delta$  2.64 (s, 3H,  $\text{CH}_3$ ), 7.40 (t,  $J = 7.2$  Hz, 1H, ArH), 7.47 (t,  $J = 7.6$  Hz, 2H, ArH), 7.62 (d,  $J = 7.2$  Hz, 2H, ArH), 7.70 (d,  $J = 8.4$  Hz, 2H, ArH), 8.04 (d,  $J = 8.4$  Hz, 2H, ArH).  $^{13}\text{C}$  NMR (100 MHz,  $\text{CDCl}_3$ ):  $\delta$  26.6 ( $\text{CH}_3$ ), 127.24 (ArC), 127.28 (ArC), 128.2 (ArC), 128.92 (ArC), 128.96 (ArC), 135.8 (ArC), 139.8 (ArC), 145.8 (ArC), 197.7 (CO).

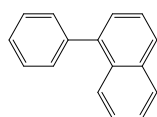

1-Phenylnaphthalene (**2f**)<sup>2</sup>

$^1\text{H}$  NMR (400 MHz,  $\text{CDCl}_3$ ):  $\delta$  7.51 (m, 3H, ArH), 7.62 (m, 6H, ArH), 7.92 (d,  $J = 8.4$  Hz, 1H, ArH), 8.00 (q,  $J = 4.0$  Hz, 2H, ArH).  $^{13}\text{C}$  NMR (100 MHz,  $\text{CDCl}_3$ ):  $\delta$  125.4 (ArC), 125.8 (ArC), 126.0 (ArC), 126.9 (ArC), 127.23 (ArC), 127.29 (ArC), 127.6 (ArC), 128.3 (ArC), 128.8 (ArC), 130.1 (ArC), 131.6 (ArC), 133.8 (ArC), 140.3 (ArC), 140.8 (ArC).

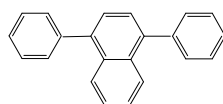

1,4-Diphenylnaphthalene (**2g**)<sup>5</sup>

$^1\text{H}$  NMR (400 MHz,  $\text{CDCl}_3$ ):  $\delta$  7.52 (m, 6H, ArH), 7.60 (m, 8H, ArH), 8.02 (q,  $J = 3.3$  Hz, 2H, ArH).  $^{13}\text{C}$  NMR (100 MHz,  $\text{CDCl}_3$ ):  $\delta$  125.8 (ArC), 126.3 (ArC), 126.4 (ArC), 127.2 (ArC), 128.2 (ArC), 130.1 (ArC), 131.9 (ArC), 139.8 (ArC), 140.8 (ArC).

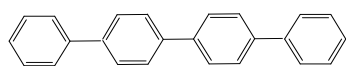

4,4'-Diphenylbiphenyl (**2h**)<sup>6</sup>

$^1\text{H}$  NMR (400 MHz,  $\text{DMSO}-d_6$ ):  $\delta$  7.52 (t,  $J = 7.4$  Hz, 4H, ArH), 7.70 (d,  $J = 4.4$  Hz, 4H, ArH), 7.74 (d,  $J = 7.6$  Hz, 4H, ArH), 7.79 (s, 6H, ArH).  $^{13}\text{C}$  NMR (100 MHz,  $\text{DMSO}-d_6$ ):  $\delta$  126.5 (ArC), 127.0 (ArC), 127.2 (ArC), 127.6 (ArC), 128.6 (ArC), 129.0 (ArC), 131.8 (ArC).

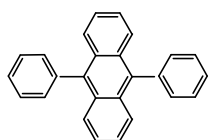

9,10-Diphenylanthracene (**2i**)<sup>7</sup>

<sup>1</sup>H NMR (400 MHz, DMSO-*d*<sub>6</sub>): δ 7.47 (q, *J* = 5.3 Hz, 8H, *ArH*), 7.67 (m, 10H, *ArH*).

<sup>13</sup>C NMR (100 MHz, DMSO-*d*<sub>6</sub>): δ 125.4 (ArC), 126.3 (ArC), 128.6 (ArC), 129.1 (ArC), 130.8 (ArC).

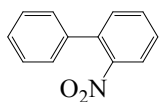

2-Nitrobiphenyl (**2j**)<sup>2</sup>

<sup>1</sup>H NMR (400 MHz, CDCl<sub>3</sub>): δ 7.33 (q, *J* = 3.2 Hz, 2H, *ArH*), 7.50 (m, 5H, *ArH*),

7.63 (m, 1H, *ArH*), 7.86 (q, *J* = 3.0 Hz, 1H, *ArH*). <sup>13</sup>C NMR (100 MHz, CDCl<sub>3</sub>): δ 124.0 (ArC), 127.9 (ArC), 128.1 (ArC), 128.2 (ArC), 128.7 (ArC), 131.9 (ArC), 132.2 (ArC), 136.3 (ArC), 137.3 (ArC), 149.3 (ArC).

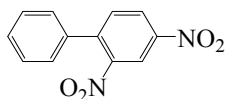

2,4-Dinitrobiphenyl (**2k**)<sup>8</sup>

<sup>1</sup>H NMR (400 MHz, CDCl<sub>3</sub>): δ 7.38 (q, *J* = 3.2 Hz, 2H, *ArH*), 7.52 (t, *J* = 3.2 Hz, 3H,

*ArH*), 7.72 (d, *J* = 8.8 Hz, 1H, *ArH*), 8.51 (q, *J* = 3.6 Hz, 1H, *ArH*), 8.74 (d, *J* = 2.0

Hz, 1H, *ArH*). <sup>13</sup>C NMR (100 MHz, CDCl<sub>3</sub>): δ 119.7 (ArC), 126.4 (ArC), 127.6

(ArC), 129.1 (ArC), 129.5 (ArC), 133.2 (ArC), 135.2 (ArC), 142.2 (ArC), 146.8

(ArC), 149.1 (ArC).

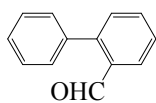

Biphenyl-2-carbaldehyde (**2l**)<sup>4</sup>

<sup>1</sup>H NMR (400 MHz, CDCl<sub>3</sub>): δ 7.33 (m, 7H, *ArH*), 7.56 (q, *J* = 2.9 Hz, 1H, *ArH*),

7.97 (q, *J* = 3.2 Hz, 1H, *ArH*), 10.52 (s, 1H, CHO). <sup>13</sup>C NMR (100 MHz, CDCl<sub>3</sub>): δ

126.5 (ArC), 127.3 (ArC), 128.0 (ArC), 129.4 (ArC), 129.6 (ArC), 129.7 (ArC), 130.6

(ArC), 133.2 (ArC), 135.1 (ArC), 135.3 (ArC), 189.8 (CHO).

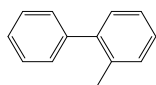

2-Methylbiphenyl (**2m**)<sup>2</sup>

<sup>1</sup>H NMR (400 MHz, CDCl<sub>3</sub>): δ 2.26 (s, 3H, CH<sub>3</sub>), 7.24 (m, 3H, *ArH*), 7.33 (m, 3H,



ArH), 7.43 (m, 3H, ArH).  $^{13}\text{C}$  NMR (100 MHz,  $\text{CDCl}_3$ ):  $\delta$  20.5 ( $\text{CH}_3$ ), 125.8 (ArC), 126.8 (ArC), 127.2 (ArC), 127.3 (ArC), 128.1 (ArC), 128.8 (ArC), 129.2 (ArC), 129.8 (ArC), 130.3 (ArC), 135.3 (ArC), 142.0 (ArC).

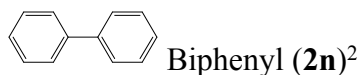

$^1\text{H}$  NMR (400 MHz,  $\text{CDCl}_3$ ):  $\delta$  7.44 (t,  $J = 7.2$  Hz, 2H, ArH), 7.53 (t,  $J = 7.4$  Hz, 4H, ArH), 7.70 (d,  $J = 7.6$  Hz, 4H, ArH).  $^{13}\text{C}$  NMR (100 MHz,  $\text{CDCl}_3$ ):  $\delta$  127.2 (ArC), 127.3 (ArC), 128.8 (ArC), 141.3 (ArC).

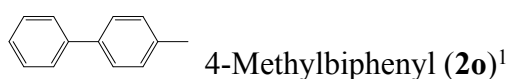

$^1\text{H}$  NMR (400 MHz,  $\text{CDCl}_3$ ):  $\delta$  2.38 (s, 3H,  $\text{CH}_2$ ), 7.24 (d,  $J = 8.0$  Hz, 2H, ArH), 7.30 (t,  $J = 7.4$  Hz, 1H, ArH), 7.40 (t,  $J = 7.6$  Hz, 2H, ArH), 7.47 (d,  $J = 8.0$  Hz, 2H, ArH), 7.55 (d,  $J = 8.4$  Hz, 2H, ArH).  $^{13}\text{C}$  NMR (100 MHz,  $\text{CDCl}_3$ ):  $\delta$  21.1 ( $\text{CH}_3$ ), 127.0 (ArC), 127.2 (ArC), 128.7 (ArC), 129.5 (ArC), 137.0 (ArC), 138.4 (ArC), 141.2 (ArC).

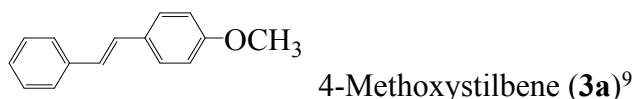

$^1\text{H}$  NMR (400 MHz,  $\text{CDCl}_3$ ):  $\delta$  3.88 (s, 3H,  $\text{CH}_3$ ), 6.97 (d,  $J = 8.8$  Hz, 2H, ArH), 7.06 (d,  $J = 16.0$  Hz, 1H, =CH), 7.12 (d,  $J = 16.0$  Hz, 1H, =CH), 7.30 (t,  $J = 7.2$  Hz, 1H, ArH), 7.41 (t,  $J = 7.6$  Hz, 2H, ArH), 7.56 (q,  $J = 7.7$  Hz, 4H, ArH).  $^{13}\text{C}$  NMR (100 MHz,  $\text{CDCl}_3$ ):  $\delta$  55.2 ( $\text{CH}_3$ ), 114.1 (ArC), 126.2 (ArC), 126.5 (ArC), 127.1 (=CH or ArC), 127.7 (=CH or ArC), 128.1 (ArC), 128.6 (ArC), 130.1 (ArC), 137.6 (ArC), 159.2 (ArC).

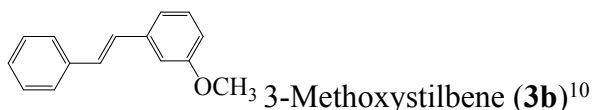

$^1\text{H}$  NMR (400 MHz,  $\text{DMSO}-d_6$ ):  $\delta$  3.80 (s, 3H,  $\text{CH}_3$ ), 6.86 (d,  $J = 7.6$  Hz, 1H, ArH), 7.19 (d,  $J = 6.8$  Hz, 2H, =CH or ArH), 7.31 (m, 4H, =CH or ArH), 7.40 (t,  $J = 7.6$  Hz,

2H, ArH), 7.61 (d,  $J = 7.6$  Hz, 2H, ArH).  $^{13}\text{C}$  NMR (100 MHz, DMSO- $d_6$ ):  $\delta$  55.0 (CH<sub>3</sub>), 111.4 (ArC), 113.4 (ArC), 119.0 (ArC), 119.1 (ArC), 126.4 (ArC), 127.6 (=CH or ArC), 128.3 (ArC), 128.6 (ArC), 129.6 (ArC), 136.9 (ArC), 138.4 (ArC), 159.5 (ArC).

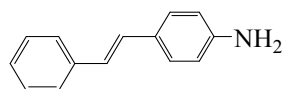

4-Anilinstilbene (**3c**)<sup>11</sup>

$^1\text{H}$  NMR (400 MHz, CDCl<sub>3</sub>):  $\delta$  3.71 (s, 2H, NH<sub>2</sub>), 6.67 (d,  $J = 8.0$  Hz, 2H, ArH), 6.93 (d,  $J = 16.0$  Hz, 1H, =CH), 7.00 (d,  $J = 16.0$  Hz, 1H, =CH), 7.22 (t,  $J = 7.0$  Hz, 1H, ArH), 7.34 (d,  $J = 6.8$  Hz, 4H, ArH), 7.47 (d,  $J = 7.6$  Hz, 2H, ArH).  $^{13}\text{C}$  NMR (100 MHz, CDCl<sub>3</sub>):  $\delta$  115.1 (ArC), 125.0 (ArC), 126.0 (ArC), 126.8 (ArC), 127.7 (=CH or ArC), 127.9 (=CH or ArC), 128.5 (ArC), 128.6 (ArC), 137.9 (ArC), 146.1 (ArC).

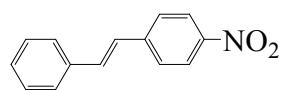

4-Nitrostilbene (**3d**)<sup>12</sup>

$^1\text{H}$  NMR (400 MHz, CDCl<sub>3</sub>):  $\delta$  7.19 (d,  $J = 16.4$  Hz, 1H, =CH), 7.28 (d,  $J = 16.4$  Hz, 1H, =CH), 7.36 (m, 1H, ArH), 7.43 (t,  $J = 7.4$  Hz, 2H, ArH), 7.57 (d,  $J = 7.2$  Hz, 2H, ArH), 7.67 (d,  $J = 8.4$  Hz, 2H, ArH), 8.26 (d,  $J = 8.8$  Hz, 2H, ArH).  $^{13}\text{C}$  NMR (100 MHz, CDCl<sub>3</sub>):  $\delta$  124.1 (ArC), 126.3 (ArC), 126.8 (ArC), 127.0 (=CH or ArC), 128.8 (ArC), 128.9 (ArC), 133.3 (ArC), 136.2 (ArC), 143.8 (ArC), 146.8 (ArC).

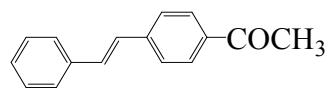

4-Acetylstilbene (**3e**)<sup>13</sup>

$^1\text{H}$  NMR (400 MHz, CDCl<sub>3</sub>):  $\delta$  2.63 (s, 3H, CH<sub>3</sub>), 7.18 (d,  $J = 16.4$  Hz, 1H, =CH), 7.24 (d,  $J = 16.4$  Hz, 1H, =CH), 7.33 (q,  $J = 8.5$  Hz, 1H, ArH), 7.41 (t,  $J = 7.6$  Hz, 2H, ArH), 7.58 (d,  $J = 7.2$  Hz, 2H, ArH), 7.62 (d,  $J = 8.4$  Hz, 2H, ArH), 7.99 (d,  $J = 8.4$  Hz, 2H, ArH).  $^{13}\text{C}$  NMR (100 MHz, CDCl<sub>3</sub>):  $\delta$  26.5 (CH<sub>3</sub>), 126.4 (ArC), 126.8 (ArC), 127.4 (=CH or ArC), 128.3 (ArC), 128.7 (ArC), 128.8 (ArC), 131.4 (ArC), 135.9 (ArC), 136.6 (ArC), 141.9 (ArC), 197.4 (CO).

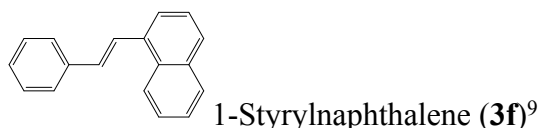

<sup>1</sup>H NMR (400 MHz, CDCl<sub>3</sub>): δ 7.14 (d, *J* = 16.0 Hz, 1H, =CH), 7.27 (t, *J* = 7.4 Hz, 1H, ArH), 7.37 (t, *J* = 7.6 Hz, 2H, ArH), 7.52 (m, 3H, =CH or ArH), 7.57 (d, *J* = 7.6 Hz, 2H, ArH), 7.70 (d, *J* = 7.2 Hz, 1H, ArH), 7.76 (d, *J* = 8.0 Hz, 1H, ArH), 7.84 (q, *J* = 7.2 Hz, 2H, ArH), 8.21 (d, *J* = 8.0 Hz, 1H, ArH). <sup>13</sup>C NMR (100 MHz, CDCl<sub>3</sub>): δ 123.5 (ArC), 123.7 (ArC), 125.6 (ArC), 125.7 (ArC), 125.8 (ArC), 126.0 (ArC), 126.6 (ArC), 127.7 (=CH or ArC), 128.0 (ArC), 128.5 (ArC), 128.7 (ArC), 131.3 (ArC), 131.7 (ArC), 133.6 (ArC), 134.9 (ArC), 137.5 (ArC).

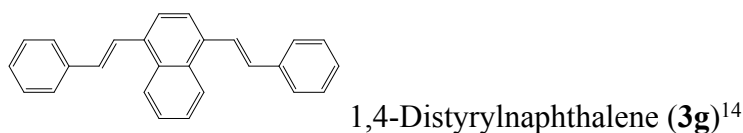

<sup>1</sup>H NMR (400 MHz, CDCl<sub>3</sub>): δ 7.17 (d, *J* = 16.0 Hz, 2H, =CH), 7.29 (t, *J* = 7.4 Hz, 2H, ArH), 7.39 (t, *J* = 7.6 Hz, 4H, ArH), 7.54 (q, *J* = 1.8 Hz, 2H, ArH), 7.59 (d, *J* = 7.2 Hz, 4H, ArH), 7.75 (s, 2H, ArH), 7.86 (d, *J* = 16.0 Hz, 2H, =CH), 8.26 (q, *J* = 3.2 Hz, 2H, ArH). <sup>13</sup>C NMR (100 MHz, CDCl<sub>3</sub>): δ 123.5 (ArC), 124.3 (ArC), 125.7 (ArC), 126.0 (ArC), 126.6 (ArC), 127.7 (=CH or ArC), 128.7 (ArC), 131.5 (ArC), 134.8 (ArC), 137.6 (ArC).

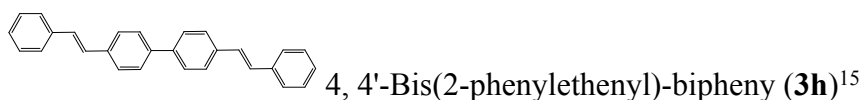

<sup>1</sup>H NMR (400 MHz, CDCl<sub>3</sub>): δ 7.16 (s, 2H, ArH), 7.39 (m, 6H, =CH or ArH), 7.43 (d, *J* = 8.0 Hz, 2H, ArH), 7.55 (t, *J* = 11.2 Hz, 2H, =CH or ArH), 7.62 (t, *J* = 6.0 Hz, 6H, ArH). <sup>13</sup>C NMR (100 MHz, CDCl<sub>3</sub>): δ 126.5 (ArC), 126.6 (ArC), 126.9 (ArC), 127.2 (=CH or ArC), 127.6 (=CH or ArC), 127.7 (ArC), 128.2 (ArC), 128.3 (ArC), 128.71 (ArC), 128.78 (ArC).

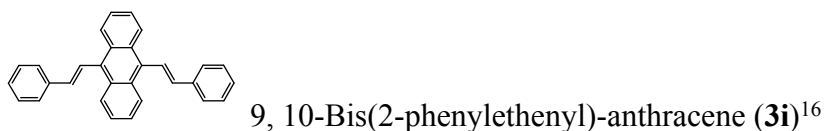

<sup>1</sup>H NMR (400 MHz, DMSO-*d*<sub>6</sub>): δ 7.40 (q, *J* = 2.2 Hz, 4H, ArH), 7.50 (t, *J* = 7.4 Hz, 4H, =CH or ArH), 7.58 (q, *J* = 3.4 Hz, 6H, ArH), 7.84 (d, *J* = 7.2 Hz, 4H, =CH or

ArH), 8.40 (q,  $J = 3.3$  Hz, 4H, ArH).  $^{13}\text{C}$  NMR (100 MHz, DMSO- $d_6$ ):  $\delta$  119.0 (ArC), 121.6 (ArC), 122.3 (ArC), 123.4 (ArC), 123.6 (ArC), 124.0 (ArC), 124.9 (ArC), 125.6 (ArC), 127.3 (=CH or ArC), 129.0 (ArC), 131.5 (ArC), 133.7 (ArC), 136.2 (ArC), 140.6 (ArC), 140.8 (ArC).

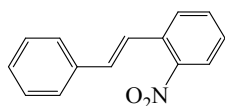

1-Nitro-2-(2-phenylethenyl)-stilbene (**3j**)<sup>17</sup>

$^1\text{H}$  NMR (400 MHz,  $\text{CDCl}_3$ ):  $\delta$  7.16 (d,  $J = 16.4$  Hz, 1H, =CH), 7.25 (d,  $J = 16.4$  Hz, 1H, =CH), 7.33 (t,  $J = 7.2$  Hz, 1H, ArH), 7.40 (t,  $J = 7.4$  Hz, 2H, ArH), 7.54 (d,  $J = 7.2$  Hz, 2H, ArH), 7.64 (d,  $J = 8.8$  Hz, 2H, ArH), 8.21 (d,  $J = 8.8$  Hz, 2H, ArH).  $^{13}\text{C}$  NMR (100 MHz,  $\text{CDCl}_3$ ):  $\delta$  124.3 (ArC), 127.2 (=CH or ArC), 129.0 (ArC), 130.4 (ArC), 130.7 (ArC), 132.2 (ArC), 133.7 (ArC), 136.2 (ArC), 136.3 (ArC), 143.7 (ArC).

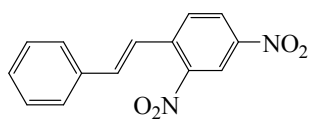

2, 4-Dinitro-1-(2-phenylethenyl)-stilbene (**3k**)<sup>18</sup>

$^1\text{H}$  NMR (400 MHz,  $\text{CDCl}_3$ ):  $\delta$  7.40 (m, 2H, =CH or ArH), 7.54 (m, 6H, =CH or ArH), 8.04 (t,  $J = 4.2$  Hz, 2H, ArH).  $^{13}\text{C}$  NMR (100 MHz,  $\text{CDCl}_3$ ):  $\delta$  121.2 (ArC), 121.8 (ArC), 126.1 (ArC), 128.2 (=CH or ArC), 128.4 (ArC), 128.6 (ArC), 128.7 (ArC), 130.1 (ArC), 131.6 (ArC), 139.7 (ArC), 140.2 (ArC), 159.0 (ArC).

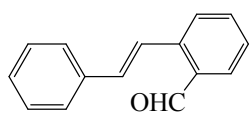

2-(2-Phenylethenyl)-stilbene (**3l**)<sup>19</sup>

$^1\text{H}$  NMR (400 MHz,  $\text{CDCl}_3$ ):  $\delta$  7.06 (d,  $J = 16.4$  Hz, 1H, =CH), 7.06 (d,  $J = 16.4$  Hz, 1H, =CH), 7.16, (d,  $J = 8.0$  Hz, 2H, ArH), 7.23 (t,  $J = 6.8$  Hz, 1H, ArH), 7.34 (t,  $J = 7.6$  Hz, 2H, ArH), 7.39 (d,  $J = 8.0$  Hz, 2H, ArH), 7.48 (d,  $J = 7.6$  Hz, 2H, ArH), 11.02 (s, 1H, CHO).  $^{13}\text{C}$  NMR (100 MHz,  $\text{CDCl}_3$ ):  $\delta$  126.7 (=CH or ArC), 129.1 (ArC), 129.4 (ArC), 132.5 (ArC), 133.5 (ArC), 135.1 (ArC), 135.3 (ArC), 141.7 (ArC), 186.2 (CHO).

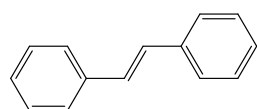

Stilbene (**3n**)<sup>9</sup>

$^1\text{H}$  NMR (400 MHz,  $\text{CDCl}_3$ ):  $\delta$  7.19 (s, 2H, ArH), 7.33 (t,  $J = 7.4$  Hz, 2H, ArH), 7.43

(t,  $J = 7.6$  Hz, 4H, =CH or ArH), 7.58 (d,  $J = 7.6$  Hz, 4H, =CH or ArH).  $^{13}\text{C}$  NMR (100 MHz,  $\text{CDCl}_3$ ):  $\delta$  126.5 (ArC), 127.6 (=CH or ArC), 128.6 (ArC), 137.3 (ArC).

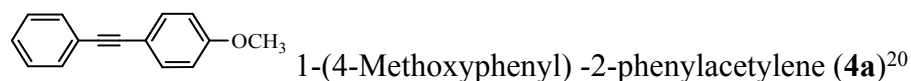

$^1\text{H}$  NMR (400 MHz,  $\text{CDCl}_3$ ):  $\delta$  3.86 (s, 3H,  $\text{CH}_3$ ), 6.93 (d,  $J = 8.8$  Hz, 2H, ArH), 7.39 (m, 3H, ArH), 7.57 (m, 4H, ArH).  $^{13}\text{C}$  NMR (100 MHz,  $\text{CDCl}_3$ ):  $\delta$  55.2 ( $\text{CH}_3$ ), 88.0 ( $\equiv\text{C}$ ), 89.3 ( $\equiv\text{C}$ ), 113.9 (ArC), 115.3 (ArC), 123.5 (ArC), 127.9 (ArC), 128.3 (ArC), 131.4 (ArC), 133.0 (ArC), 159.6 (ArC).

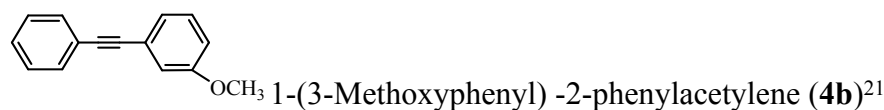

$^1\text{H}$  NMR (400 MHz,  $\text{CDCl}_3$ ):  $\delta$  3.85 (s, 3H), 6.94 (m, 1H, ArH), 7.10 (q,  $J = 1.3$  Hz, 1H, ArH), 7.17 (t,  $J = 3.8$  Hz, 1H, ArH), 7.30 (t,  $J = 8.0$  Hz, 1H, ArH), 7.39 (m, 3H, ArH), 7.57 (m, 2H, ArH).  $^{13}\text{C}$  NMR (100 MHz,  $\text{CDCl}_3$ ):  $\delta$  55.0 ( $\text{CH}_3$ ), 88.4 ( $\equiv\text{C}$ ), 88.9 ( $\equiv\text{C}$ ), 111.4 (ArC), 113.4 (ArC), 119.0 (ArC), 126.4 (ArC), 127.6 (ArC), 128.3 (ArC), 128.8 (ArC), 129.6 (ArC), 136.9 (ArC), 138.4 (ArC), 159.5 (ArC).

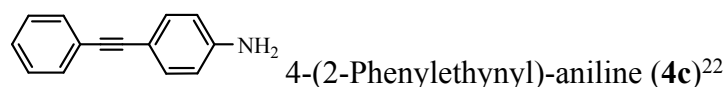

$^1\text{H}$  NMR (400 MHz,  $\text{CDCl}_3$ ):  $\delta$  3.78 (s, 2H,  $\text{NH}_2$ ), 7.37 (m, 5H, ArH), 7.54 (q,  $J = 3.2$  Hz, 4H, ArH).  $^{13}\text{C}$  NMR (100 MHz,  $\text{CDCl}_3$ ):  $\delta$  73.9 ( $\equiv\text{C}$ ), 81.5 ( $\equiv\text{C}$ ), 121.8 (ArC), 128.3 (ArC), 128.4 (ArC), 129.2 (ArC), 132.5 (ArC).

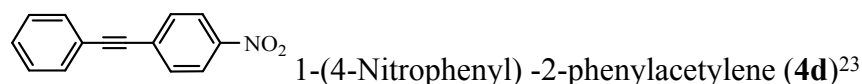

$^1\text{H}$  NMR (400 MHz,  $\text{CDCl}_3$ ):  $\delta$  7.43 (m, 3H, ArH), 7.60 (q,  $J = 3.2$  Hz, 2H, ArH), 7.70 (d,  $J = 8.8$  Hz, 2H, ArH), 8.26 (d,  $J = 8.8$  Hz, 2H, ArH).  $^{13}\text{C}$  NMR (100 MHz,  $\text{CDCl}_3$ ):  $\delta$  87.5 ( $\equiv\text{C}$ ), 94.7 ( $\equiv\text{C}$ ), 122.0 (ArC), 123.6 (ArC), 128.5 (ArC), 129.2 (ArC), 130.2 (ArC), 131.8 (ArC), 132.2 (ArC), 146.9 (ArC).

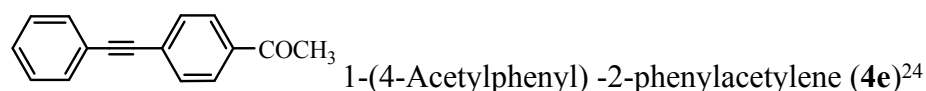

$^1\text{H}$  NMR (400 MHz,  $\text{CDCl}_3$ ):  $\delta$  2.61 (s, 3H,  $\text{CH}_3$ ), 7.37 (t,  $J = 3.2$  Hz, 3H, ArH), 7.56 (m, 2H, ArH), 7.62 (d,  $J = 8.4$  Hz, 2H, ArH), 7.95 (d,  $J = 8.4$  Hz, 2H, ArH).  $^{13}\text{C}$  NMR (100 MHz,  $\text{CDCl}_3$ ):  $\delta$  26.6 ( $\text{CH}_3$ ), 88.6 ( $\equiv\text{C}$ ), 92.7 ( $\equiv\text{C}$ ), 122.7 (ArC), 128.2 (ArC), 128.4 (ArC), 128.8 (ArC), 131.72 (ArC), 131.76 (ArC), 136.2 (ArC), 197.2 (CO).

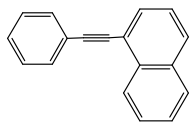

1-(2-Phenylethynyl)naphthalene (**4f**)<sup>23</sup>

<sup>1</sup>H NMR (400 MHz, CDCl<sub>3</sub>):  $\delta$  7.43 (s, 4H, ArH), 7.69 (d,  $J = 5.6$  Hz, 4H, ArH), 7.77 (s, 2H, ArH), 8.51 (t,  $J = 2.6$  Hz, 2H, ArH). <sup>13</sup>C NMR (100 MHz, CDCl<sub>3</sub>):  $\delta$  89.5 ( $\equiv$ C), 96.8 ( $\equiv$ C), 122.1 (ArC), 126.2 (ArC), 127.8 (ArC), 128.5 (ArC), 128.9 (ArC), 131.6 (ArC), 134.5 (ArC), 137.7 (ArC).

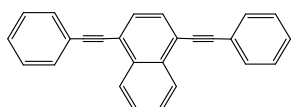

1, 4-Bis(2-phenylethynyl)-naphthalene (**4g**)<sup>25</sup>

<sup>1</sup>H NMR (400 MHz, DMSO-*d*<sub>6</sub>):  $\delta$  7.23 (s, 1H, ArH), 7.44 (m, 2H, ArH), 7.51 (m, 5H, ArH), 7.75 (q,  $J = 3.2$  Hz, 3H, ArH), 7.81 (d,  $J = 3.3$  Hz, 2H, ArH), 7.88 (d,  $J = 10.8$  Hz, 2H, ArH), 8.48 (q,  $J = 3.2$  Hz, 1H, ArH). <sup>13</sup>C NMR (100 MHz, DMSO-*d*<sub>6</sub>):  $\delta$  87.0 ( $\equiv$ C), 96.2 ( $\equiv$ C), 120.6 (ArC), 122.0 (ArC), 124.3 (ArC), 126.2 (ArC), 127.1 (ArC), 128.1 (ArC), 128.8 (ArC), 128.9 (ArC), 129.2 (ArC), 129.9 (ArC), 131.5 (ArC), 132.2 (ArC).

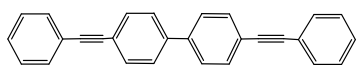

4, 4'-Bis(2-phenylethynyl)-1,1'-biphenyl (**4h**)<sup>26</sup>

<sup>1</sup>H NMR (400 MHz, CDCl<sub>3</sub>):  $\delta$  7.35 (d,  $J = 2.0$  Hz, 2H, ArH), 7.37 (q,  $J = 2.1$  Hz, 2H, ArH), 7.45 (s, 1H, ArH), 7.47 (d,  $J = 8.4$  Hz, 2H, ArH), 7.54 (t,  $J = 1.8$  Hz, 2H, ArH), 7.56 (d,  $J = 3.2$  Hz, 5H, ArH), 7.58 (d,  $J = 2.0$  Hz, 3H, ArH), 7.61 (s, 1H, ArH). <sup>13</sup>C NMR (100 MHz, CDCl<sub>3</sub>):  $\delta$  89.1 ( $\equiv$ C), 90.3 ( $\equiv$ C), 93.5 ( $\equiv$ C), 103.6 ( $\equiv$ C), 121.9 (ArC), 123.2 (ArC), 126.8 (ArC), 128.3 (ArC), 128.5 (ArC), 131.6 (ArC), 131.9 (ArC), 132.1 (ArC).

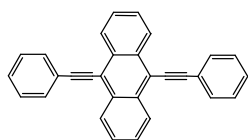

9, 10-Bis(2-phenylethynyl)-anthracene (**4i**)<sup>25</sup>

<sup>1</sup>H NMR (400 MHz, DMSO-*d*<sub>6</sub>):  $\delta$  7.60 (m, 7H, ArH), 7.64 (m, 2H, ArH), 7.84 (q,  $J = 3.3$  Hz, 3H, ArH), 7.93 (q,  $J = 3.0$  Hz, 3H, ArH), 7.84 (q,  $J = 3.2$  Hz, 3H, ArH). <sup>13</sup>C NMR (100 MHz, DMSO-*d*<sub>6</sub>):  $\delta$  85.7 ( $\equiv$ C), 87.1 ( $\equiv$ C), 117.5 (ArC), 122.1 (ArC), 126.8 (ArC), 127.8 (ArC), 128.6 (ArC), 128.8 (ArC), 128.9 (ArC), 129.4 (ArC), 131.2 (ArC), 131.4 (ArC), 131.5 (ArC), 131.6 (ArC).

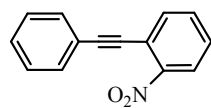

(2-Nitrophenyl)phenylacetylene (**4j**)<sup>27</sup>

<sup>1</sup>H NMR (400 MHz, CDCl<sub>3</sub>):  $\delta$  7.40 (m, ArH), 7.57 (q,  $J = 3.0$  Hz, 4H, ArH). <sup>13</sup>C NMR (100 MHz, CDCl<sub>3</sub>):  $\delta$  73.9 ( $\equiv$ C), 81.5 ( $\equiv$ C), 121.8 (ArC), 128.4 (ArC), 129.2 (ArC), 132.5 (ArC).

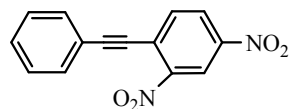

2,4-Dinitro-1-(2-phenylethynyl)-acetylene (**4k**)<sup>28</sup>

<sup>1</sup>H NMR (400 MHz, CDCl<sub>3</sub>):  $\delta$  7.39 (d,  $J = 7.2$  Hz, 5H, ArH), 7.57 (d,  $J = 6.8$  Hz, 3H, ArH). <sup>13</sup>C NMR (100 MHz, CDCl<sub>3</sub>):  $\delta$  73.9 ( $\equiv$ C), 81.5 ( $\equiv$ C), 121.8 (ArC), 128.4 (ArC), 129.2 (ArC), 132.5 (ArC).

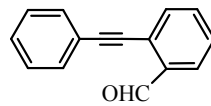

2-(Phenylethynyl) benzaldehyde (**4l**)<sup>29</sup>

<sup>1</sup>H NMR (400 MHz, CDCl<sub>3</sub>):  $\delta$  7.36 (m, 3H, ArH), 7.51 (q,  $J = 6.8$  Hz, 5H, ArH), 8.04 (d,  $J = 7.6$  Hz, 1H, ArH), 11.08 (s, 1H, CHO). <sup>13</sup>C NMR (100 MHz, CDCl<sub>3</sub>):  $\delta$  89.8 ( $\equiv$ C), 92.2 ( $\equiv$ C), 126.7 (ArC), 128.4 (ArC), 131.5 (ArC), 132.4 (ArC), 132.5 (ArC), 133.5 (ArC), 134.7 (ArC), 136.7 (ArC), 157.0 (ArC), 193.3 (CHO).

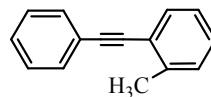

2-Methylphenylacetylene (**4m**)<sup>30</sup>

<sup>1</sup>H NMR (400 MHz, CDCl<sub>3</sub>):  $\delta$  1.56 (s, 3H, ArH), 7.39 (m, 6H, ArH), 7.56 (t,  $J = 4.0$  Hz, 3H, ArH). <sup>13</sup>C NMR (100 MHz, CDCl<sub>3</sub>):  $\delta$  26.6 (CH<sub>3</sub>), 88.6 ( $\equiv$ C), 92.7 ( $\equiv$ C), 122.7 (ArC), 128.2 (ArC), 128.4 (ArC), 128.8 (ArC), 131.72 (ArC), 131.76 (ArC), 136.2 (ArC).

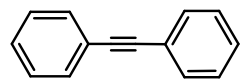

Diphenylacetylene (**4n**)<sup>30</sup>

<sup>1</sup>H NMR (400 MHz, CDCl<sub>3</sub>):  $\delta$  7.27 (d,  $J = 3.6$  Hz, 2H, ArH), 7.37 (d,  $J = 8.0$  Hz, 4H, ArH), 7.54 (d,  $J = 7.8$  Hz, 4H, ArH). <sup>13</sup>C NMR (100 MHz, CDCl<sub>3</sub>):  $\delta$  83.8 ( $\equiv$ C), 125.6

(ArC), 127.2 (ArC), 128.1 (ArC), 128.3 (ArC), 128.9 (ArC), 131.9 (ArC), 137.7 (ArC).

**5. The figures of  $^1\text{H}$  NMR and  $^{13}\text{C}$  NMR spectra for all intermediates, precursor [(S)-LH<sub>2</sub>] $\cdot$ (PF<sub>6</sub>)<sub>2</sub>, complex 1, and all coupling products in Suzuki-Miyaura, Heck-Mizoroki and Sonogashira reactions**

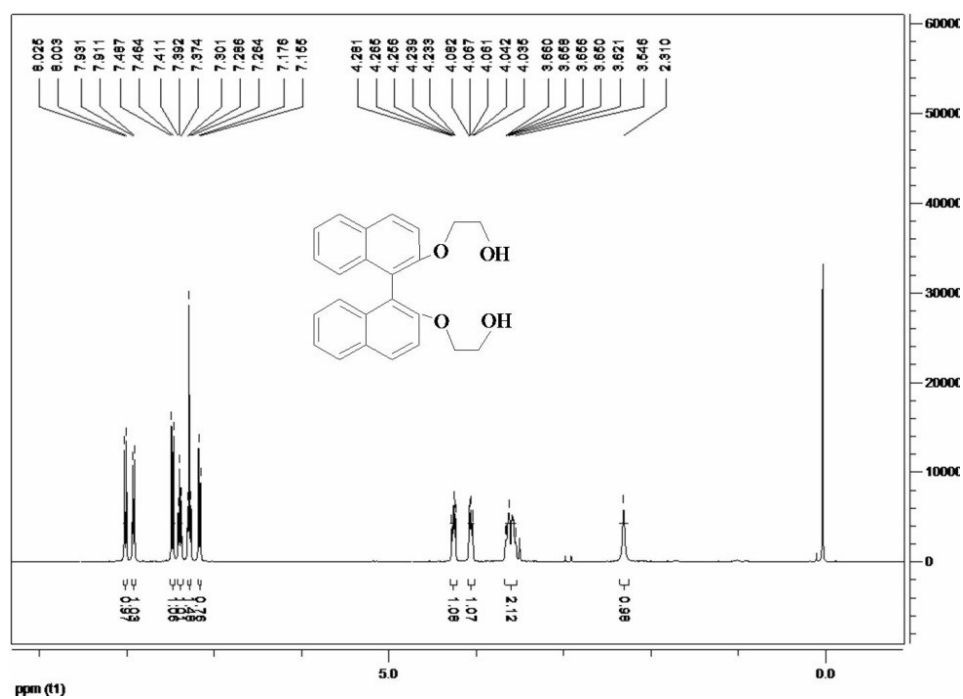

**Fig. S2** The  $^1\text{H}$  NMR (400 MHz,  $\text{CDCl}_3$ ) spectrum of (S)-2,2'-di(2'-hydroxyethoxy)-1,1'-binaphthyl.



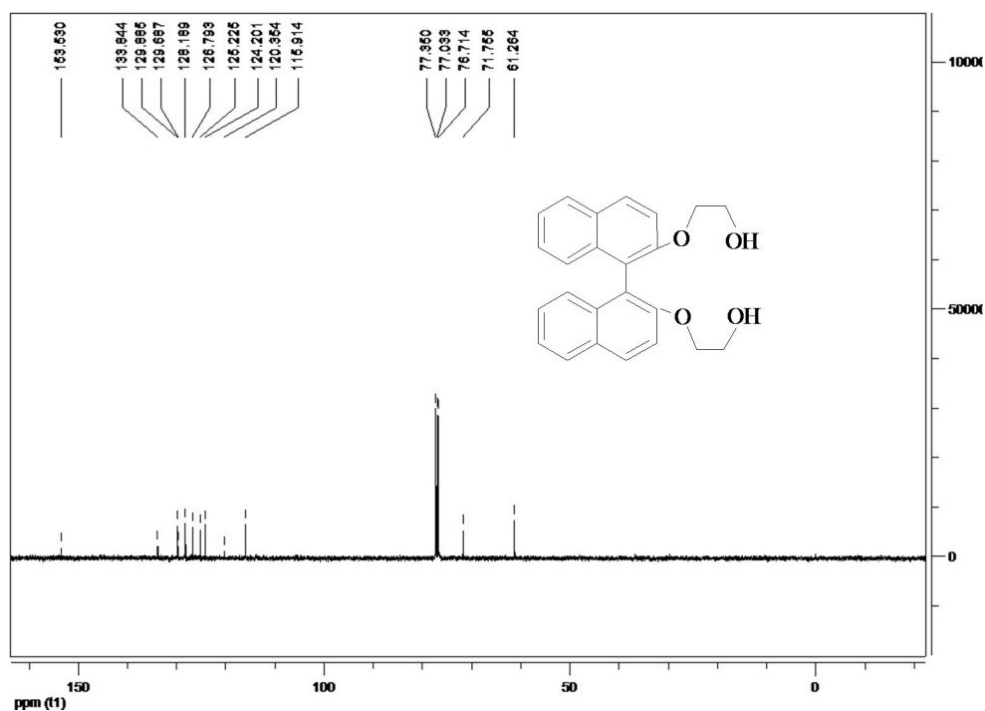

**Fig. S3** The  $^{13}\text{C}$  NMR (100 MHz,  $\text{CDCl}_3$ ) spectrum of (S)-2,2'-di(2'-hydroxyethoxy)-1,1'-binaphthyl.

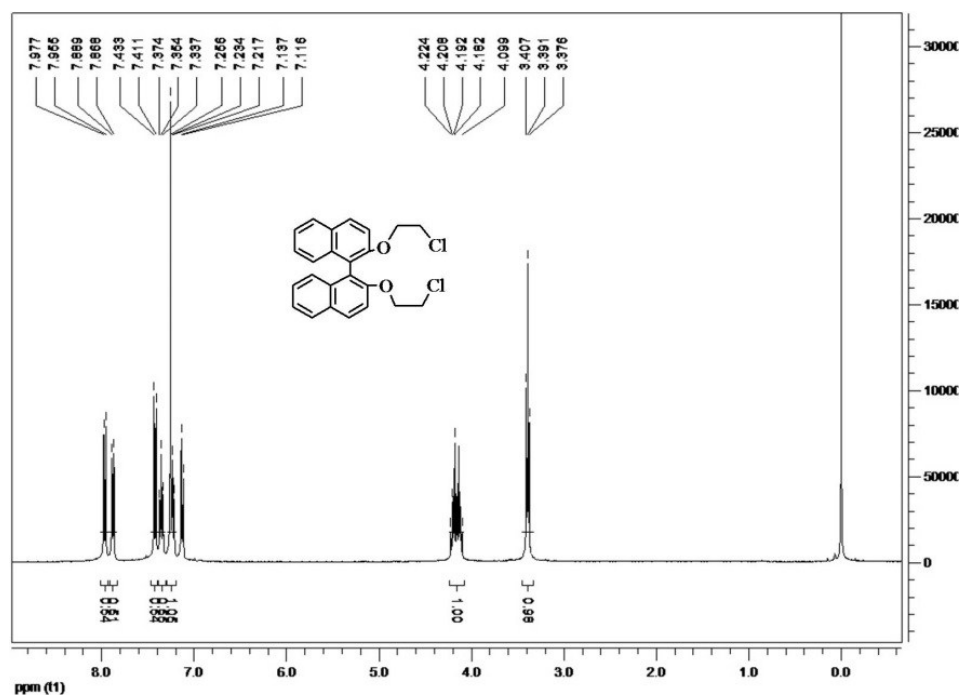

**Fig. S4** The  $^1\text{H}$  NMR (400 MHz,  $\text{CDCl}_3$ ) spectrum of (S)-2,2'-di(2'-chloroethoxy)-1,1'-binaphthyl

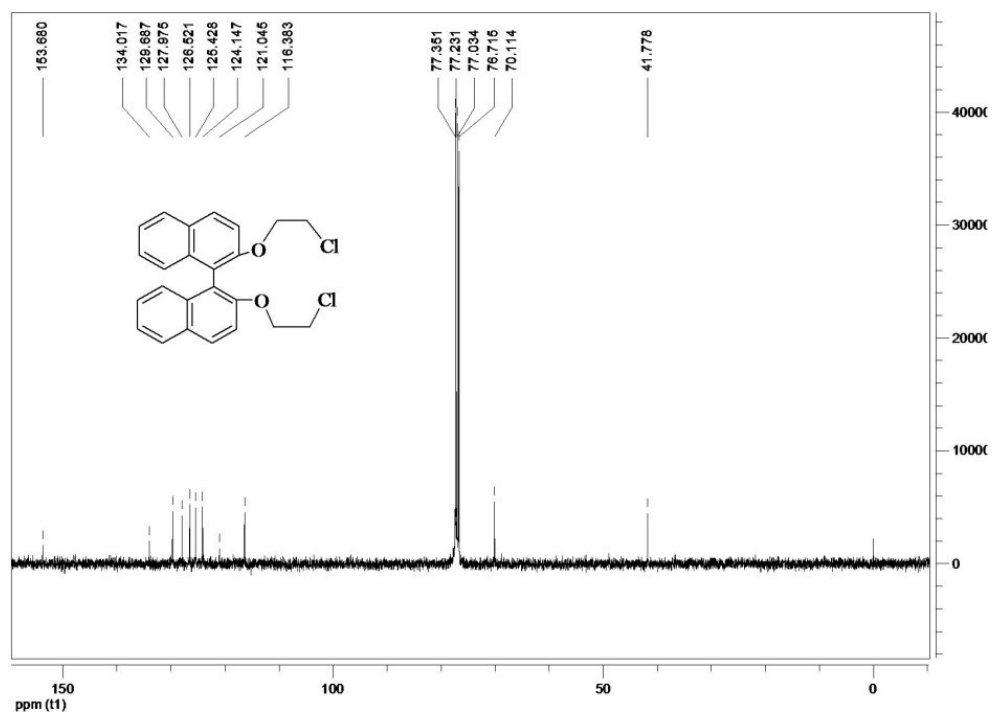

**Fig. S5** The  $^{13}\text{C}$  NMR (100 MHz,  $\text{CDCl}_3$ ) spectrum of (S)-2,2'-di(2'-chloroethoxy)-1,1'-binaphthyl.

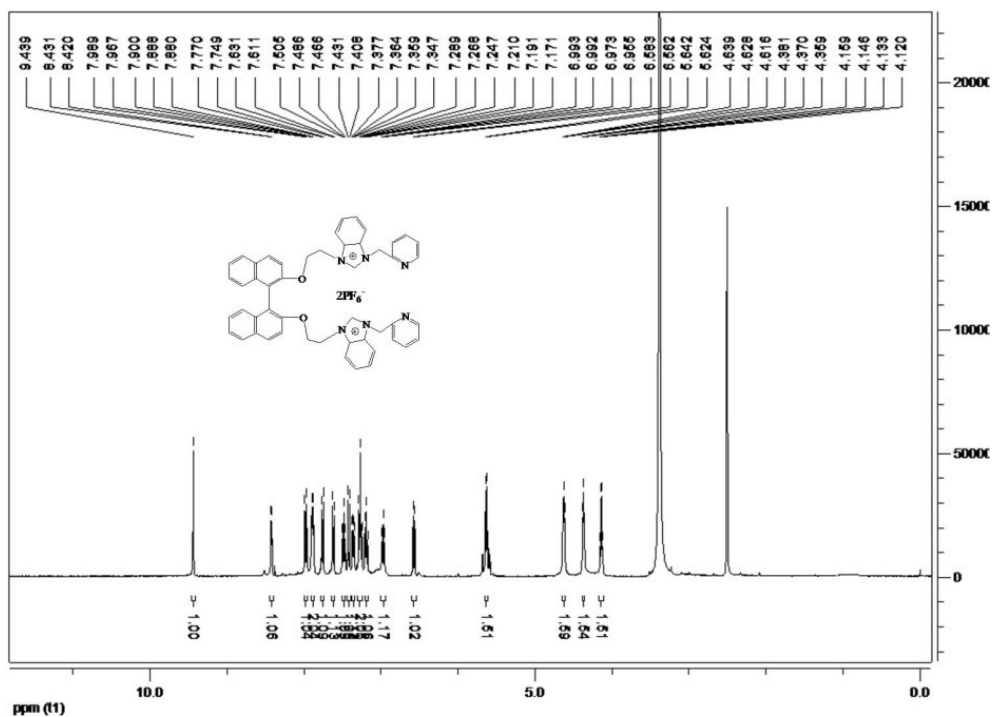

**Fig. S6** The  $^1\text{H}$  NMR (400 MHz,  $\text{DMSO-d}_6$ ) spectrum of [(S)-LH<sub>2</sub>] $\cdot$ (PF<sub>6</sub>)<sub>2</sub>.

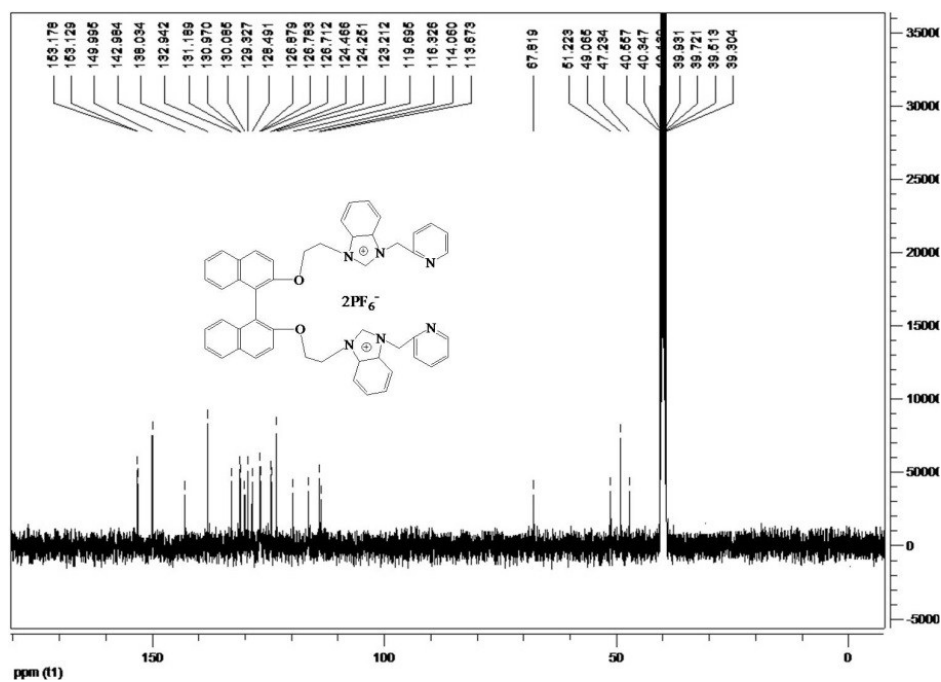

Fig. S7 The  $^{13}\text{C}$  NMR (100 MHz,  $\text{DMSO-d}_6$ ) spectrum of  $[(S)\text{-LH}_2] \cdot (\text{PF}_6)_2$ .

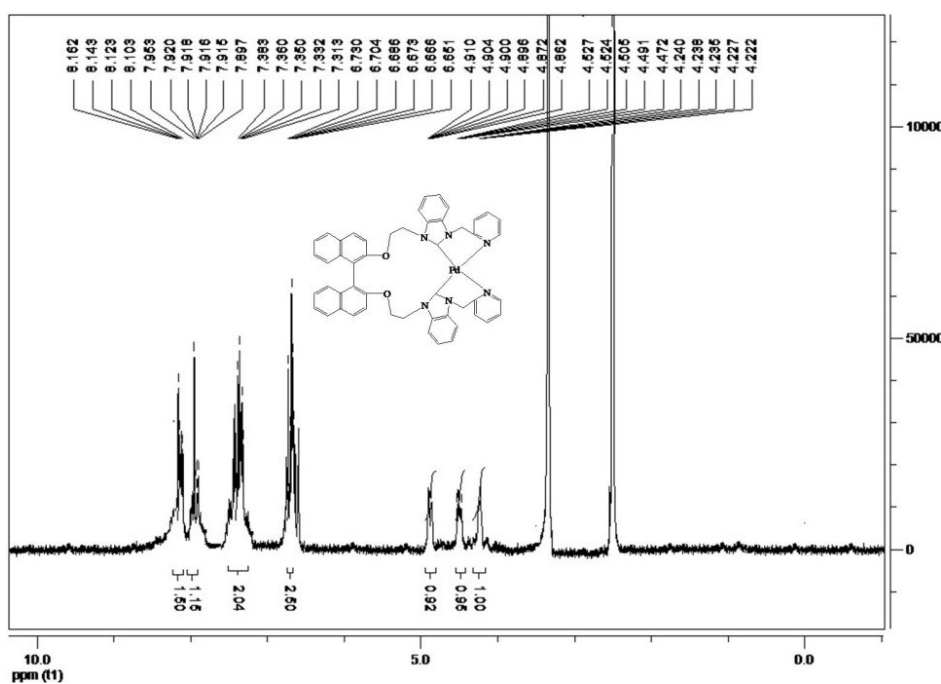

Fig. S8 The  $^1\text{H}$  NMR (400 MHz,  $\text{DMSO-d}_6$ ) spectrum of **1**.

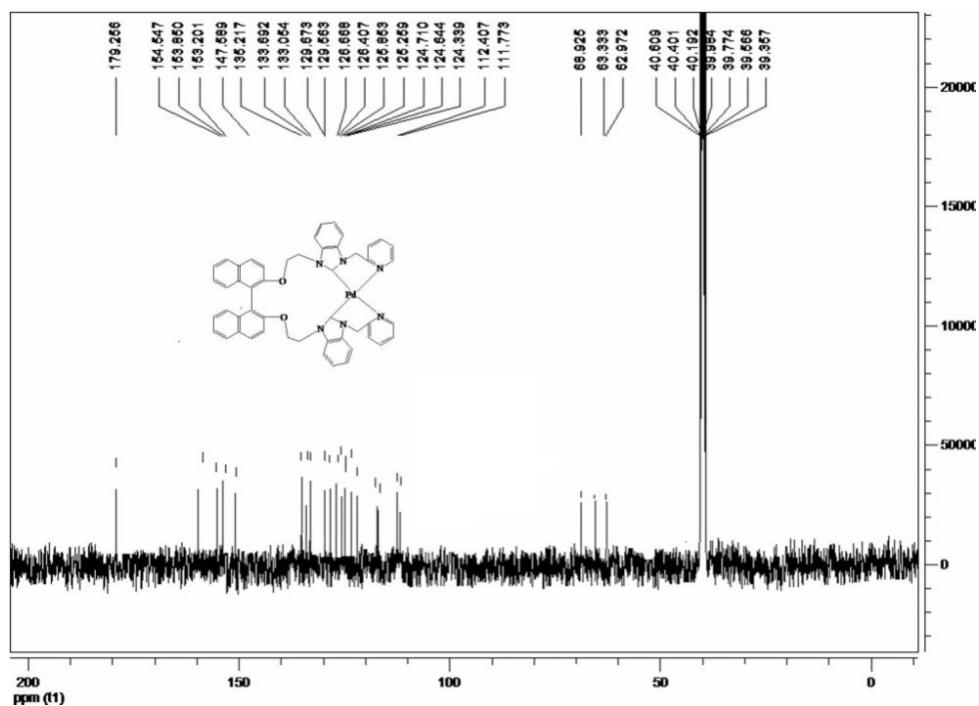

**Fig. S9** The <sup>13</sup>C NMR (100 MHz, DMSO-d<sub>6</sub>) spectrum of 1.

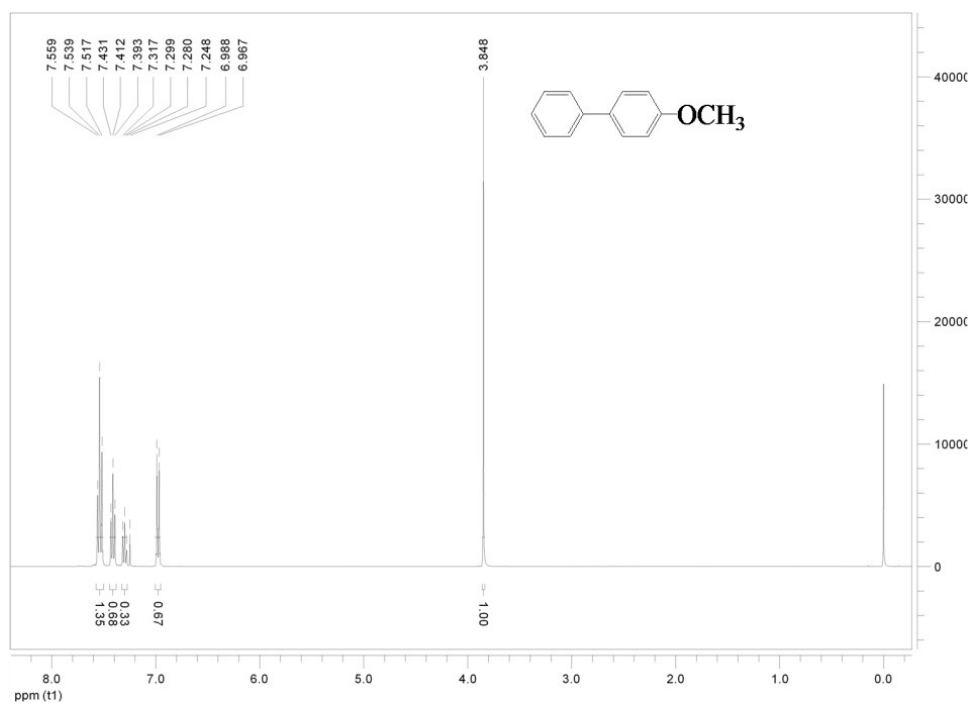

**Fig. S10** The <sup>1</sup>H NMR (400 MHz, CDCl<sub>3</sub>) spectrum of 4-methoxybiphenyl (2a).

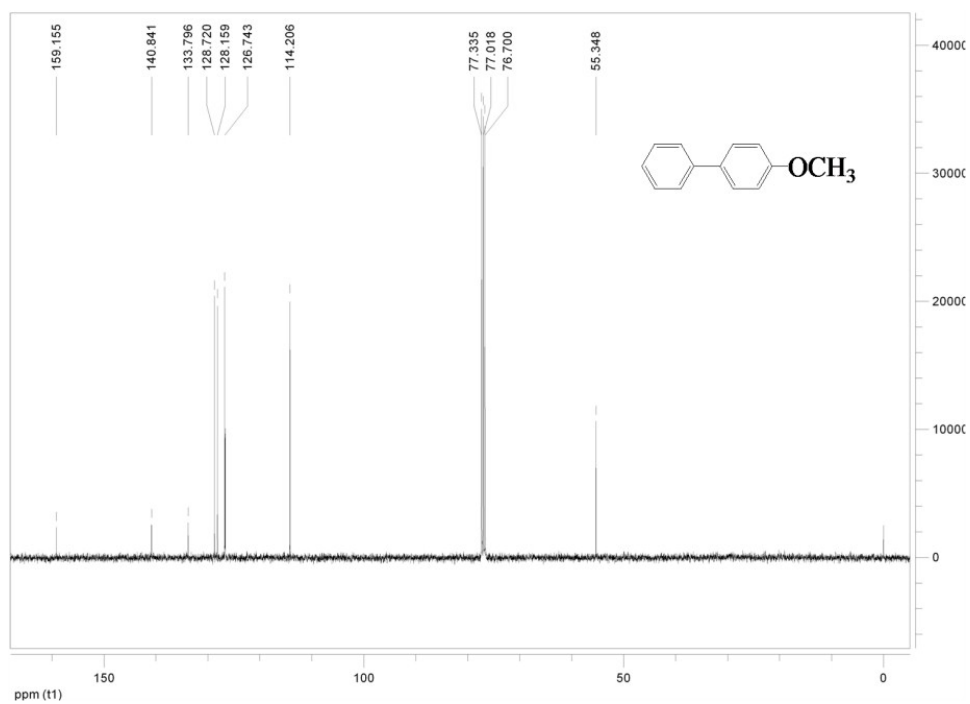

**Fig. S11** The  $^{13}\text{C}$  NMR (100 MHz,  $\text{CDCl}_3$ ) spectrum of 4-methoxybiphenyl (**2a**).

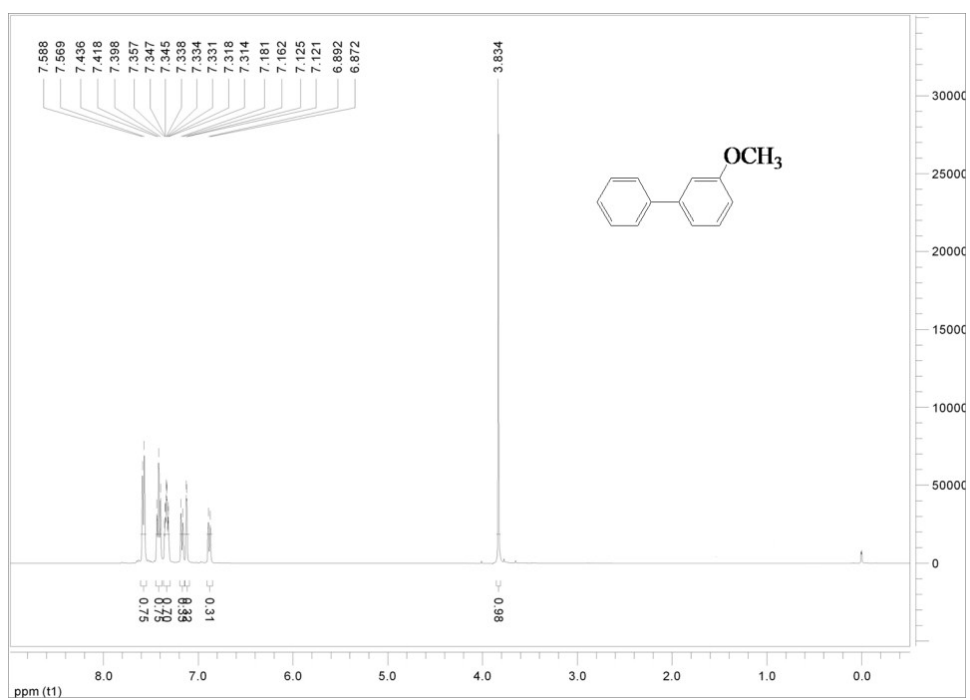

**Fig. S12** The  $^1\text{H}$  NMR (400 MHz,  $\text{CDCl}_3$ ) spectrum of 3-methoxybiphenyl (**2b**).

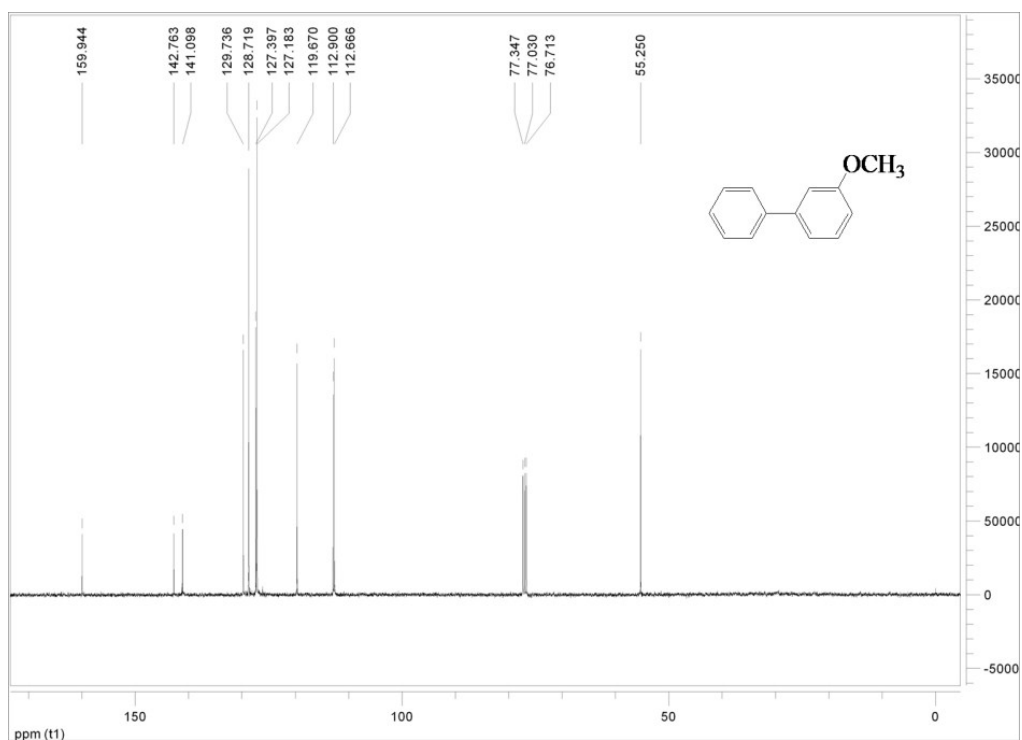

**Fig. S13** The  $^{13}\text{C}$  NMR (100 MHz,  $\text{CDCl}_3$ ) spectrum of 3-methoxybiphenyl (**2b**).

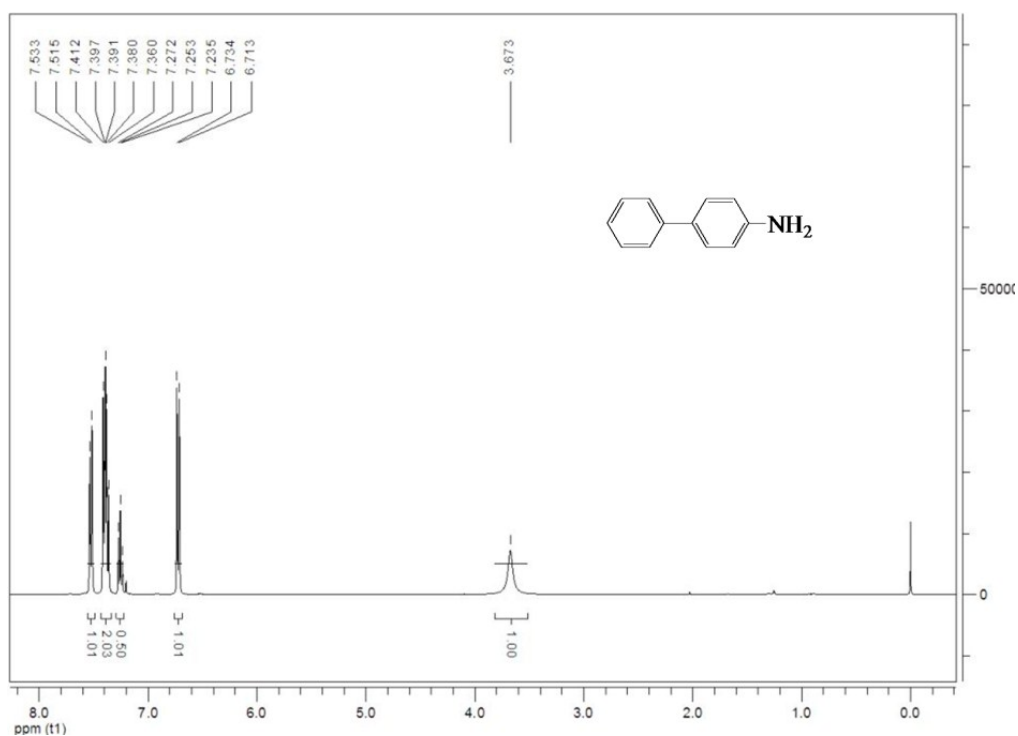

**Fig. S14** The  $^1\text{H}$  NMR (400 MHz,  $\text{CDCl}_3$ ) spectrum of 4-phenylaniline (**2c**).

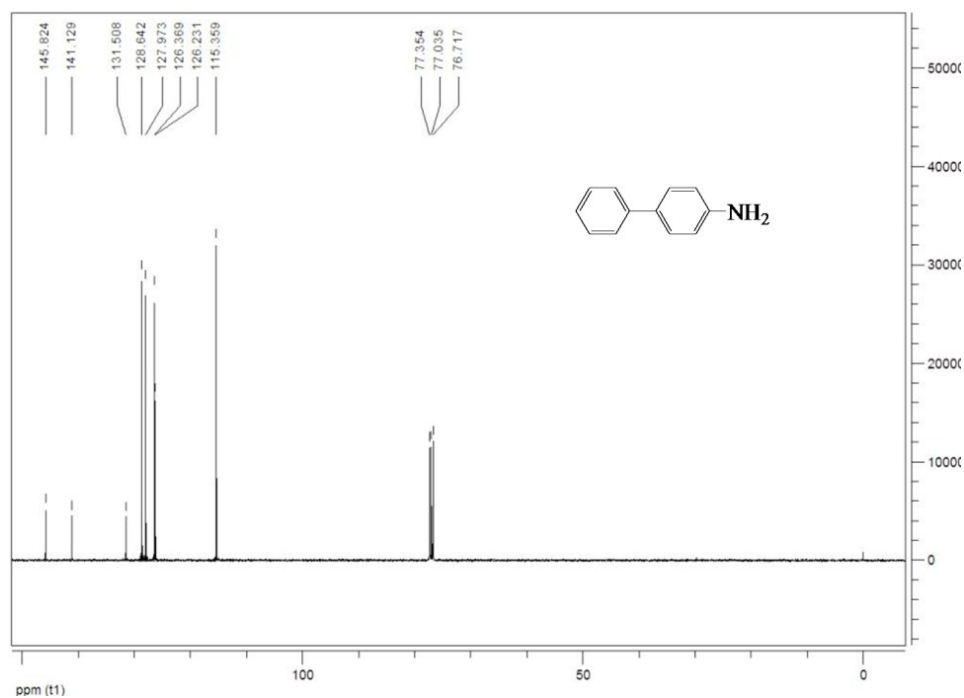

**Fig. S15** The  $^{13}\text{C}$  NMR (100 MHz,  $\text{CDCl}_3$ ) spectrum of 4-phenylaniline (**2c**).

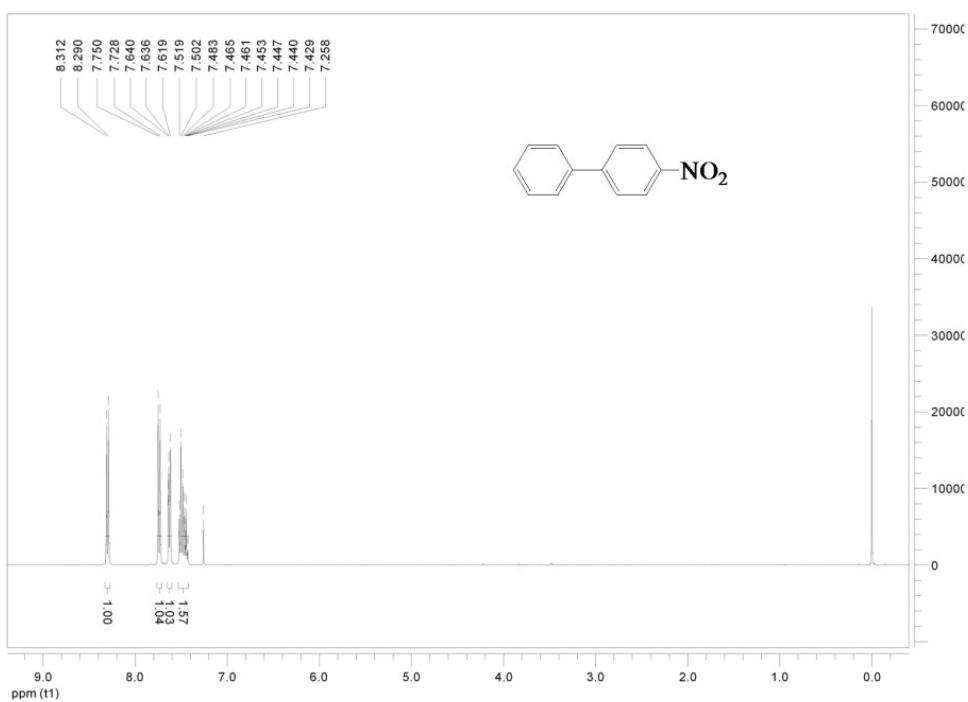

**Fig. S16** The  $^1\text{H}$  NMR (400 MHz,  $\text{CDCl}_3$ ) spectrum of 4-nitrobiphenyl (**2d**).

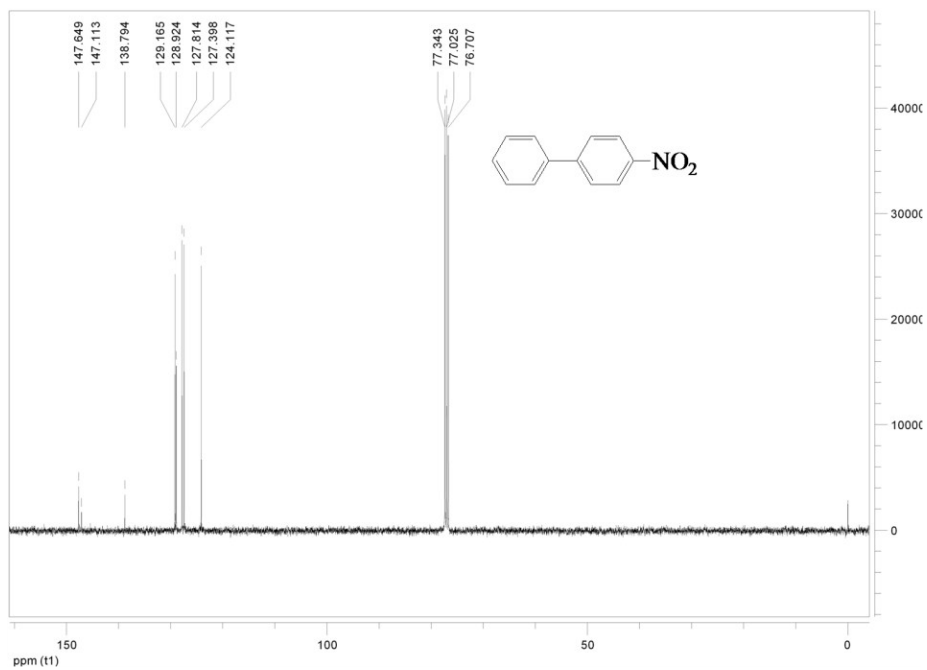

**Fig. S17** The  $^{13}\text{C}$  NMR (100 MHz,  $\text{CDCl}_3$ ) spectrum of 4-nitrobiphenyl (**2d**).

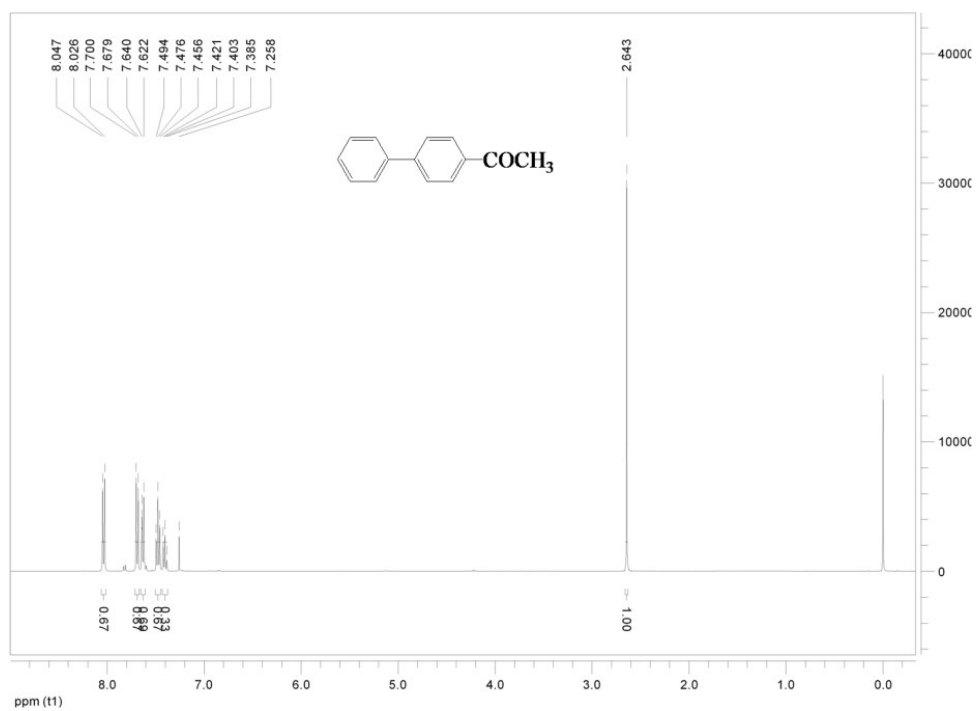

**Fig. S18** The  $^1\text{H}$  NMR (400 MHz,  $\text{CDCl}_3$ ) spectrum of 4-acetylbiphenyl (**2e**).



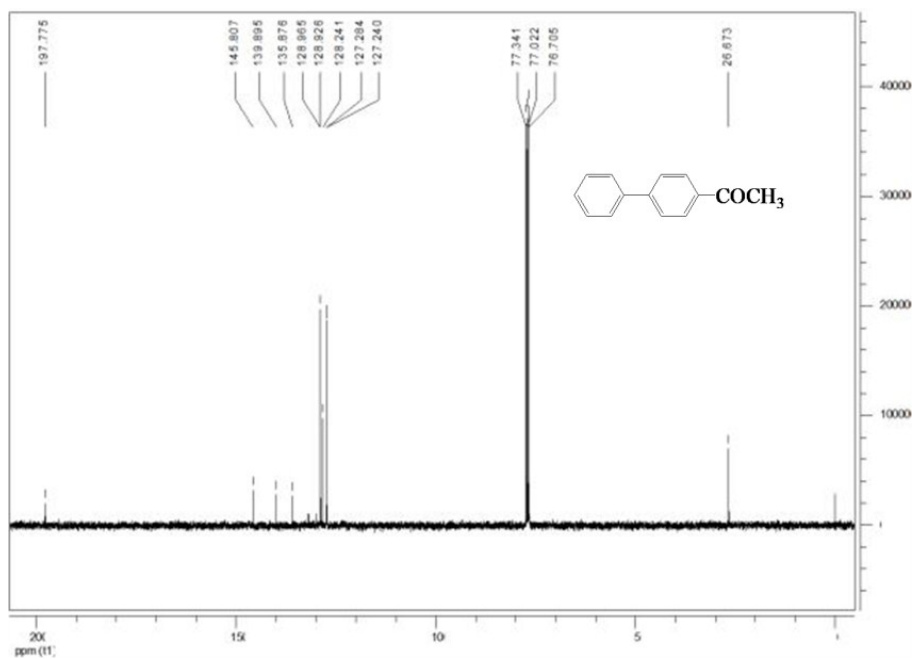

**Fig. S19** The  $^{13}\text{C}$  NMR (100 MHz,  $\text{CDCl}_3$ ) spectrum of 4-acetylbiphenyl (**2e**).

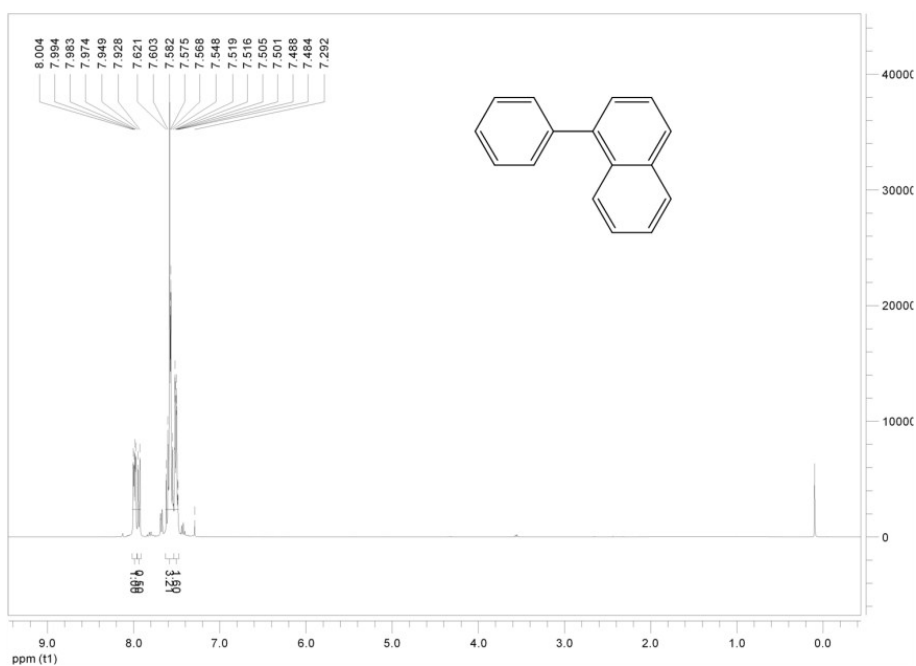

**Fig. S20** The  $^1\text{H}$  NMR (400 MHz,  $\text{CDCl}_3$ ) spectrum of 1-phenylnaphthalene (**2f**).

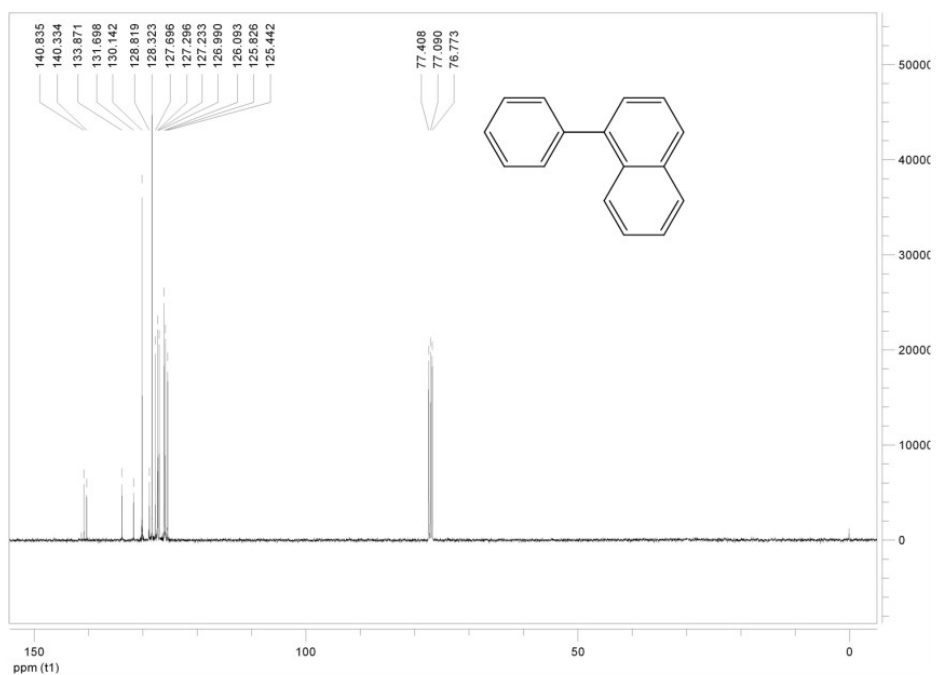

**Fig. S21** The  $^{13}\text{C}$  NMR (100 MHz,  $\text{CDCl}_3$ ) spectrum of 1-phenylnaphthalene (**2f**).

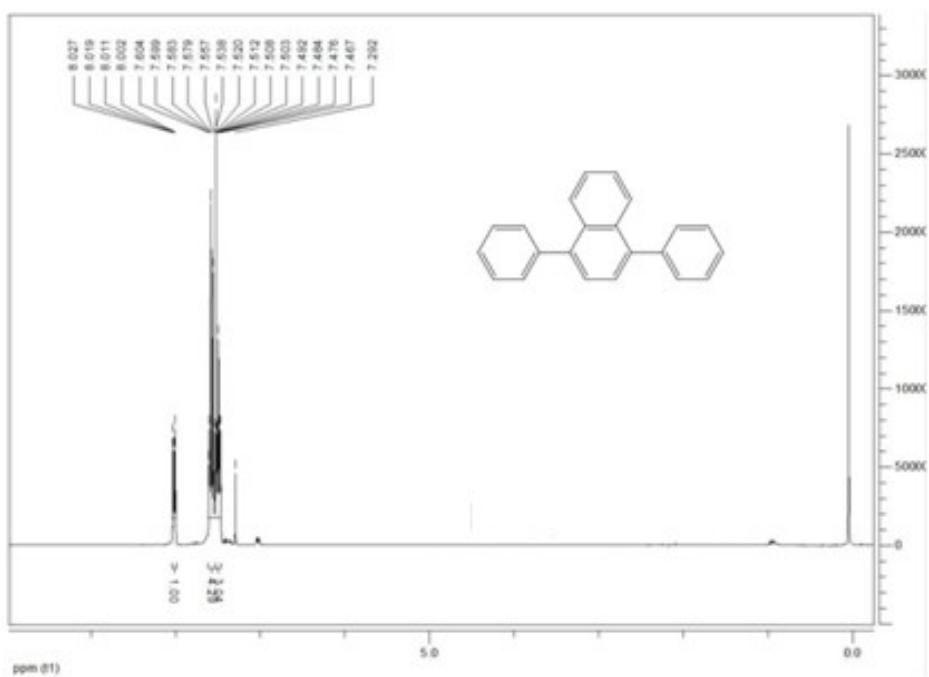

**Fig. S22** The  $^1\text{H}$  NMR (400 MHz,  $\text{CDCl}_3$ ) spectrum of 1,4-diphenylnaphthalene (**2g**).

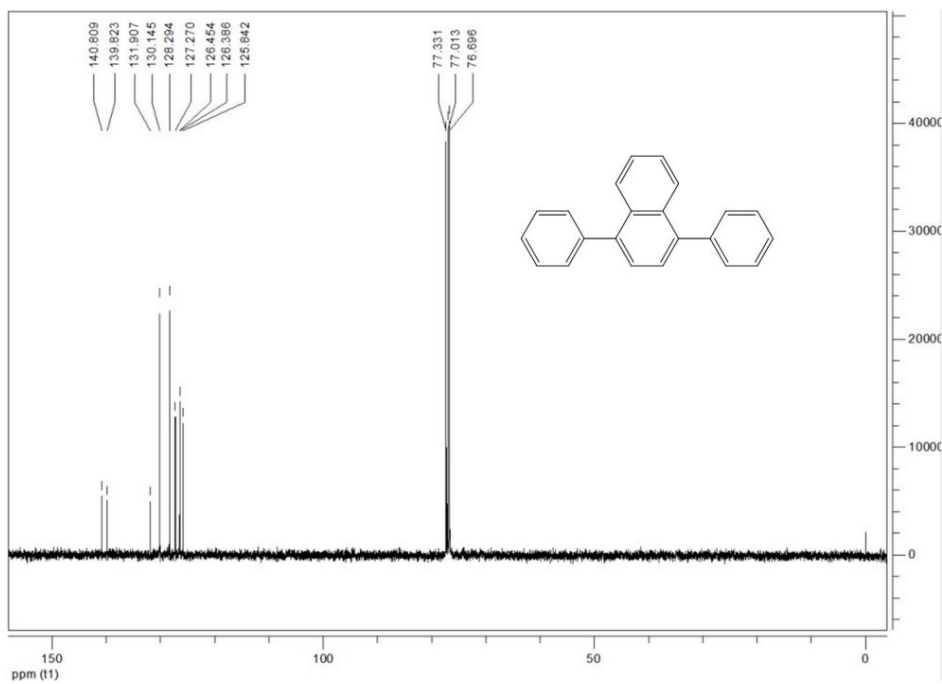

**Fig. S23** The  $^{13}\text{C}$  NMR (100 MHz,  $\text{CDCl}_3$ ) spectrum of 1,4-diphenylnaphthalene (**2g**).

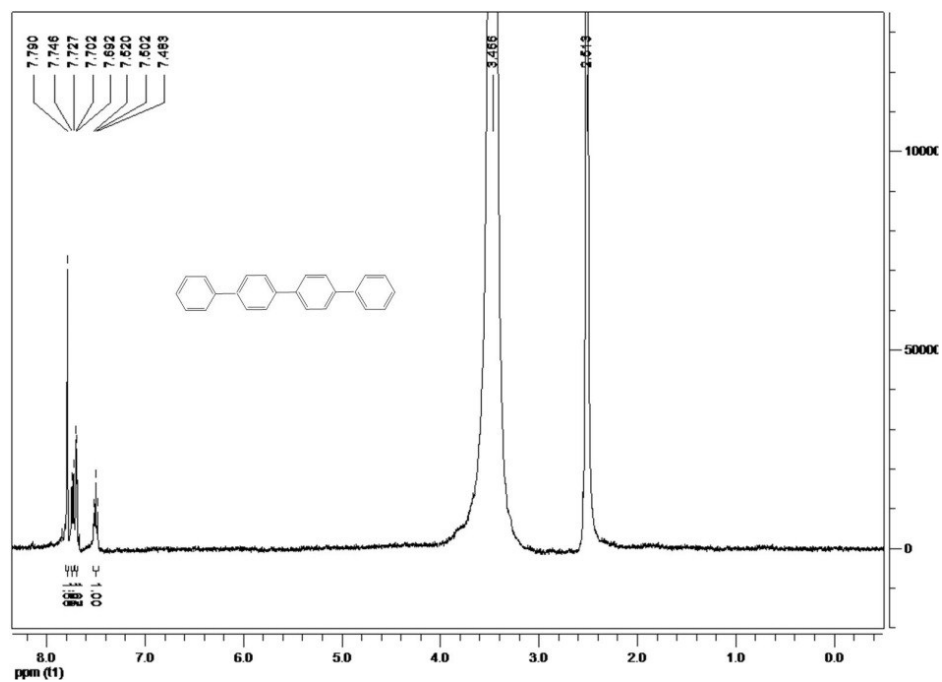

**Fig. S24** The  $^1\text{H}$  NMR (400 MHz,  $\text{DMSO}-d_6$ ) of 4, 4'-diphenylbiphenyl (**2h**).

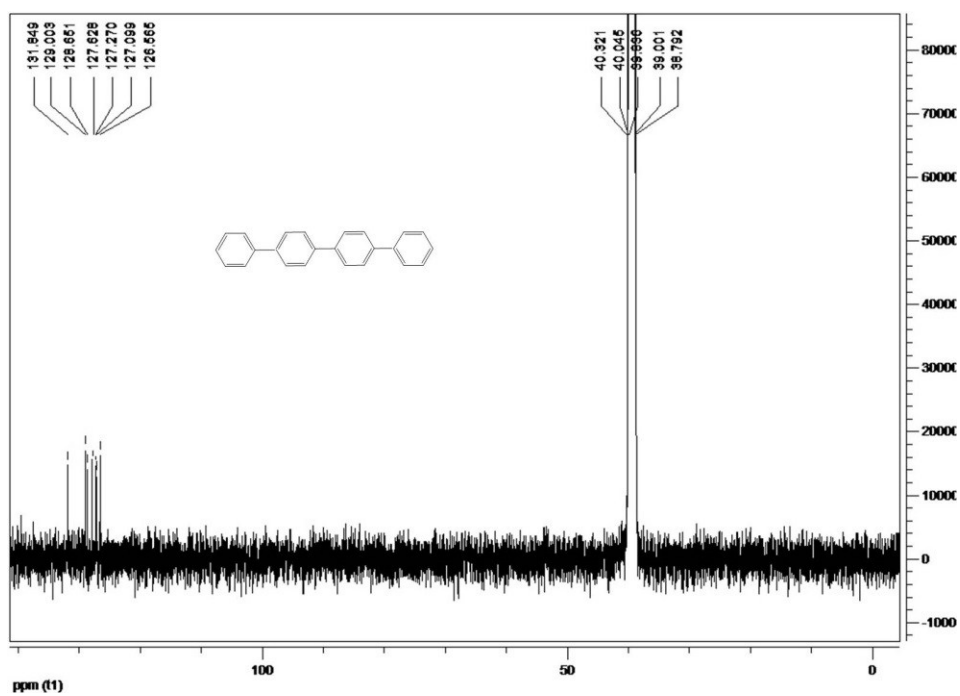

**Fig. S25** The  $^{13}\text{C}$  NMR (100 MHz,  $\text{DMSO-}d_6$ ) spectrum of 4, 4'-diphenylbiphenyl (2h).

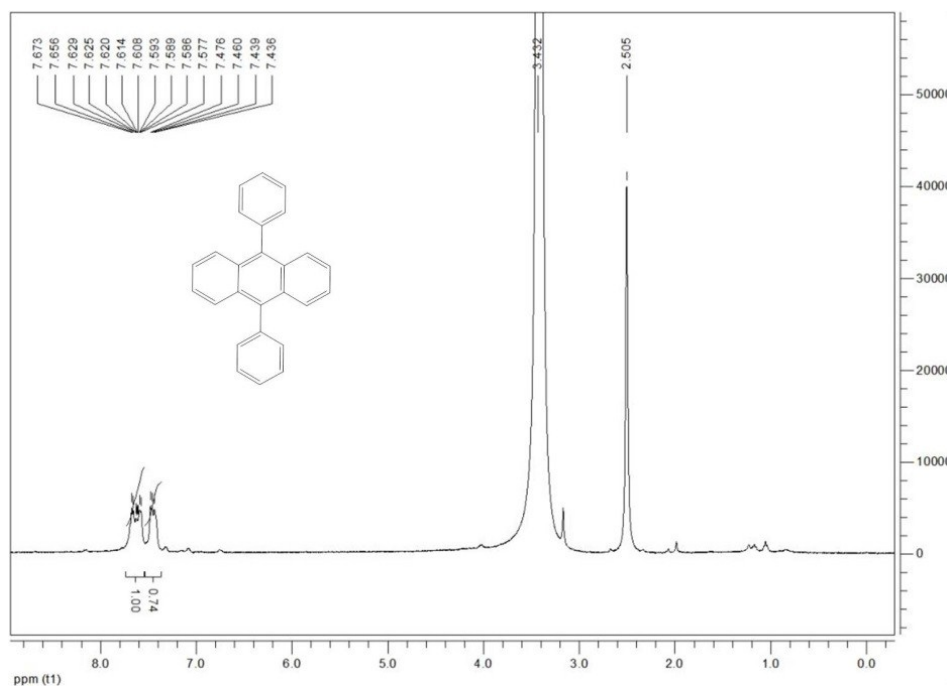

**Fig. S26** The  $^1\text{H}$  NMR (400 MHz,  $\text{DMSO-}d_6$ ) spectrum of 9,10-diphenylanthracene (2i).

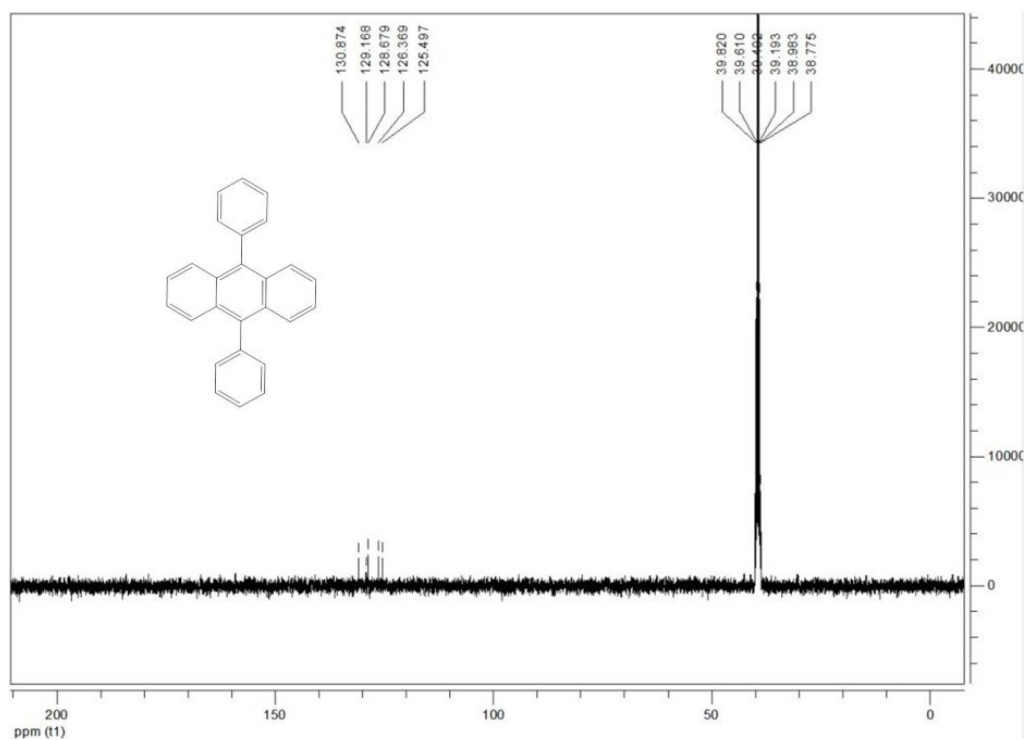

**Fig. S27** The  $^{13}\text{C}$  NMR (100 MHz,  $\text{DMSO-}d_6$ ) spectrum of 9,10-diphenylanthracene (**2i**).

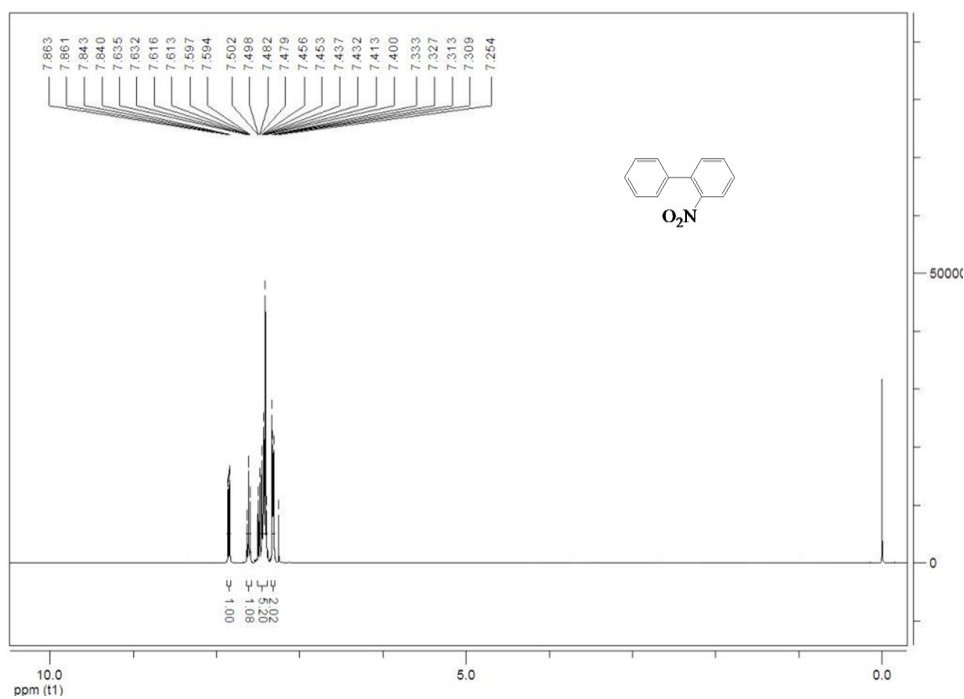

**Fig. S28** The  $^1\text{H}$  NMR (400 MHz,  $\text{CDCl}_3$ ) spectrum of 2-nitrophenyl (**2j**).

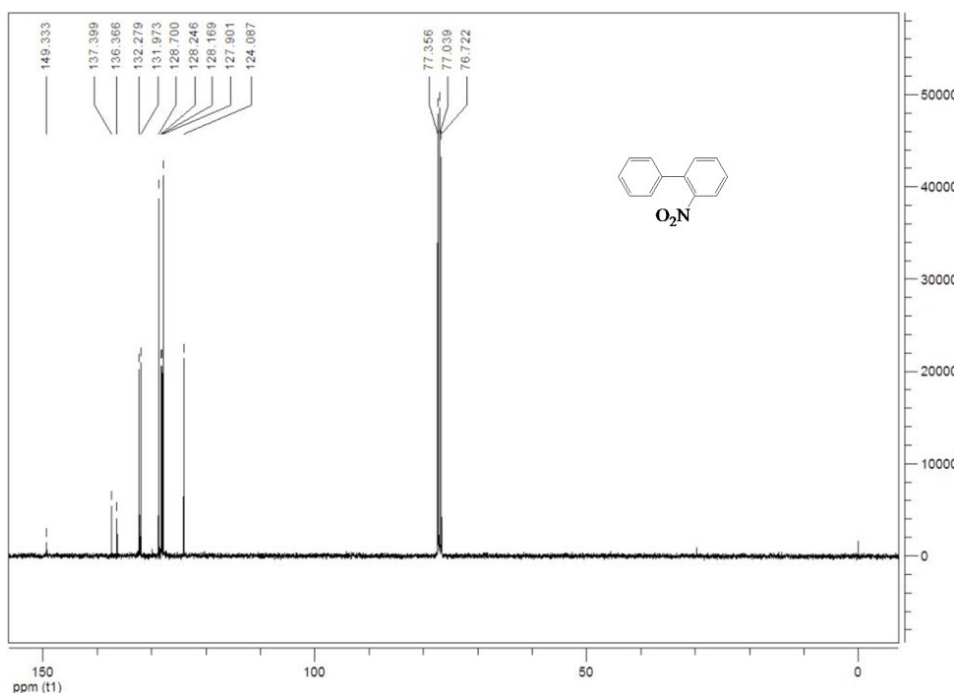

**Fig. S29** The  $^{13}\text{C}$  NMR (100 MHz,  $\text{CDCl}_3$ ) spectrum of 2-nitrophenyl (**2j**).

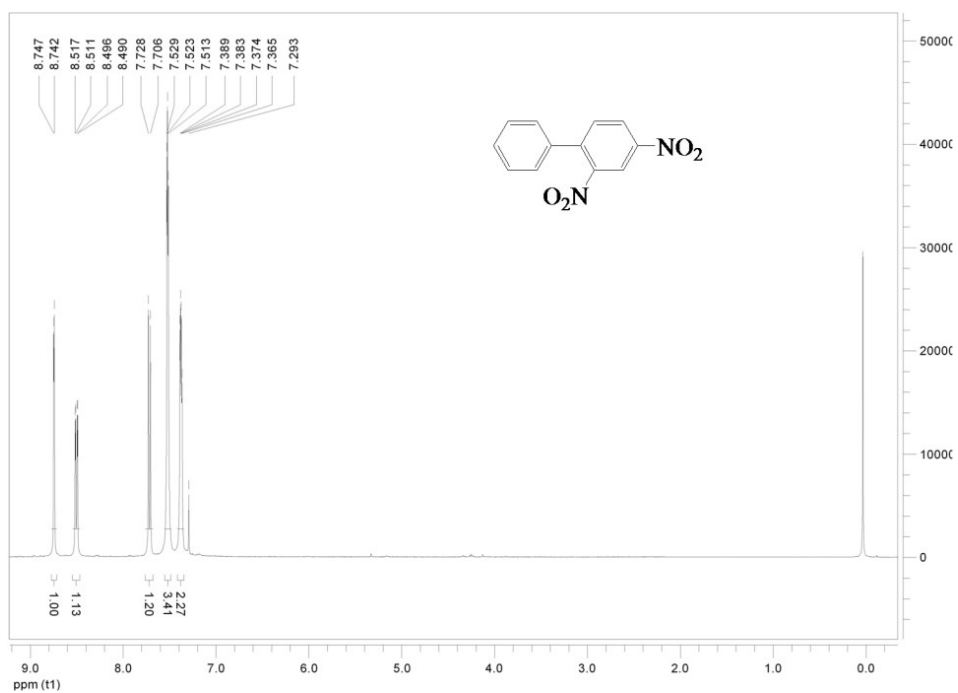

**Fig. S30** The  $^1\text{H}$  NMR (400 MHz,  $\text{CDCl}_3$ ) spectrum of 2,4-dinitrophenyl (**2k**).

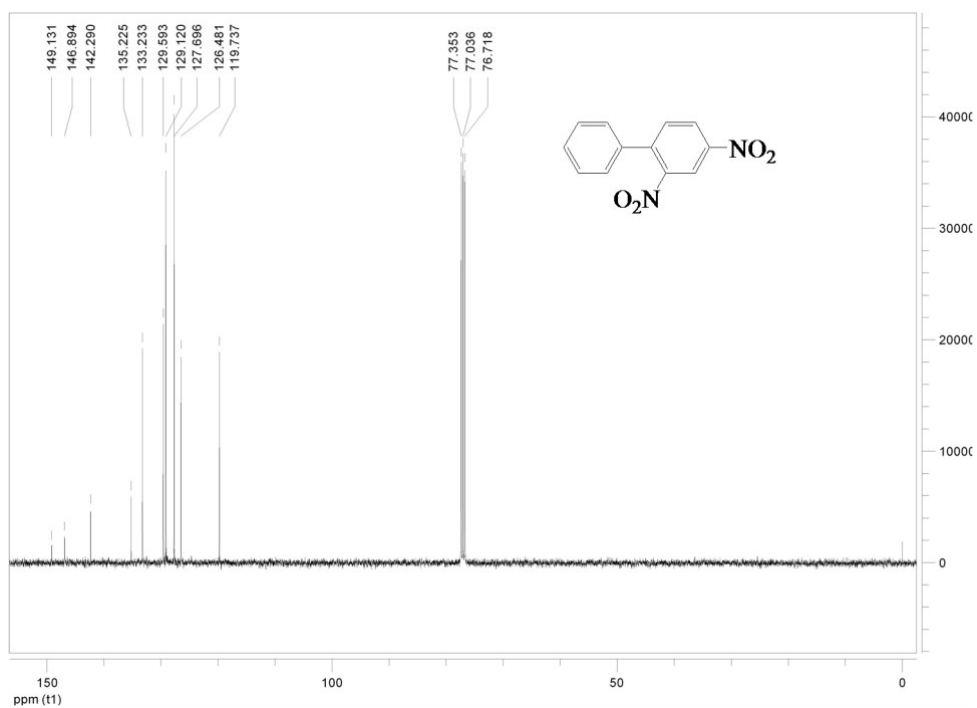

**Fig. S31** The  $^{13}\text{C}$  NMR (100 MHz,  $\text{CDCl}_3$ ) spectrum of 2,4-dinitrobiphenyl (**2k**).

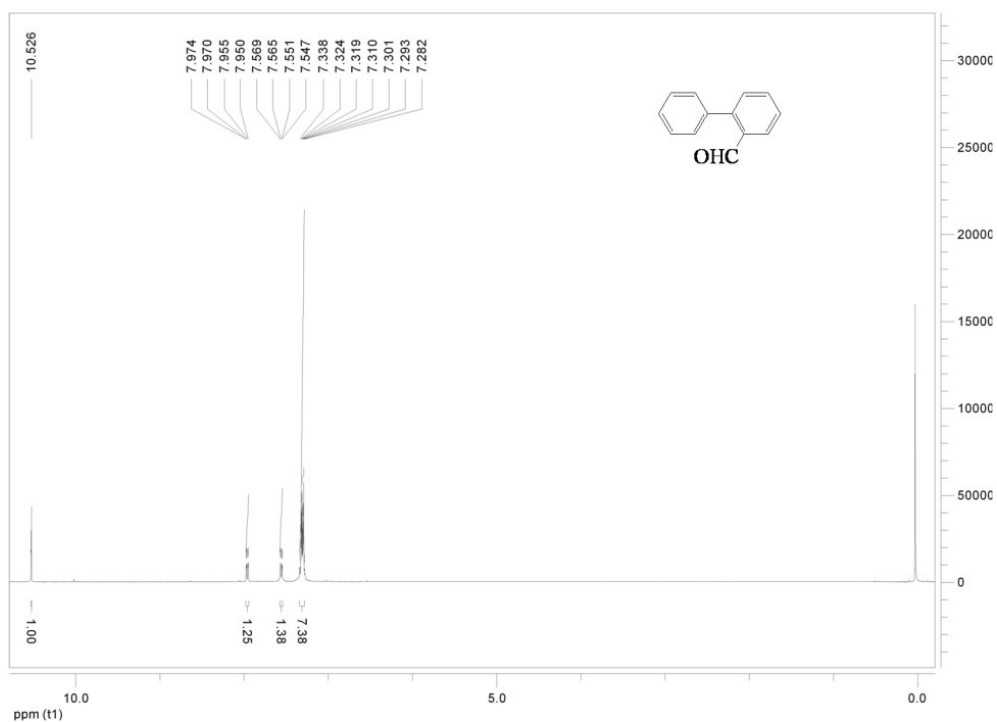

**Fig. S32** The  $^1\text{H}$  NMR (400 MHz,  $\text{CDCl}_3$ ) spectrum of biphenyl-2-carbaldehyde (**2l**).

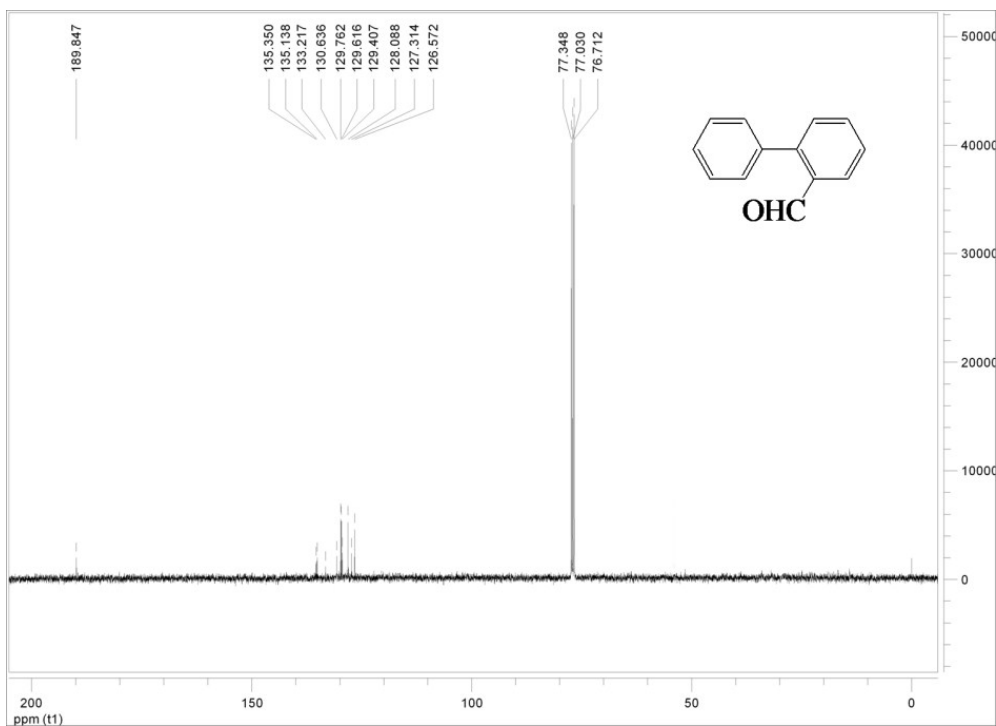

**Fig. S33** The  $^{13}\text{C}$  NMR (100 MHz,  $\text{CDCl}_3$ ) spectrum of biphenyl-2-carbaldehyde (**21**).

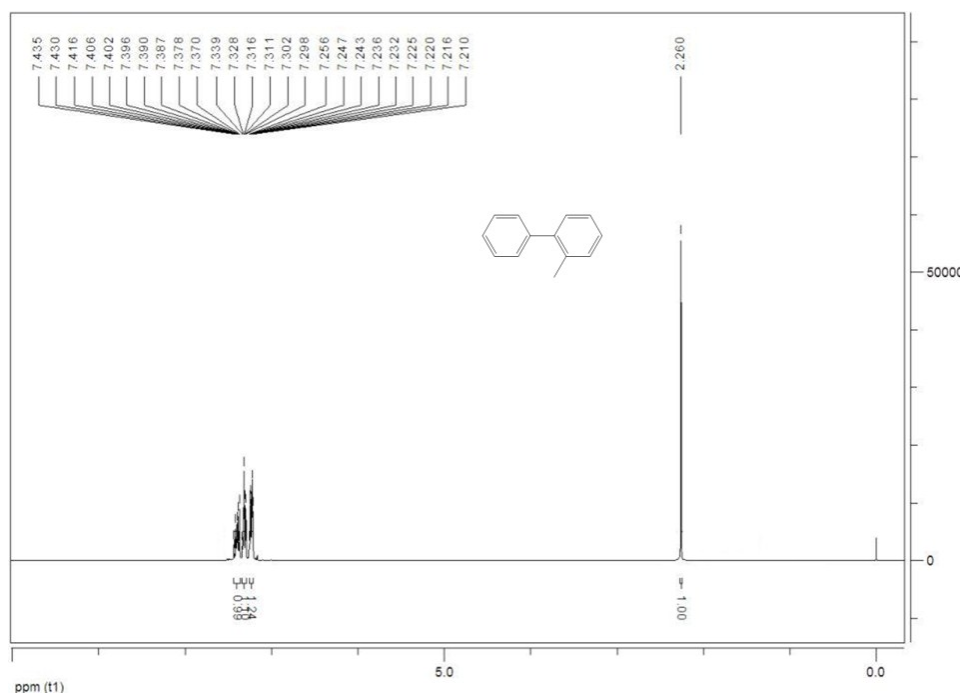

**Fig. S34** The  $^1\text{H}$  NMR (400 MHz,  $\text{CDCl}_3$ ) spectrum of 2-methylbiphenyl (**2m**).



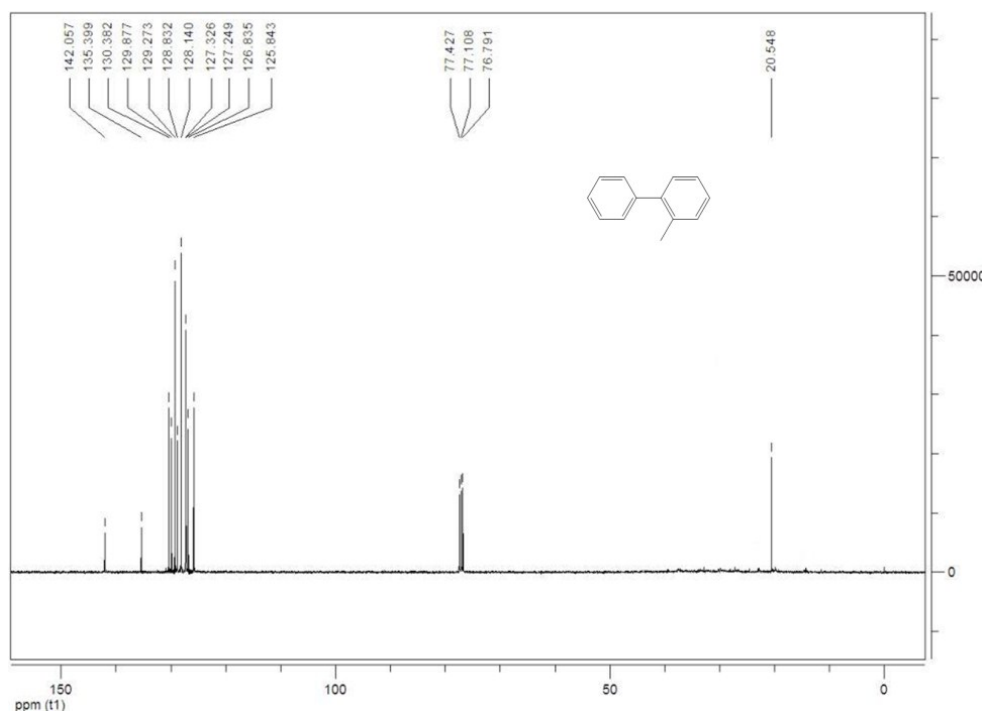

**Fig. S35** The  $^{13}\text{C}$  NMR (100 MHz,  $\text{CDCl}_3$ ) spectrum of 2-methylbiphenyl (**2m**).

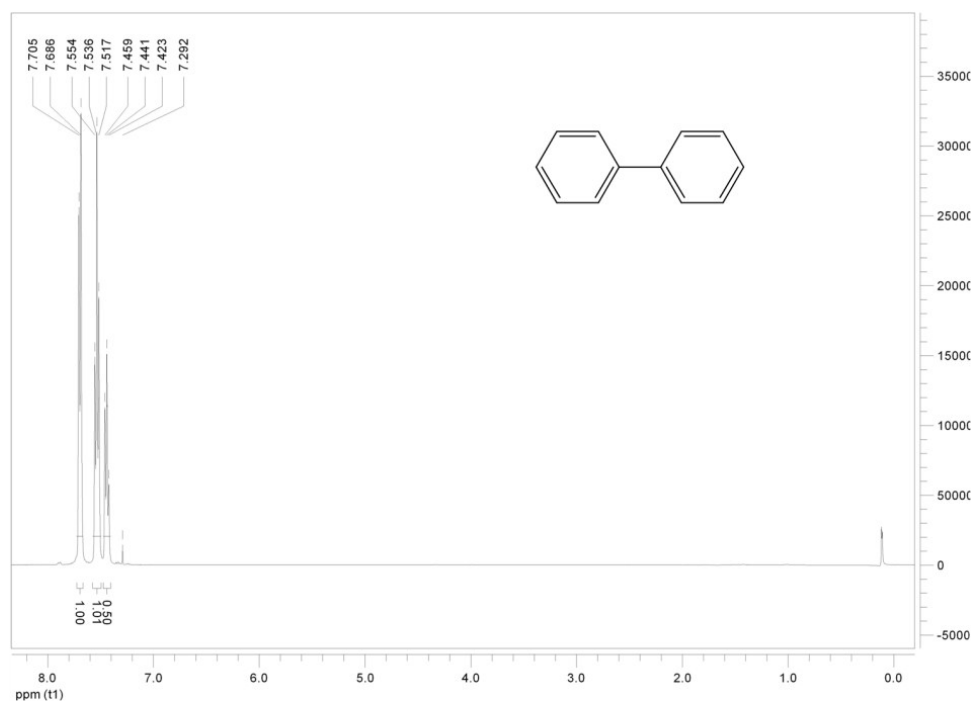

**Fig. S36** The  $^1\text{H}$  NMR (400 MHz,  $\text{CDCl}_3$ ) spectrum of biphenyl (**2n**).



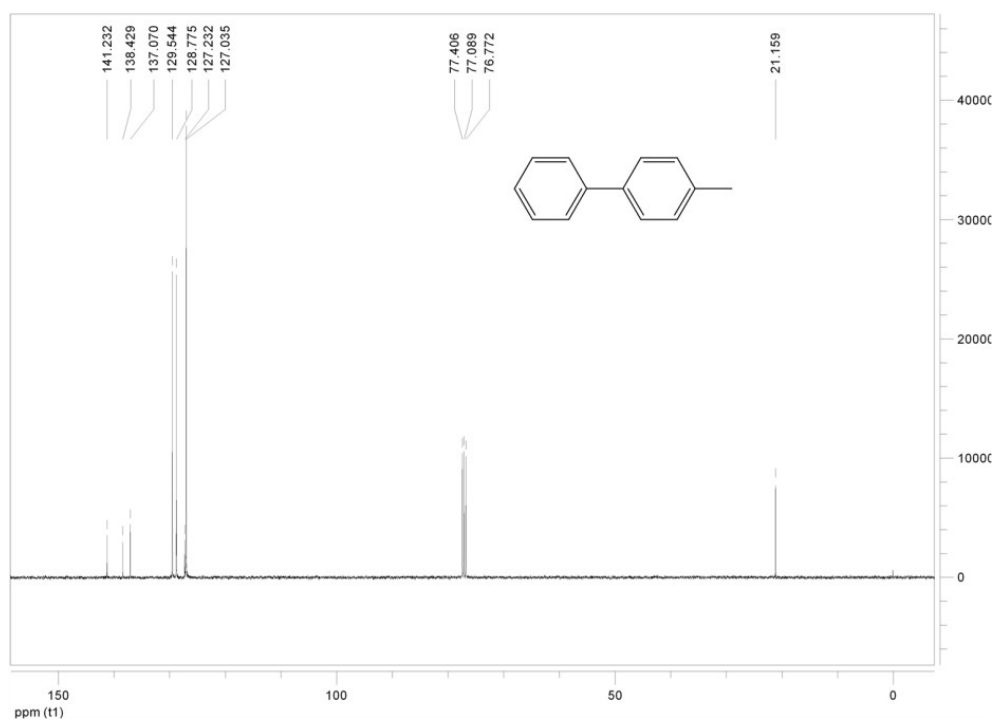

**Fig. S39** The  $^{13}\text{C}$  NMR (100 MHz,  $\text{CDCl}_3$ ) spectrum of 4-methylbiphenyl (**2o**).

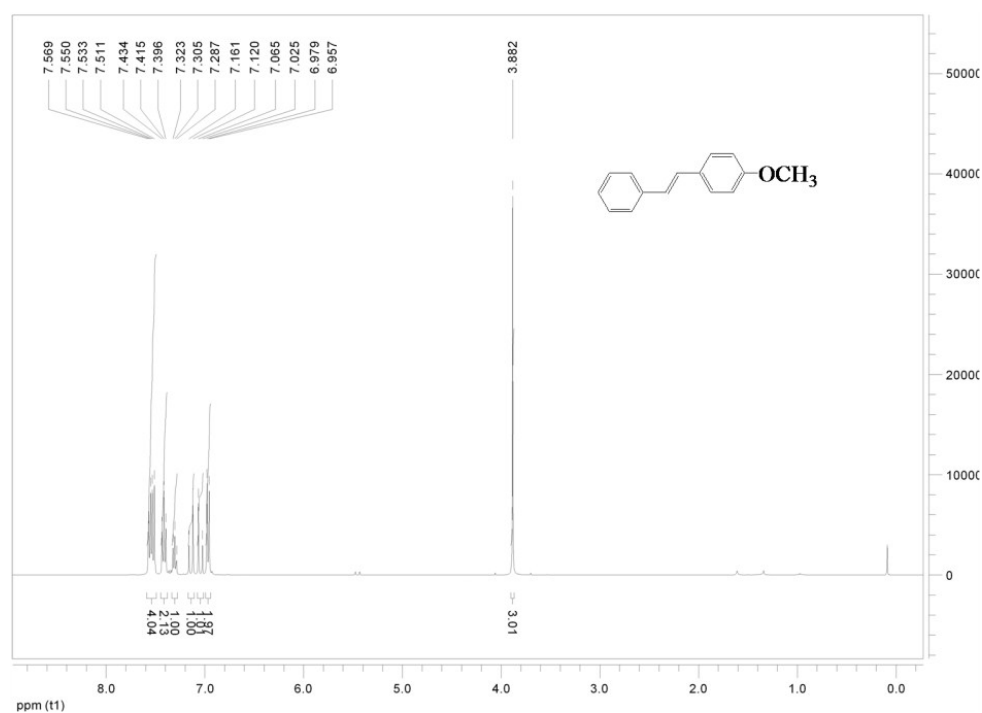

**Fig. S40** The  $^1\text{H}$  NMR (400 MHz,  $\text{CDCl}_3$ ) spectrum of 4-methoxystilbene (**3a**).

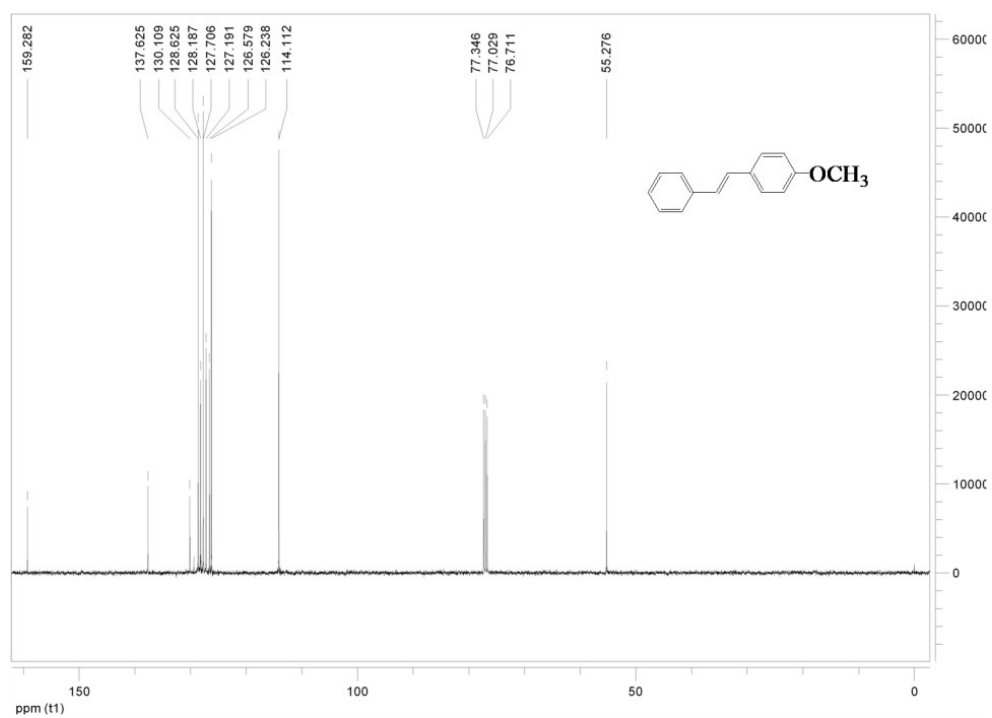

**Fig. S41** The  $^{13}\text{C}$  NMR (100 MHz,  $\text{CDCl}_3$ ) spectrum of 4-methoxystilbene (**3a**).

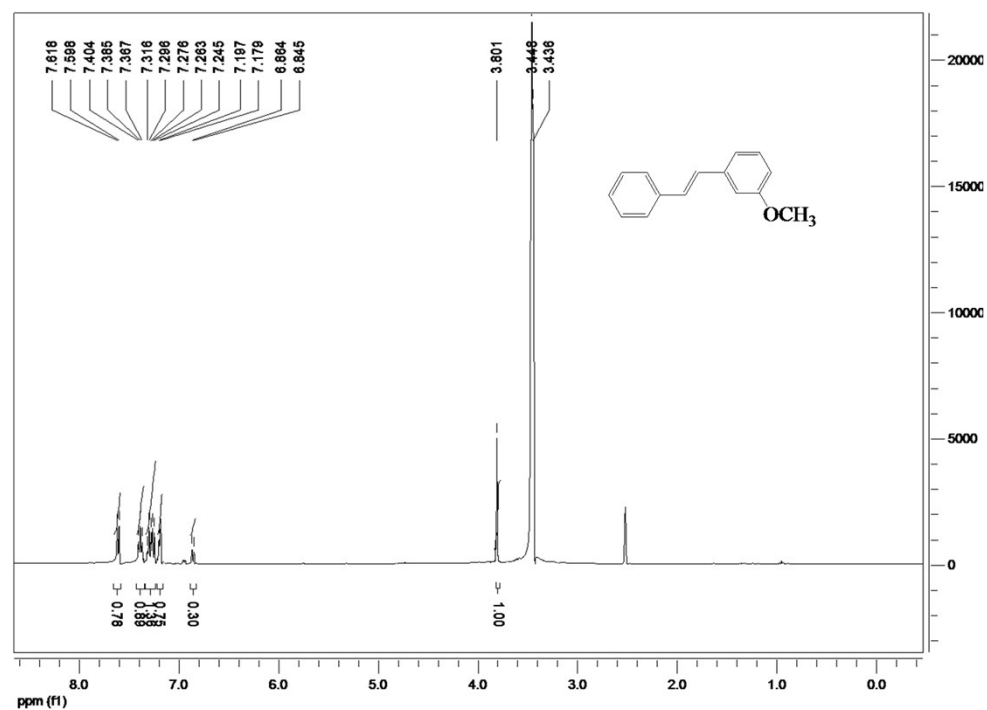

**Fig. S42** The  $^1\text{H}$  NMR (400 MHz,  $\text{DMSO}-d_6$ ) spectrum of 3-methoxystilbene (**3b**).

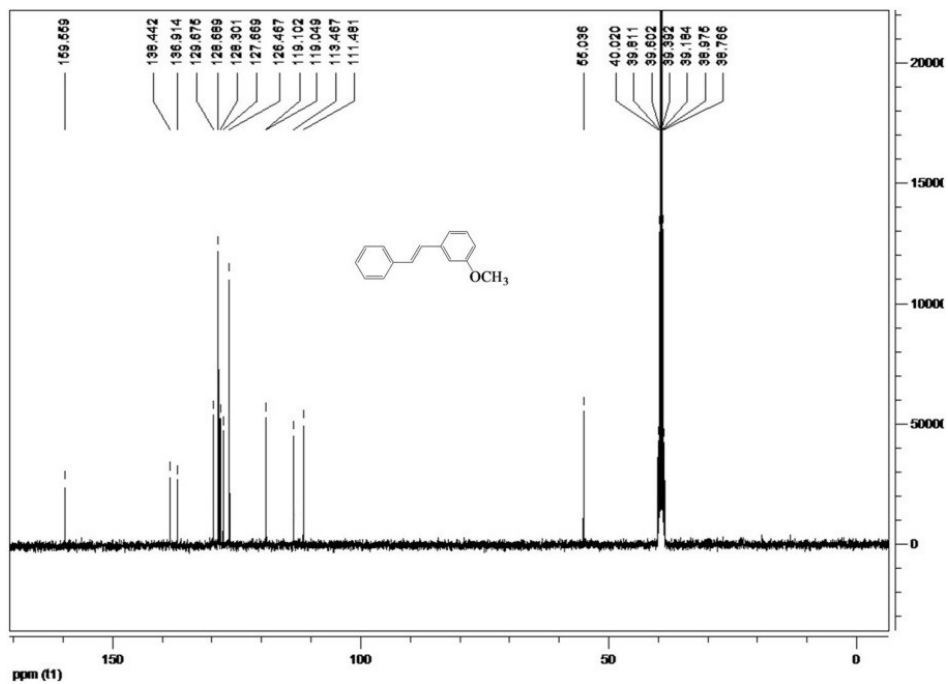

Fig. S43 The  $^{13}\text{C}$  NMR (100 MHz,  $\text{DMSO-}d_6$ ) spectrum of 3-methoxystilbene (**3b**).

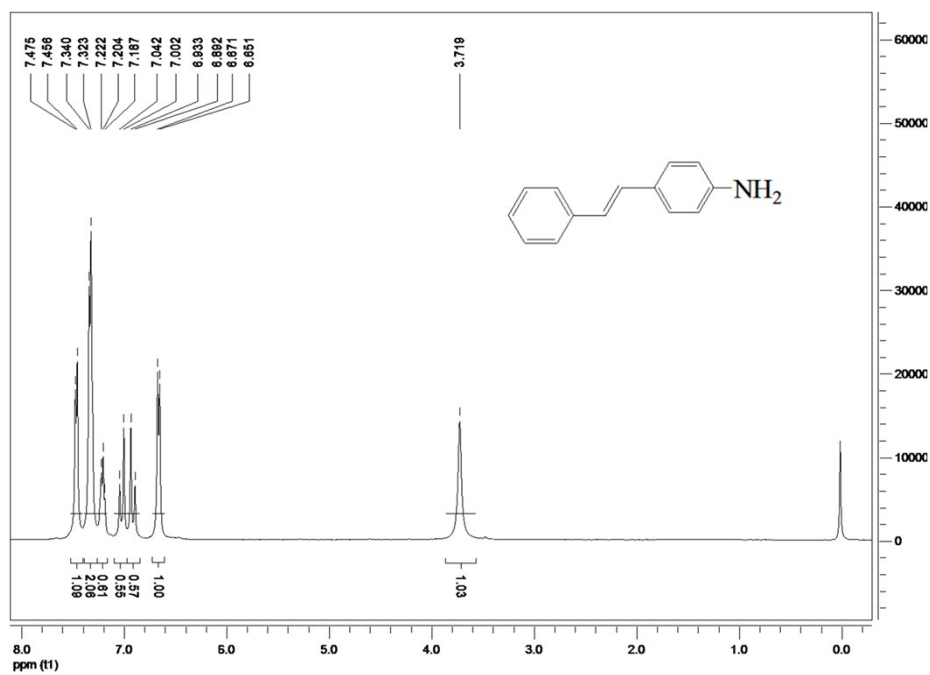

Fig. S44 The  $^1\text{H}$  NMR (400 MHz,  $\text{CDCl}_3$ ) spectrum of 4-anilinstilbene (**3c**).

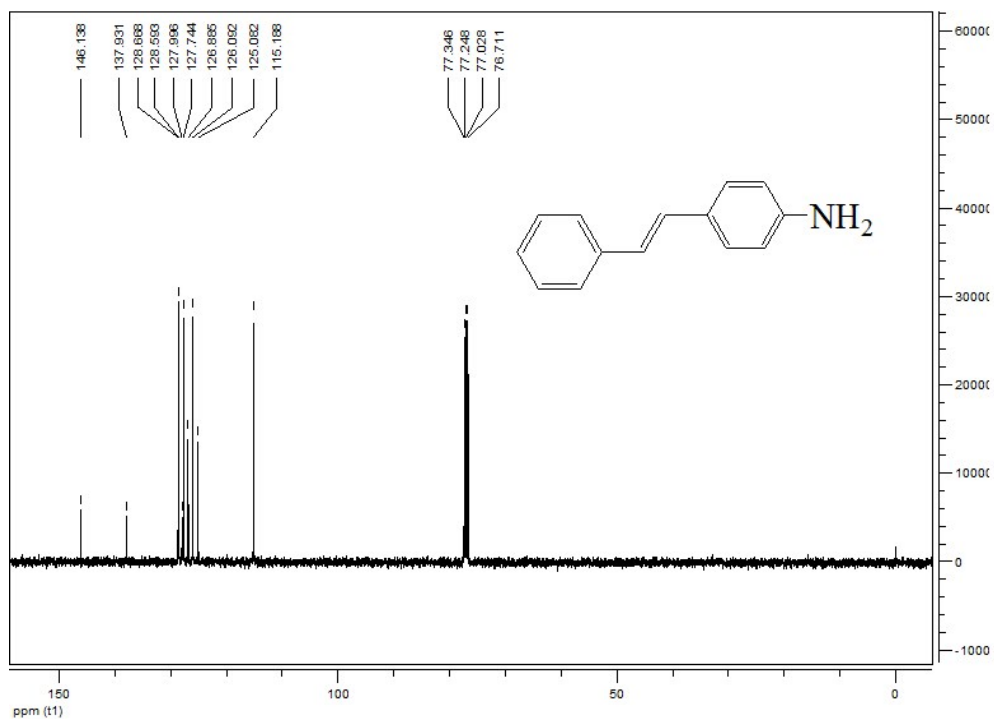

Fig. S45 The  $^{13}\text{C}$  NMR (100 MHz,  $\text{CDCl}_3$ ) spectrum of 4-anilinstilbene (**3c**).

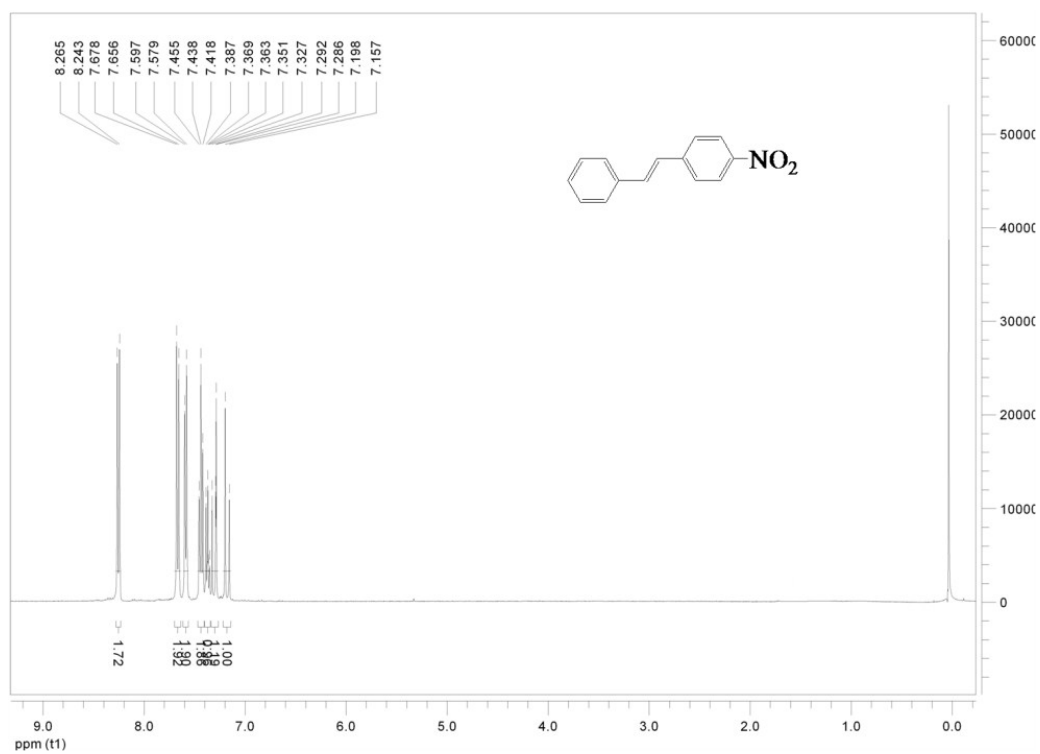

Fig. S46 The  $^1\text{H}$  NMR (400 MHz,  $\text{CDCl}_3$ ) spectrum of 4-nitrostilbene (**3d**).

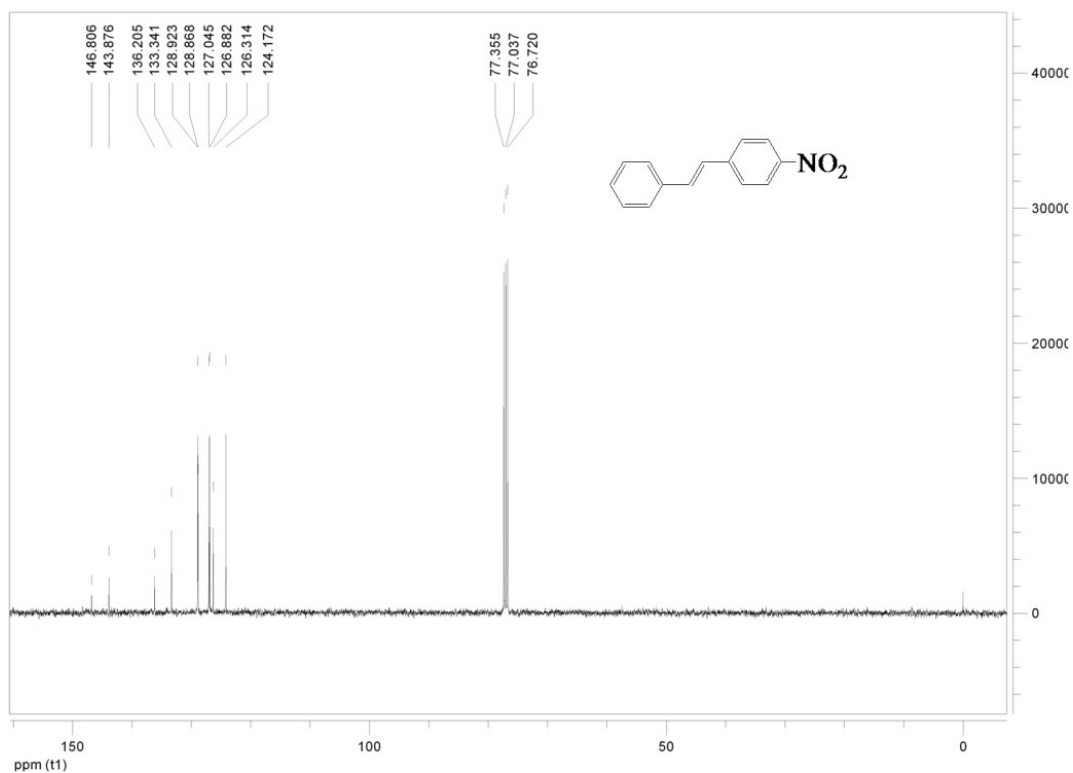

**Fig. S47** The  $^{13}\text{C}$  NMR (100 MHz,  $\text{CDCl}_3$ ) spectrum of 4-nitrostilbene (**3d**).

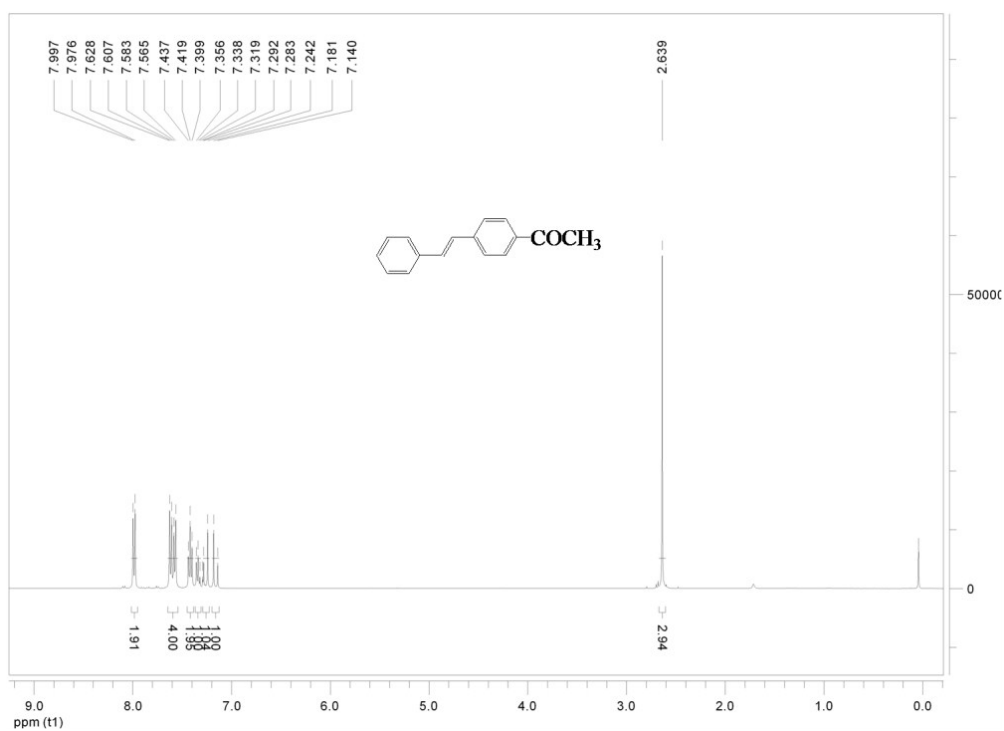

**Fig. S48** The  $^1\text{H}$  NMR (400 MHz,  $\text{CDCl}_3$ ) spectrum of 4-acetylstilbene (**3e**).

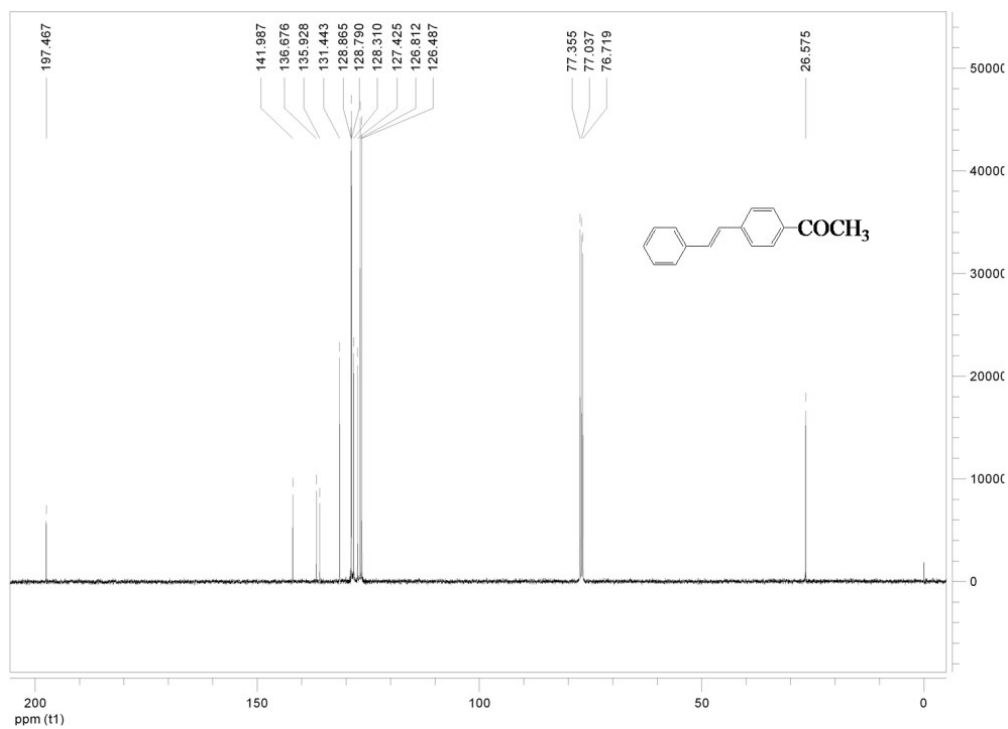

**Fig. S49** The  $^{13}\text{C}$  NMR (100 MHz,  $\text{CDCl}_3$ ) spectrum of 4-acetylstilbene (**3e**).

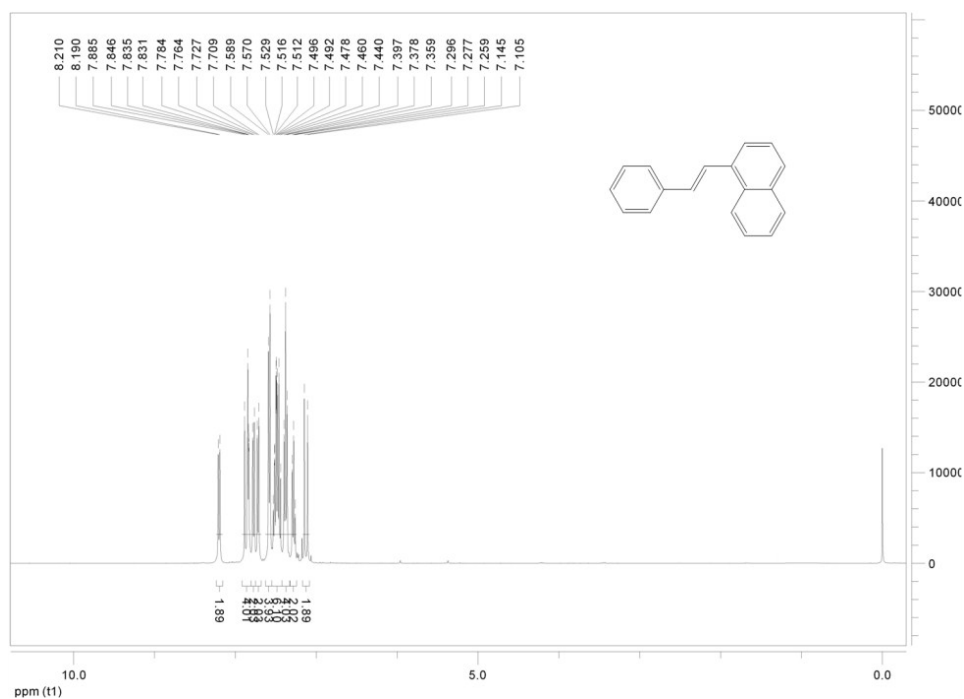

**Fig. S50** The  $^1\text{H}$  NMR (400 MHz,  $\text{CDCl}_3$ ) spectrum of 1-styrylnaphthalene (**3f**).



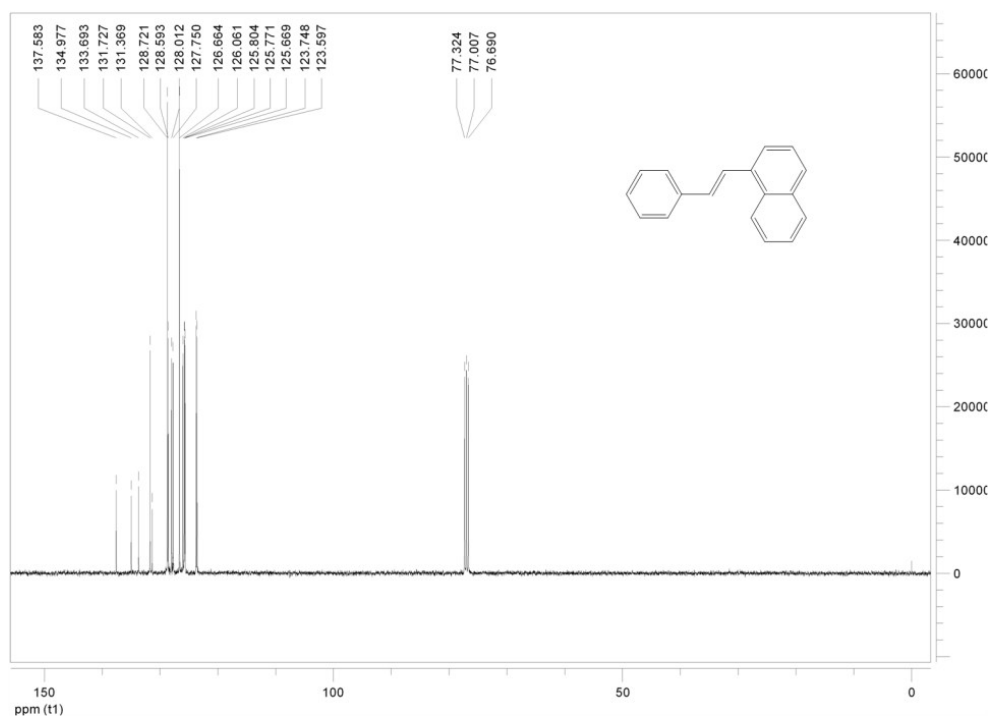

**Fig. S51** The  $^{13}\text{C}$  NMR (100 MHz,  $\text{CDCl}_3$ ) spectrum of 1-styrylnaphthalene (**3f**).

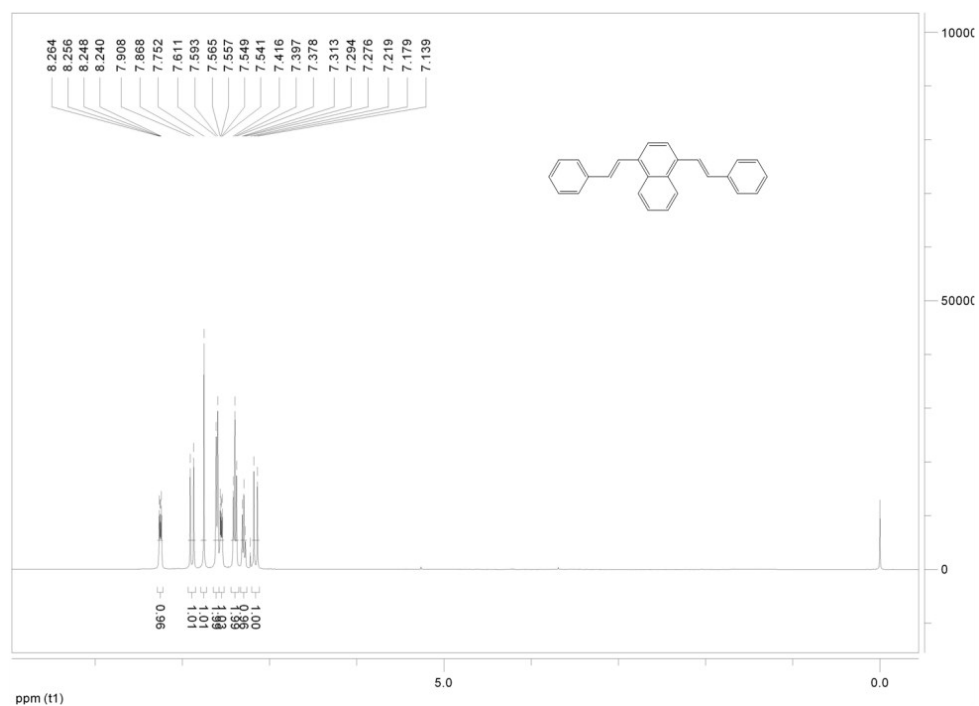

**Fig. S52** The  $^1\text{H}$  NMR (400 MHz,  $\text{CDCl}_3$ ) spectrum of 1,4-distyrylnaphthalene (**3g**).

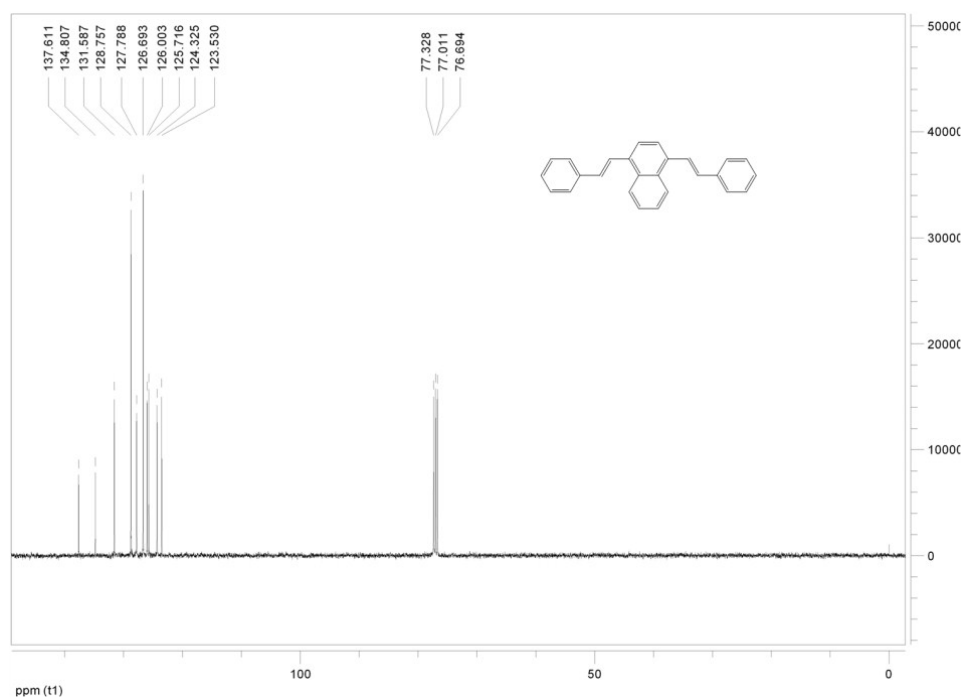

**Fig. S53** The  $^{13}\text{C}$  NMR (100 MHz,  $\text{CDCl}_3$ ) spectrum of 1,4-distyrylnaphthalene (**3g**).

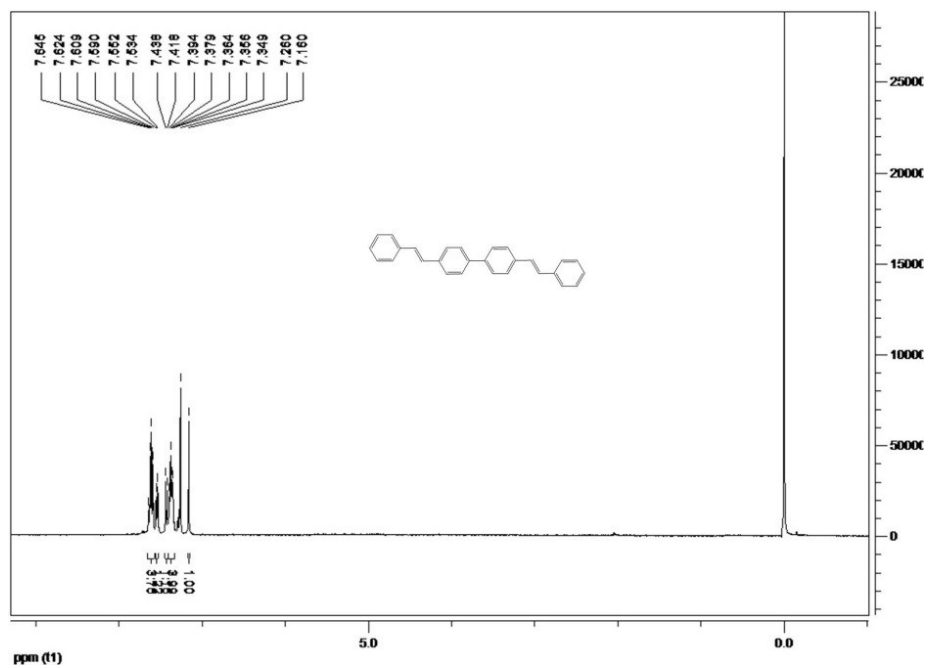

**Fig. S54** The  $^1\text{H}$  NMR (400 MHz,  $\text{CDCl}_3$ ) spectrum of 4, 4'-bis(2-phenylethenyl)-bipheny (**3h**).

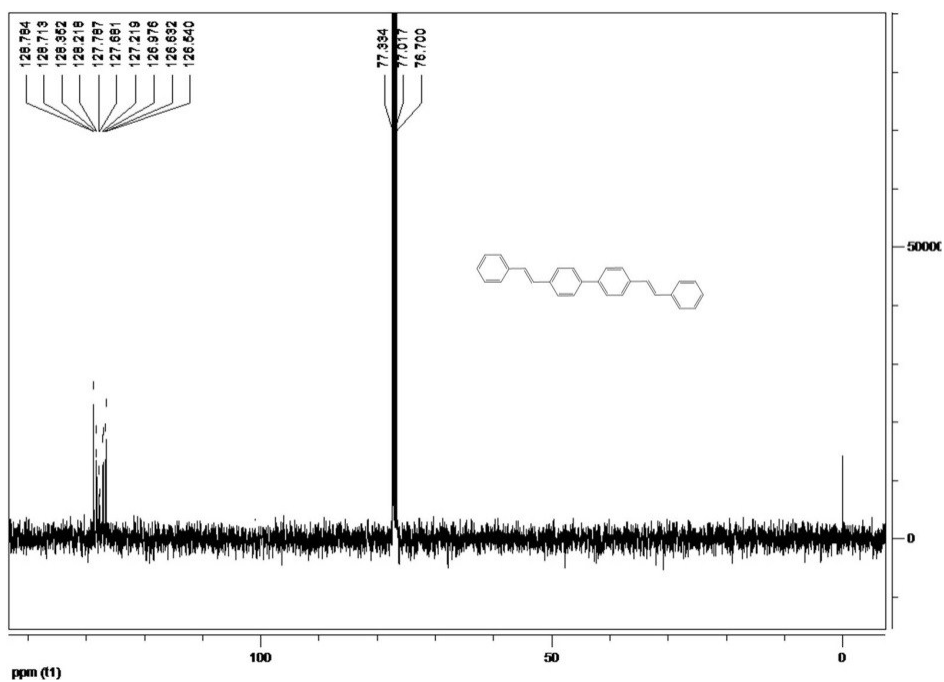

**Fig. S55** The  $^{13}\text{C}$  NMR (100 MHz,  $\text{CDCl}_3$ ) spectrum of 4, 4'-bis(2-phenylethenyl)-bipheny (**3h**).

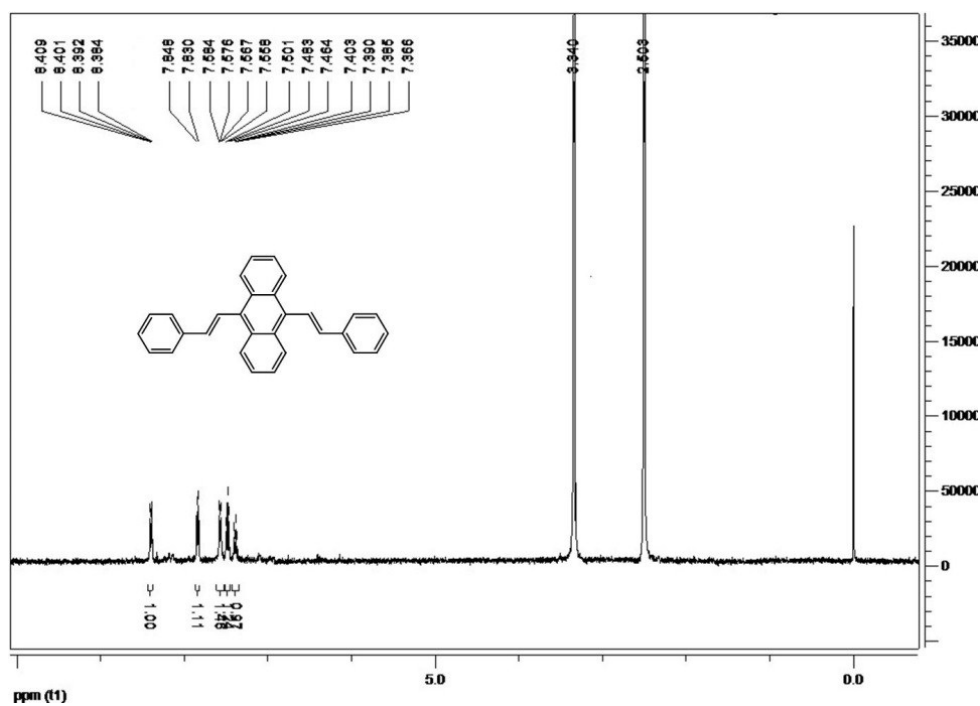

**Fig. S56** The  $^1\text{H}$  NMR (400 MHz,  $\text{DMSO}-d_6$ ) spectrum of 9, 10-bis(2-phenylethenyl)-anthracene (**3i**).

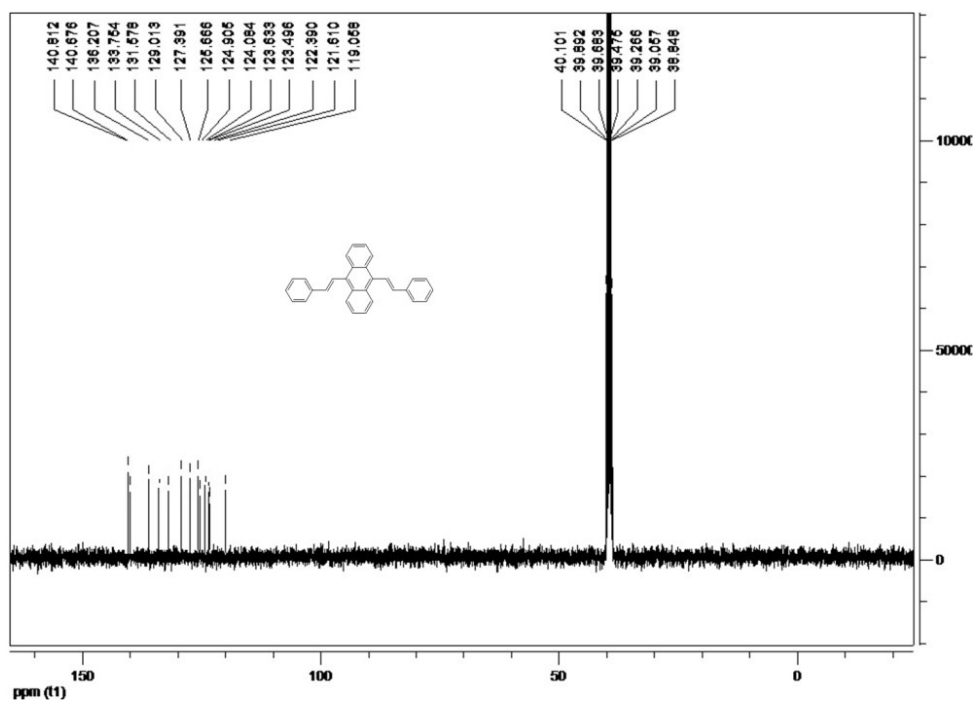

**Fig. S57** The  $^{13}\text{C}$  NMR (100 MHz,  $\text{DMSO-}d_6$ ) spectrum of 9, 10-bis(2-phenylethenyl)-anthracene (**3i**).

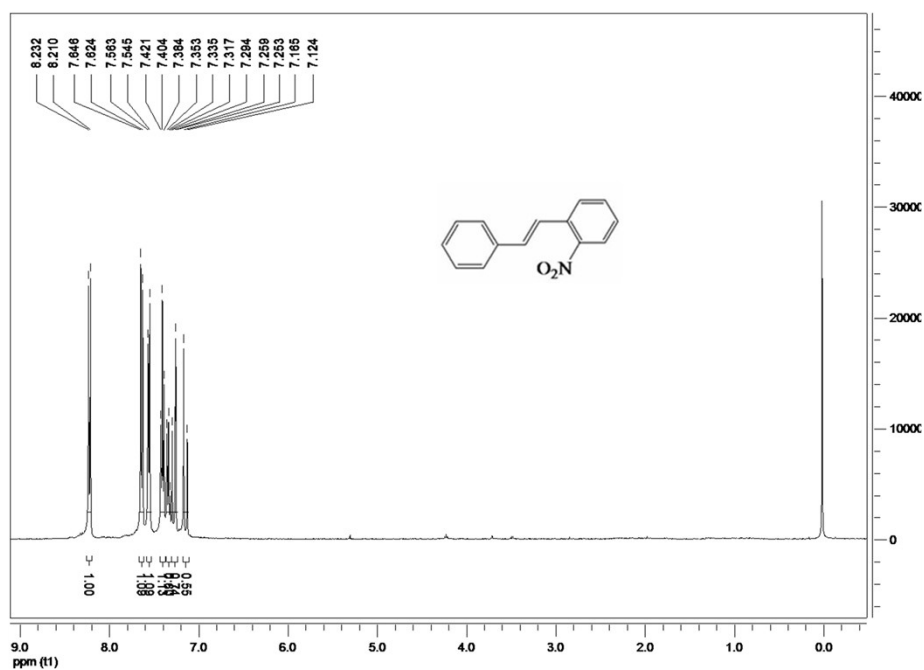

**Fig. S58** The  $^1\text{H}$  NMR (400 MHz,  $\text{CDCl}_3$ ) spectrum of 1-nitro-2-(2-phenylethenyl)-stilbene (**3j**).

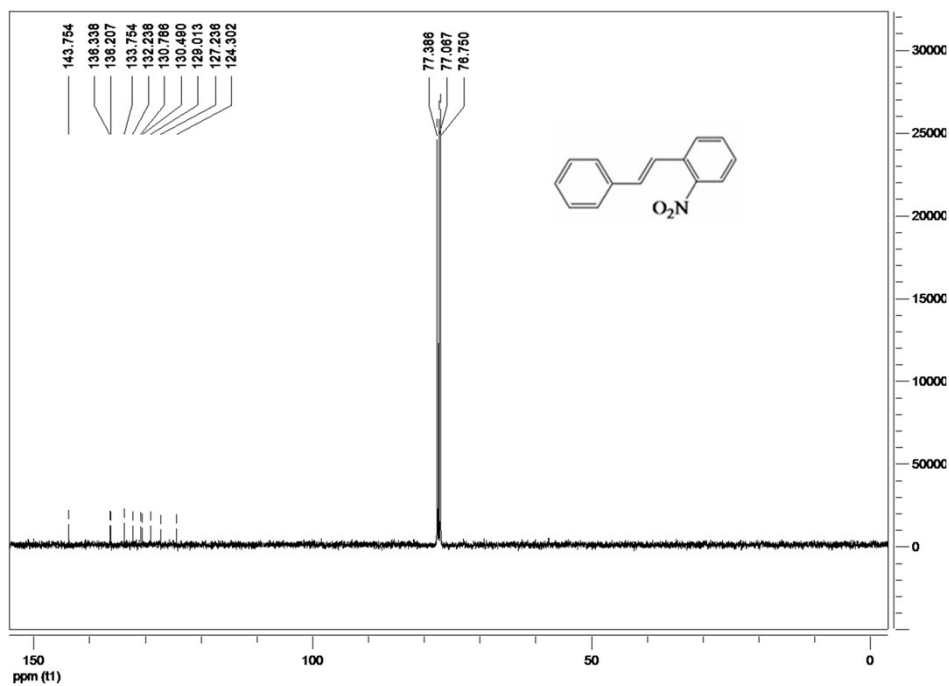

**Fig. S59** The  $^{13}\text{C}$  NMR (100 MHz,  $\text{CDCl}_3$ ) spectrum of 1-nitro-2-(2-phenylethenyl)-stilbene (**3j**).

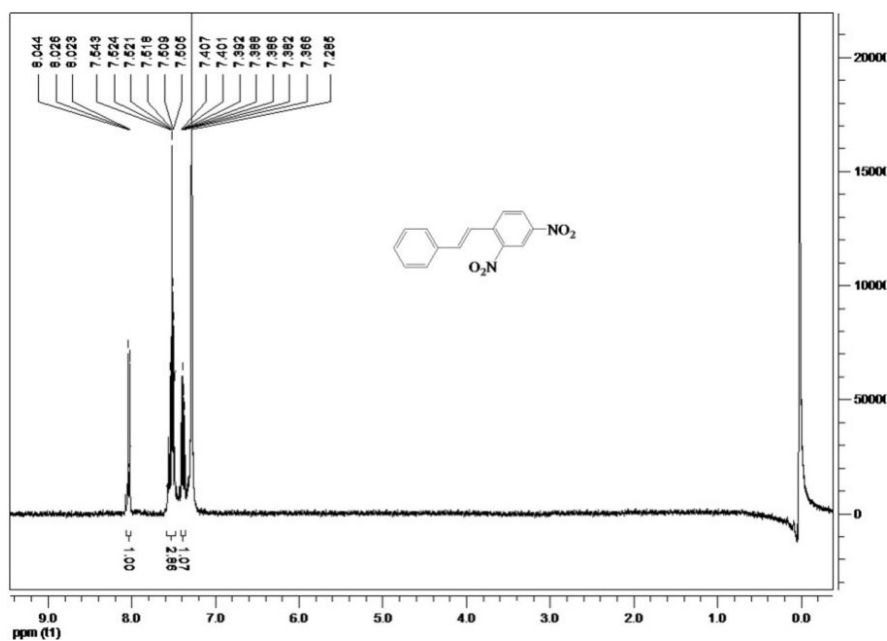

**Fig. S60** The  $^1\text{H}$  NMR (400 MHz,  $\text{CDCl}_3$ ) spectrum of 2,4-dinitro-1-(2-phenylethenyl)-stilbene (**3k**).

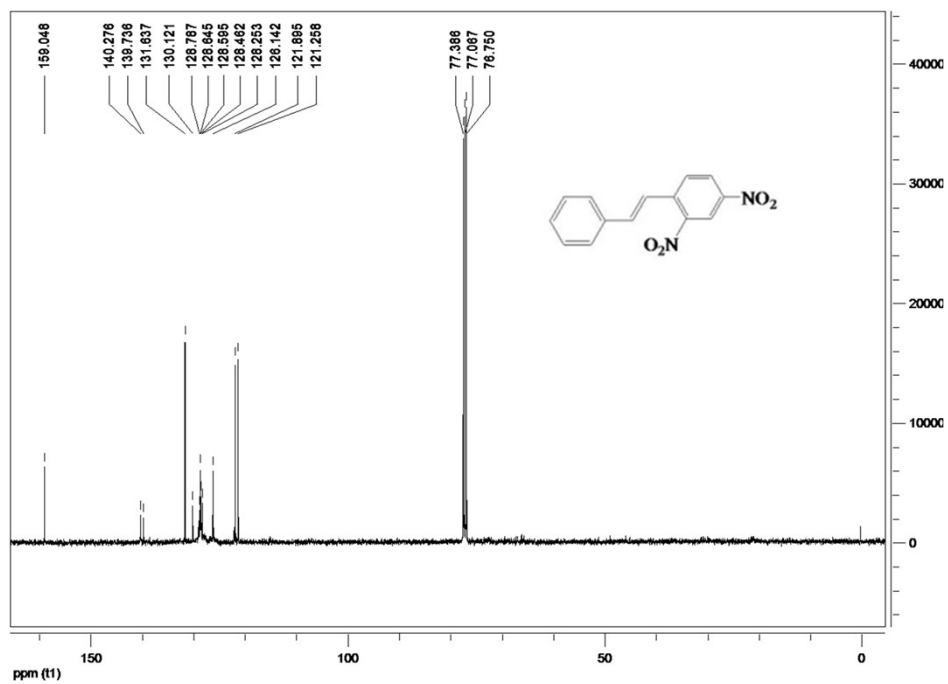

**Fig. S61** The  $^{13}\text{C}$  NMR (100 MHz,  $\text{CDCl}_3$ ) spectrum of 2, 4-dinitro-1-(2-phenylethenyl)-stilbene (**3k**).

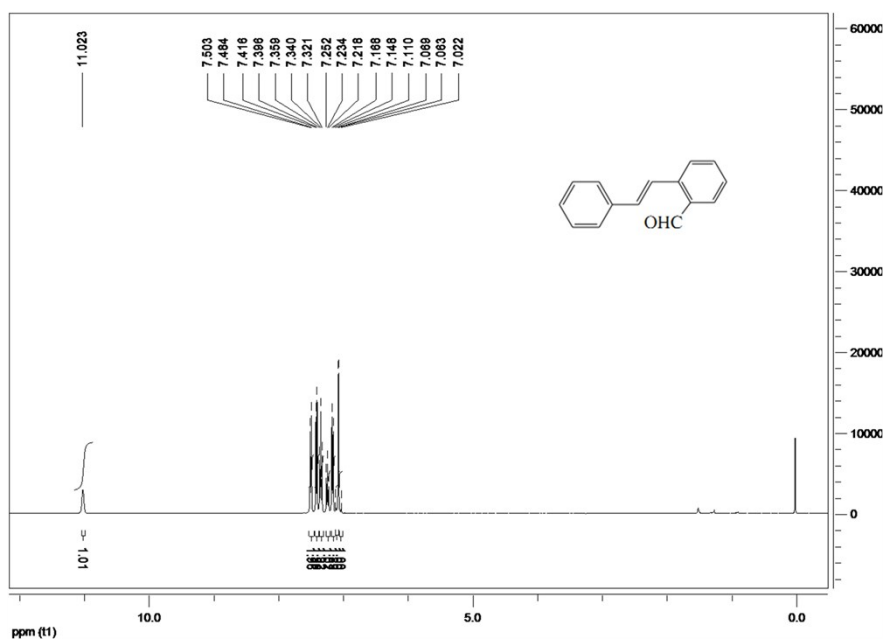

**Fig. S62** The  $^1\text{H}$  NMR (400 MHz,  $\text{CDCl}_3$ ) spectrum of 2-(2-phenylethenyl)-stilbene (**3l**).

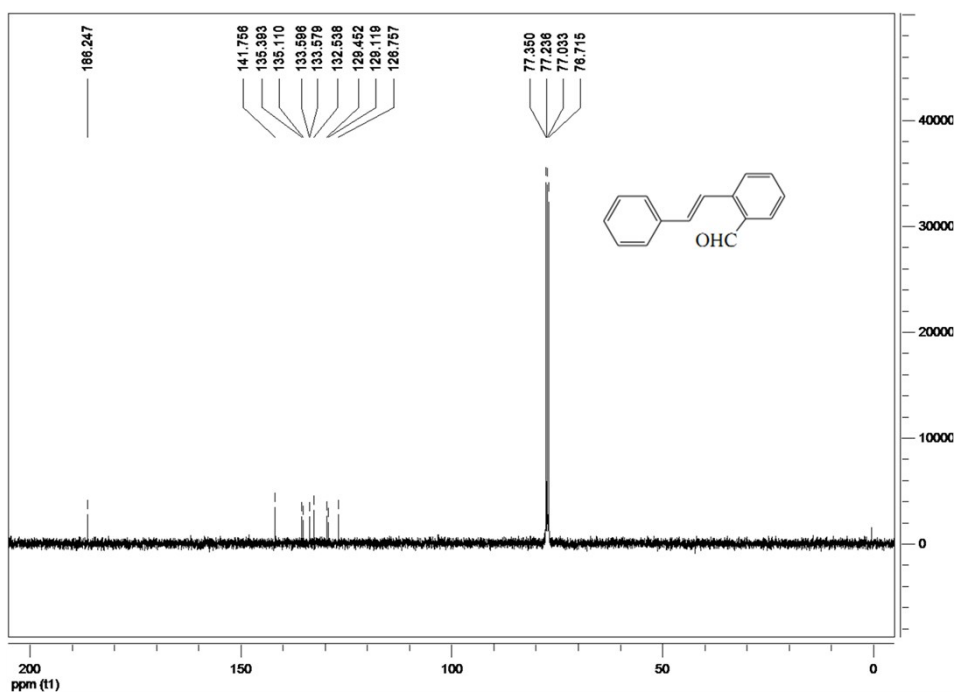

**Fig. S63** The  $^{13}\text{C}$  NMR (100 MHz,  $\text{CDCl}_3$ ) spectrum of 2-(2-phenylethenyl)-stilbene (**3l**).

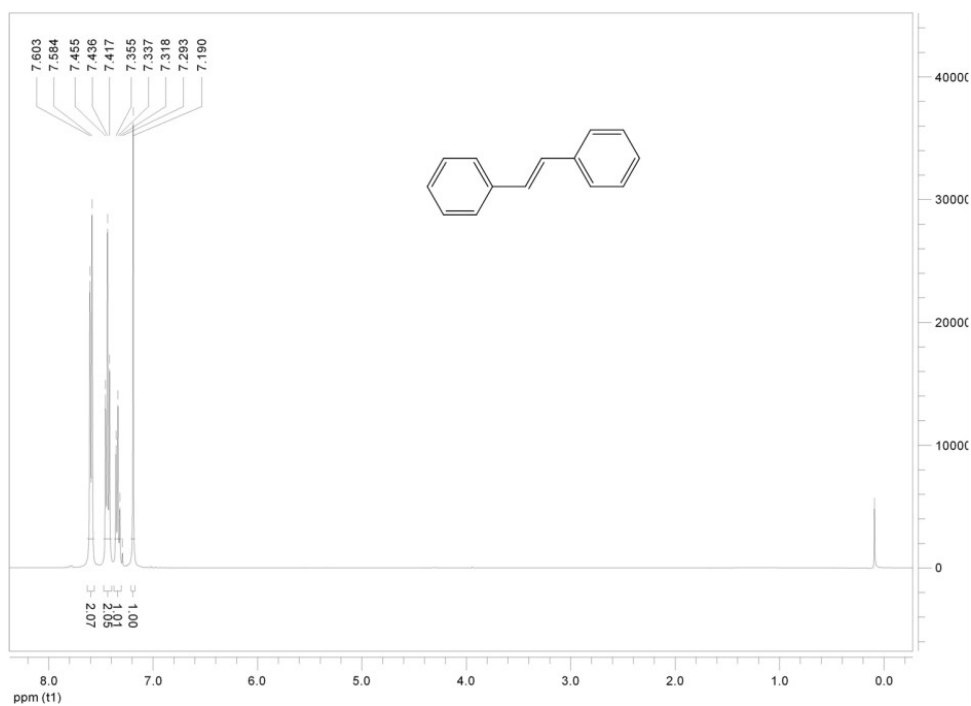

**Fig. S64** The  $^1\text{H}$  NMR (400 MHz,  $\text{CDCl}_3$ ) spectrum of stilbene (**3n**).

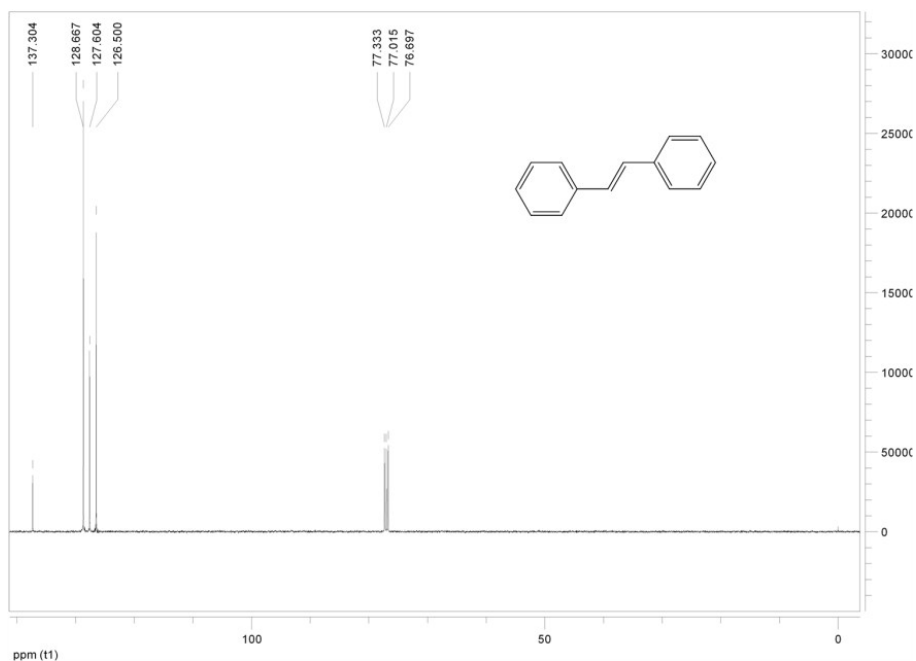

**Fig. S65** The  $^{13}\text{C}$  NMR (100 MHz,  $\text{CDCl}_3$ ) spectrum of stilbene (**3n**).

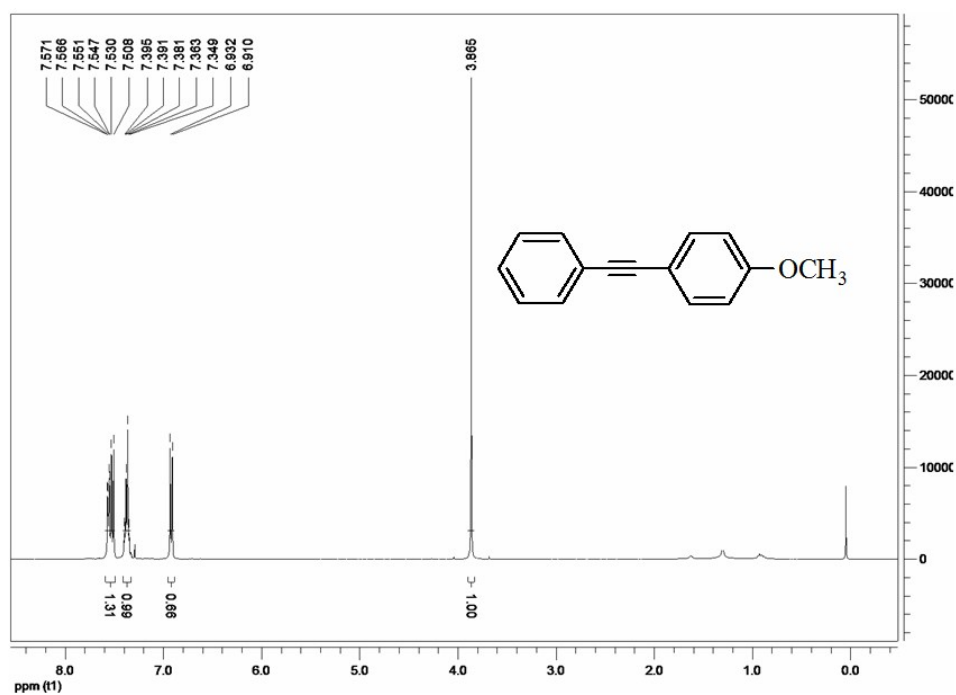

**Fig. S66** The  $^1\text{H}$  NMR (400 MHz,  $\text{CDCl}_3$ ) spectrum of 1-(4-Methoxyphenyl)-2-phenylacetylene (**4a**).





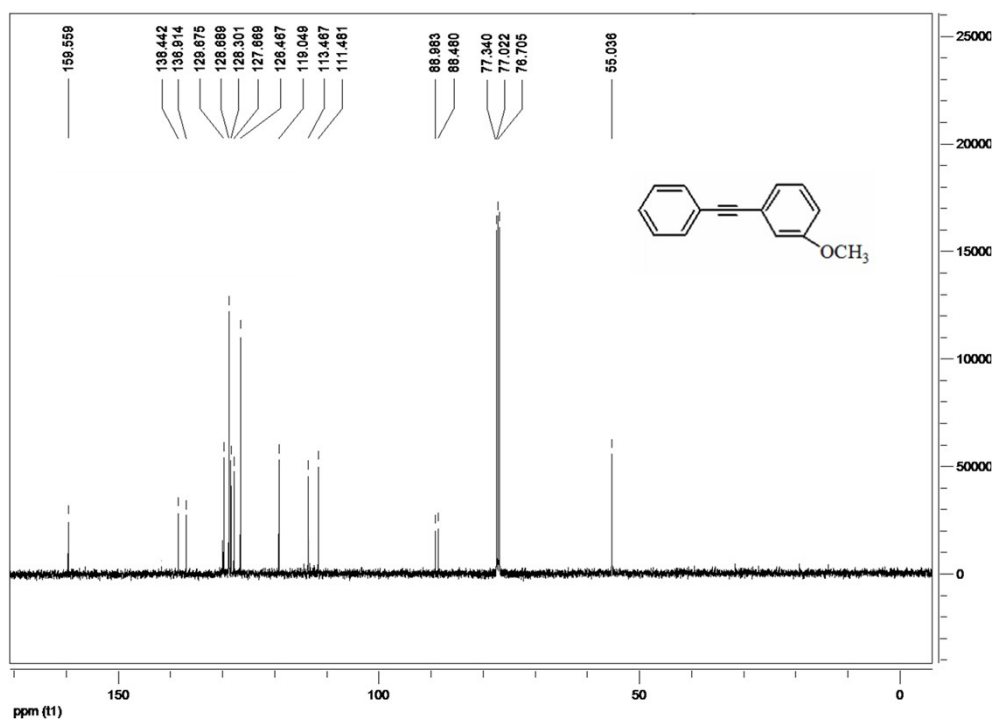

**Fig. S69** The  $^{13}\text{C}$  NMR (100 MHz,  $\text{CDCl}_3$ ) spectrum of 1-(3-Methoxyphenyl)-2-phenylacetylene (**4b**).

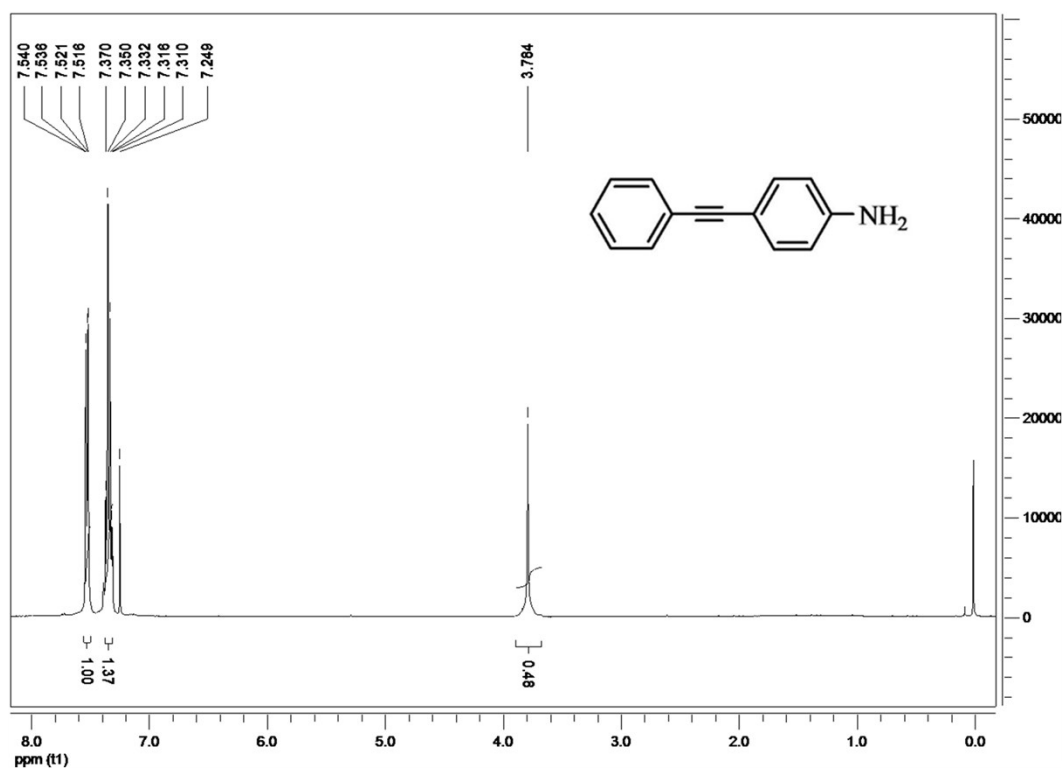

**Fig. S70** The  $^1\text{H}$  NMR (400 MHz,  $\text{CDCl}_3$ ) spectrum of 4-(2-phenylethynyl)-aniline (**4c**).

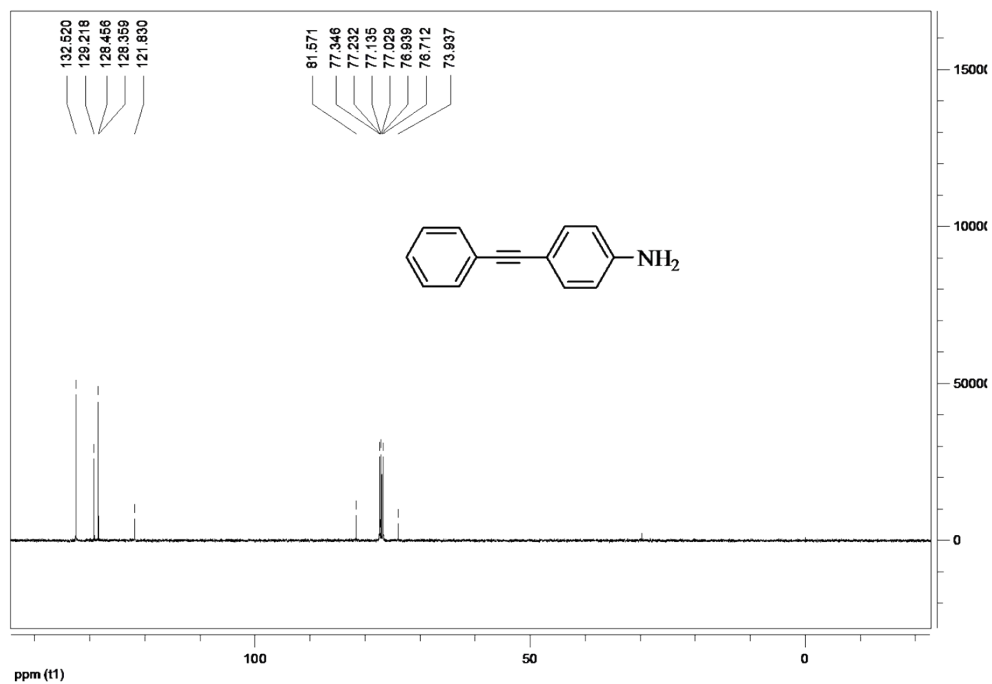

**Fig. S71** The  $^{13}\text{C}$  NMR (100 MHz,  $\text{CDCl}_3$ ) spectrum of 4-(2-phenylethynyl)-aniline (**4c**).

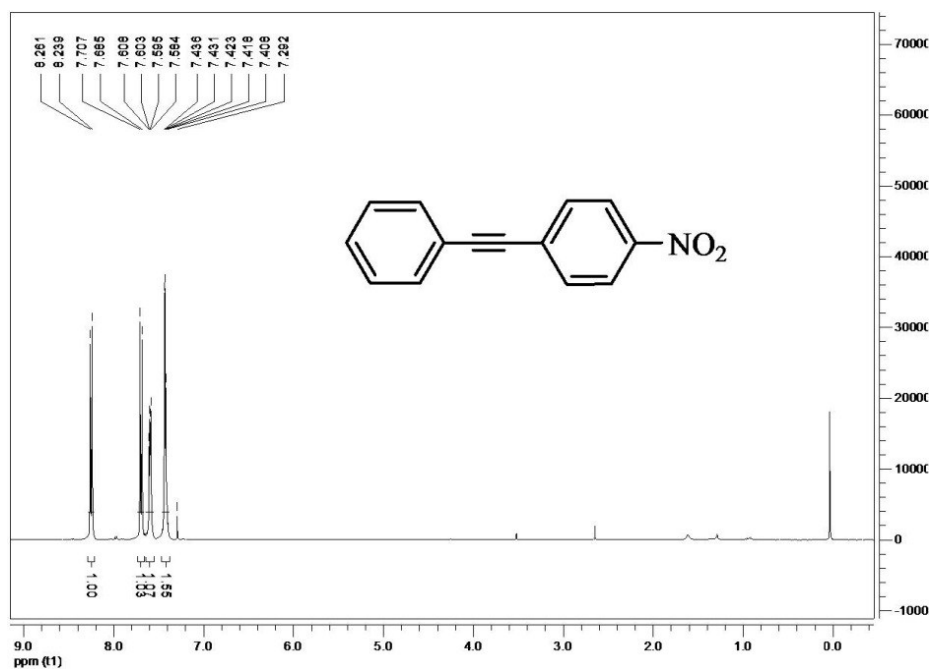

**Fig. S72** The  $^1\text{H}$  NMR (400 MHz,  $\text{CDCl}_3$ ) spectrum of 1-(4-nitrophenyl)-2-phenylacetylene (**4d**).

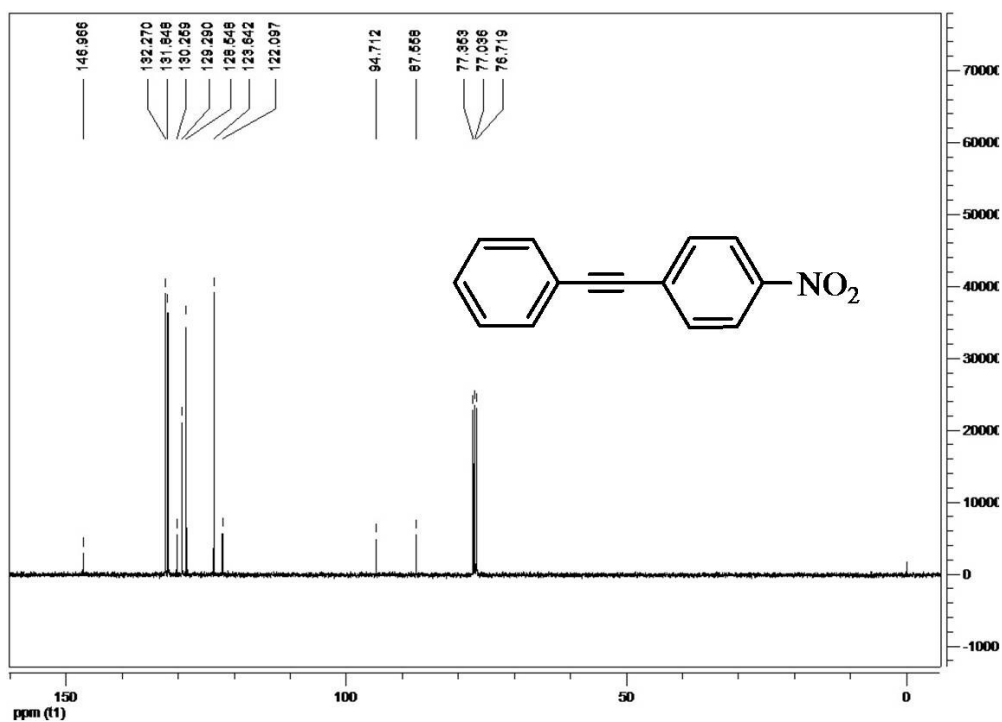

**Fig. S73** The  $^{13}\text{C}$  NMR (100 MHz,  $\text{CDCl}_3$ ) spectrum of 1-(4-nitrophenyl)-2-phenylacetylene (**4d**).

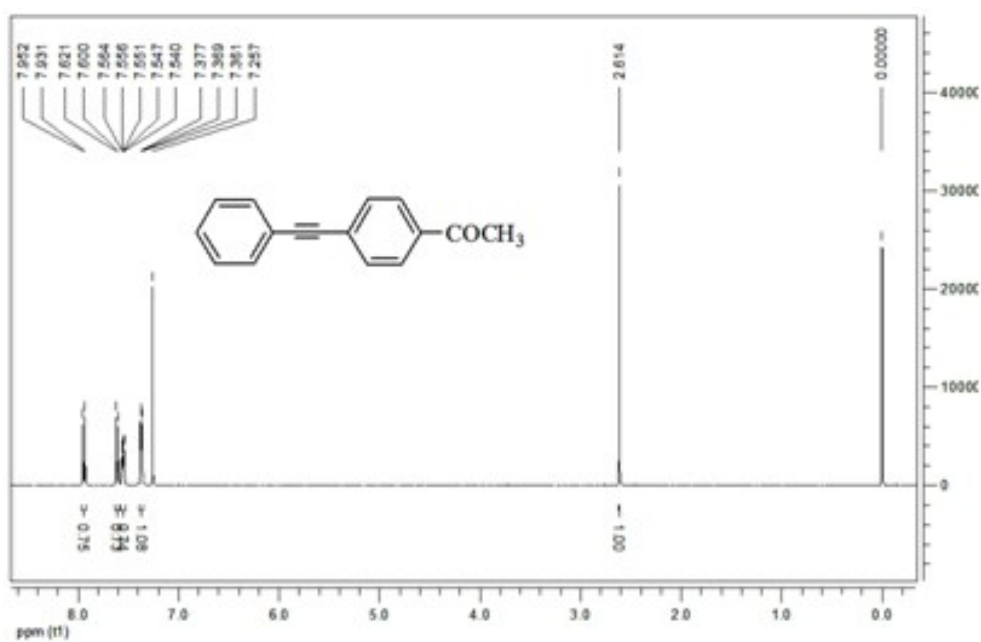

**Fig. S74** The  $^1\text{H}$  NMR (400 MHz,  $\text{CDCl}_3$ ) spectrum of 1-(4-acetylphenyl)-2-phenylacetylene (**4e**).

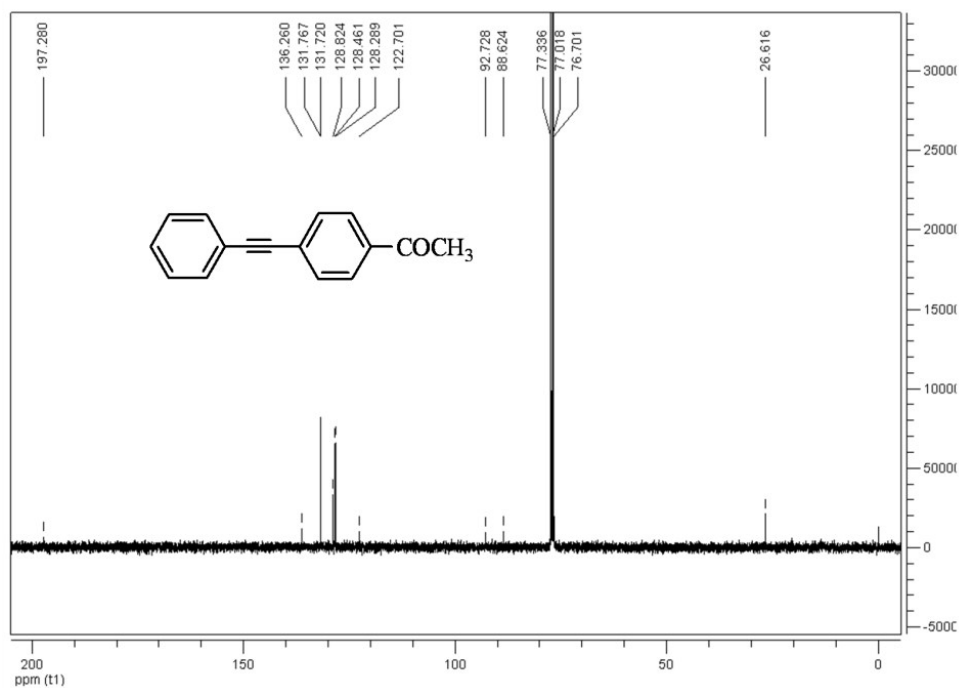

**Fig. S75** The  $^{13}\text{C}$  NMR (100 MHz,  $\text{CDCl}_3$ ) spectrum of 1-(4-acetylphenyl)-2-phenylacetylene (**4e**).

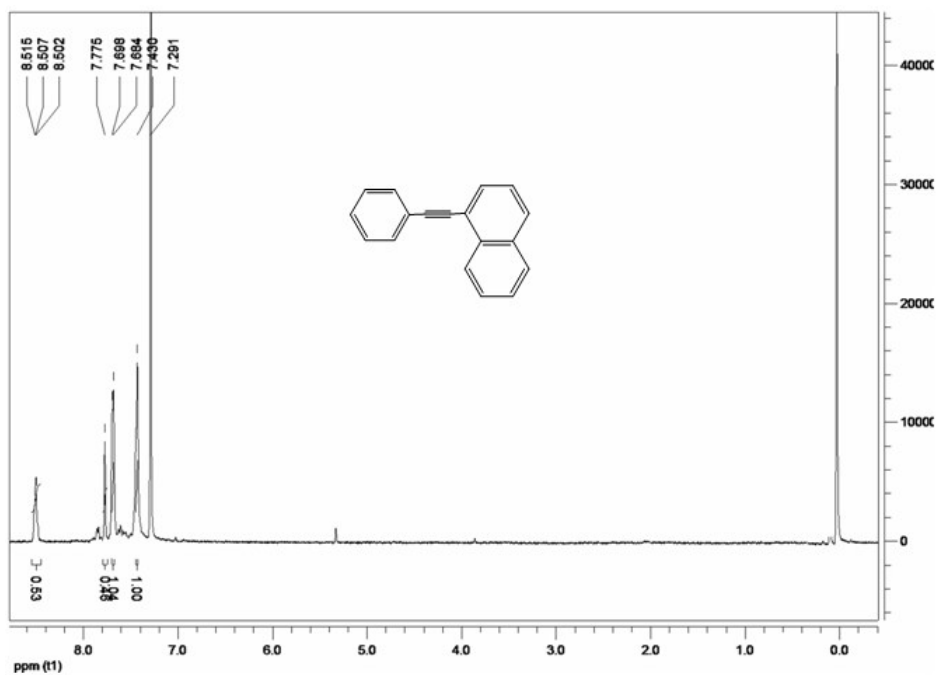

**Fig. S76** The  $^1\text{H}$  NMR (400 MHz,  $\text{CDCl}_3$ ) spectrum of 1-(2-phenylethynyl)naphthalene (**4f**).

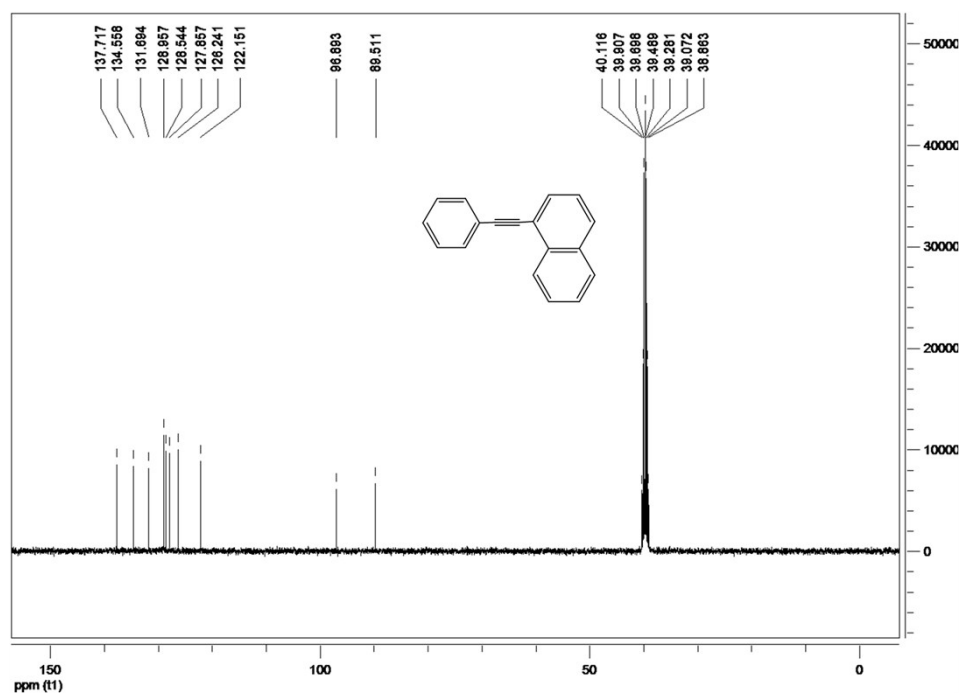

**Fig. S77** The  $^{13}\text{C}$  NMR (100 MHz,  $\text{CDCl}_3$ ) spectrum of 1-(2-phenylethynyl)naphthalene (**4f**).

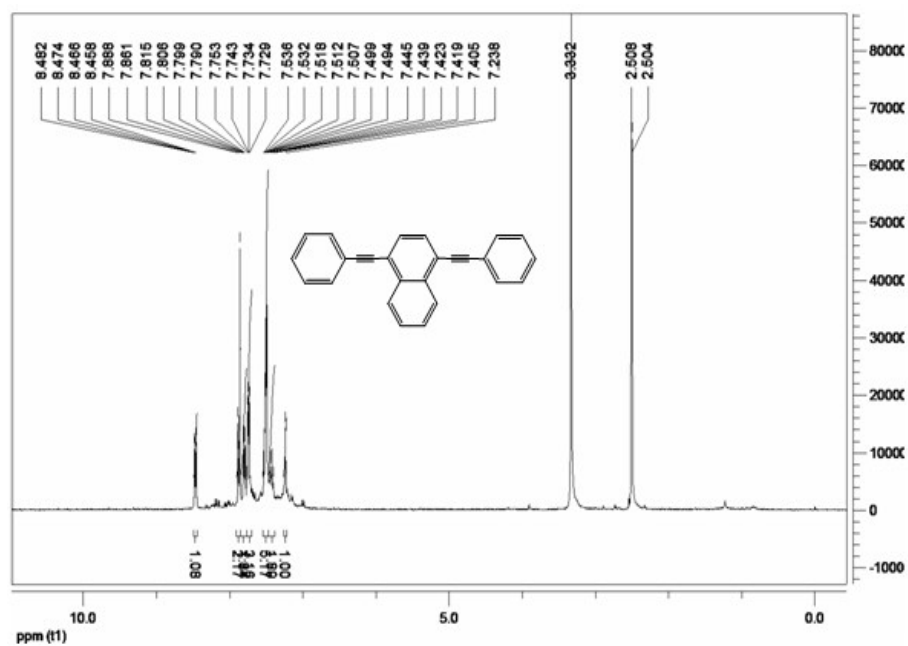

**Fig. S78** The  $^1\text{H}$  NMR (400 MHz,  $\text{DMSO}-d_6$ ) spectrum of 1,4-bis(2-phenylethynyl)naphthalene (**4g**).

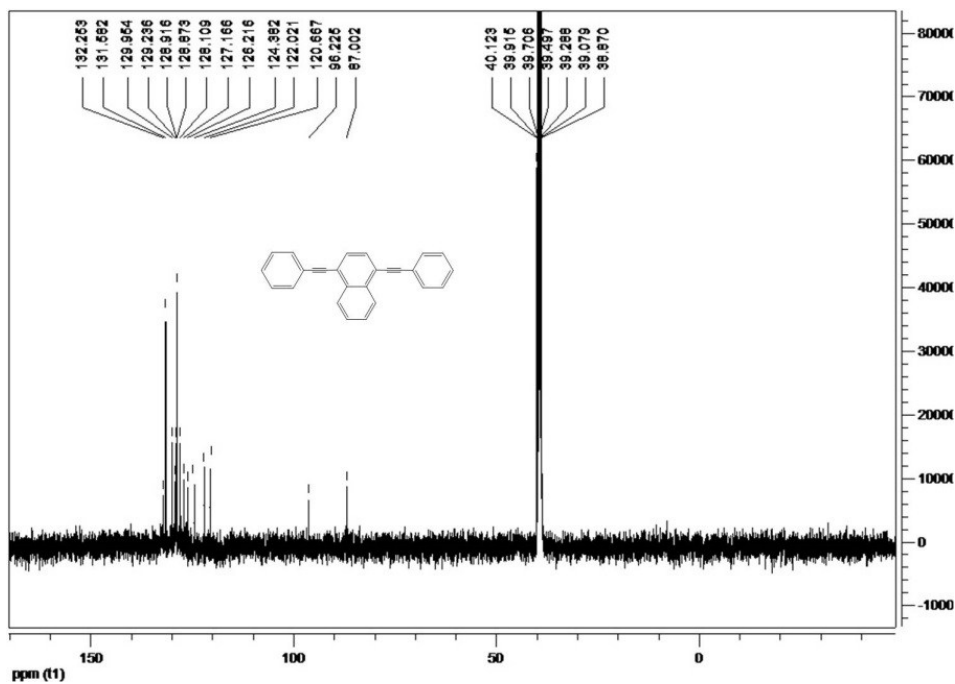

**Fig. S79** The  $^{13}\text{C}$  NMR (100 MHz,  $\text{DMSO-}d_6$ ) spectrum of 1,4-bis(2-phenylethynyl)-naphthalene (**4g**).

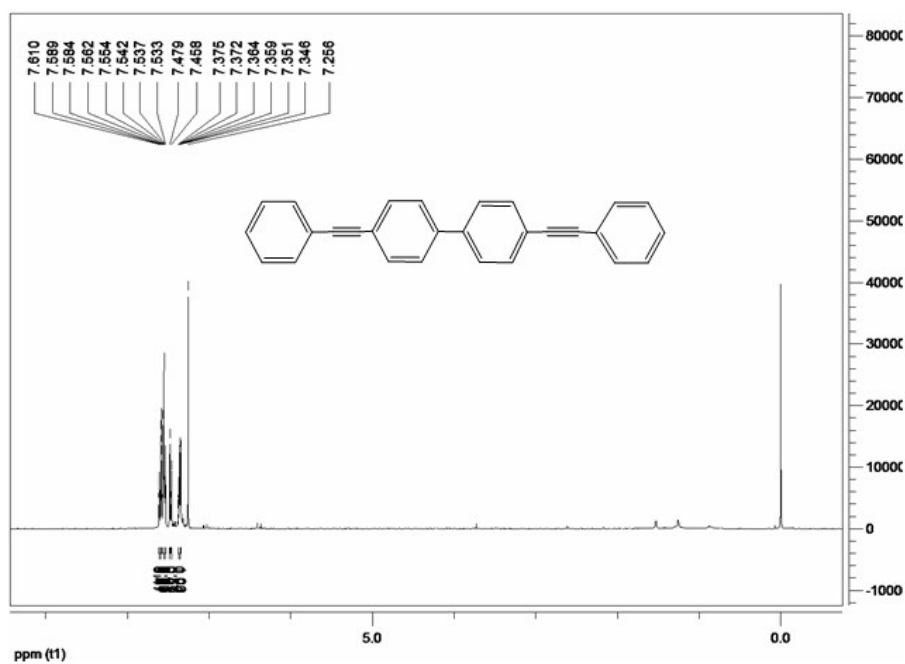

**Fig. S80** The  $^1\text{H}$  NMR (400 MHz,  $\text{CDCl}_3$ ) spectrum of 4,4'-bis(2-phenylethynyl)-1,1'-biphenyl (**4h**).

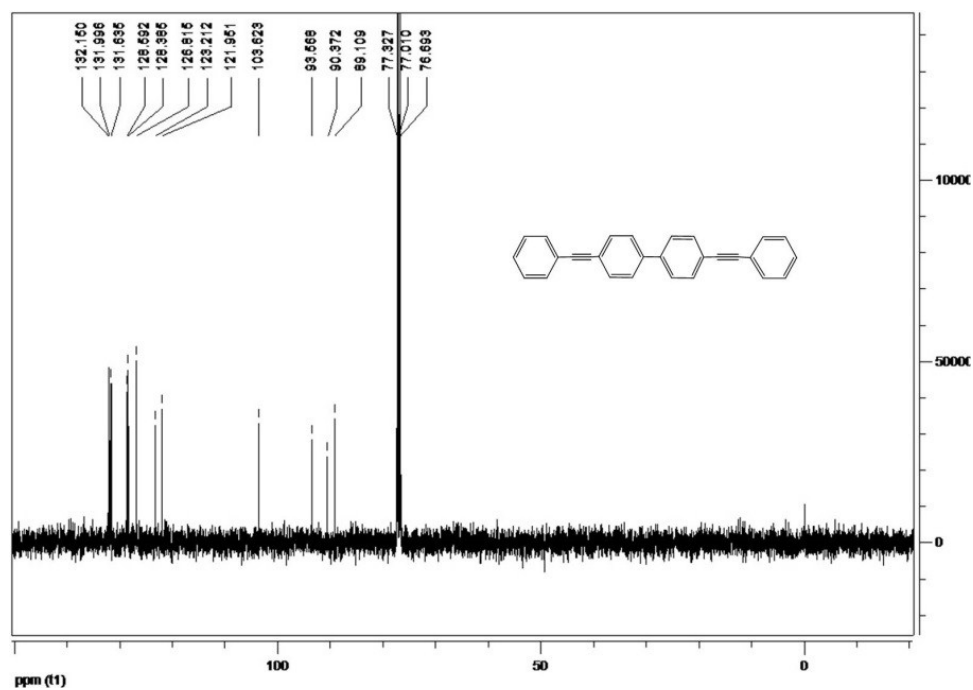

**Fig. S81** The  $^{13}\text{C}$  NMR (100 MHz,  $\text{CDCl}_3$ ) spectrum of 4,4'-bis(2-phenylethynyl)-1,1'-biphenyl (**4h**).

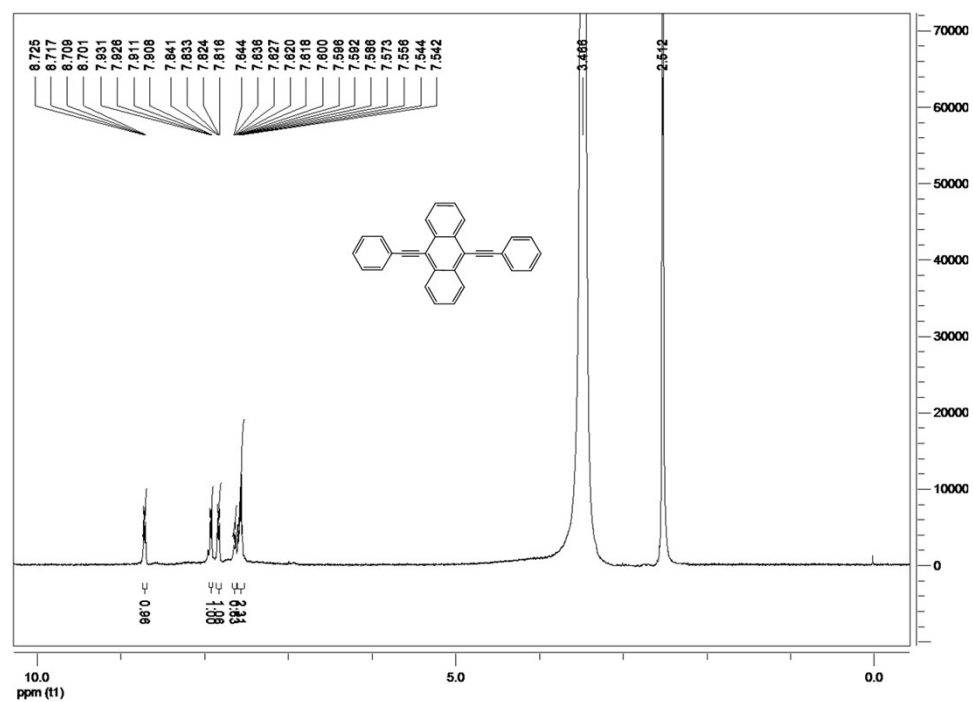

**Fig. S82** The  $^1\text{H}$  NMR (400 MHz,  $\text{DMSO}-d_6$ ) spectrum of 9,10-bis(2-phenylethynyl)anthracene (**4i**).



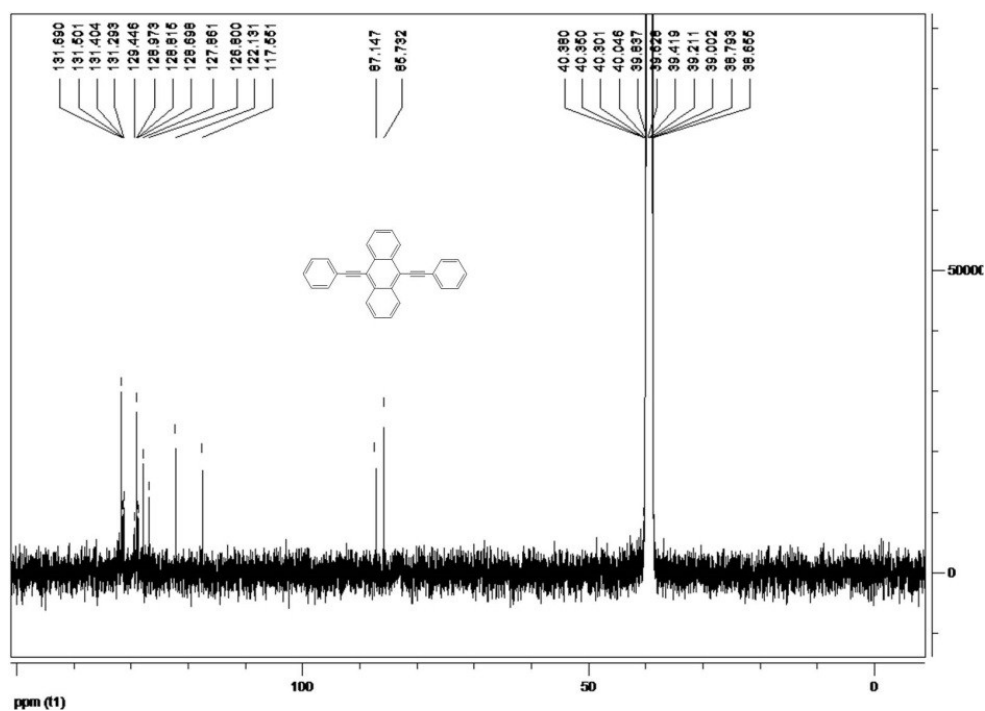

**Fig. S83** The  $^{13}\text{C}$  NMR (100 MHz,  $\text{DMSO-}d_6$ ) spectrum of 9,10-bis(2-phenylethynyl)anthracene (**4i**).

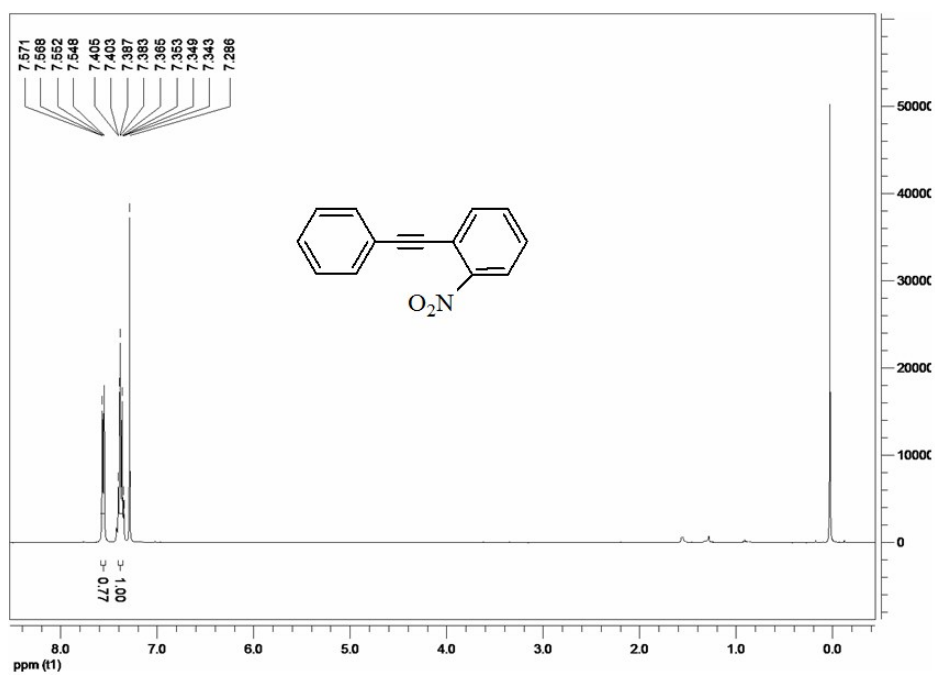

**Fig. S84** The  $^1\text{H}$  NMR (400 MHz,  $\text{CDCl}_3$ ) spectrum of (2-nitrophenyl)phenylacetylene (**4j**).

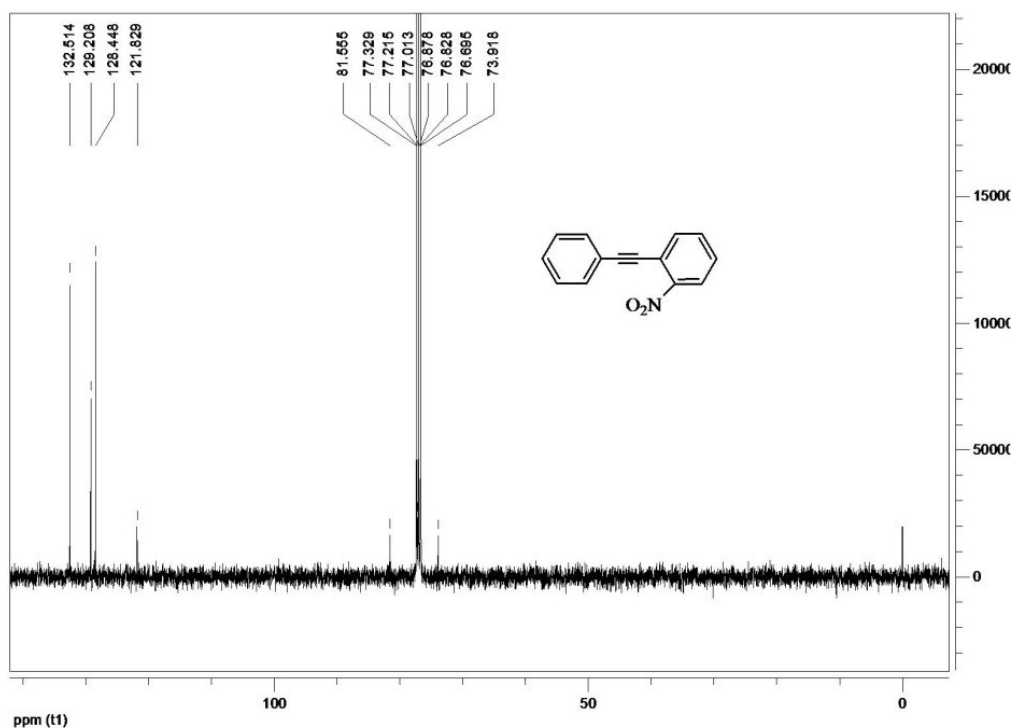

**Fig. S85** The  $^{13}\text{C}$  NMR (100 MHz,  $\text{CDCl}_3$ ) spectrum of (2-nitrophenyl)phenylacetylene (**4j**).

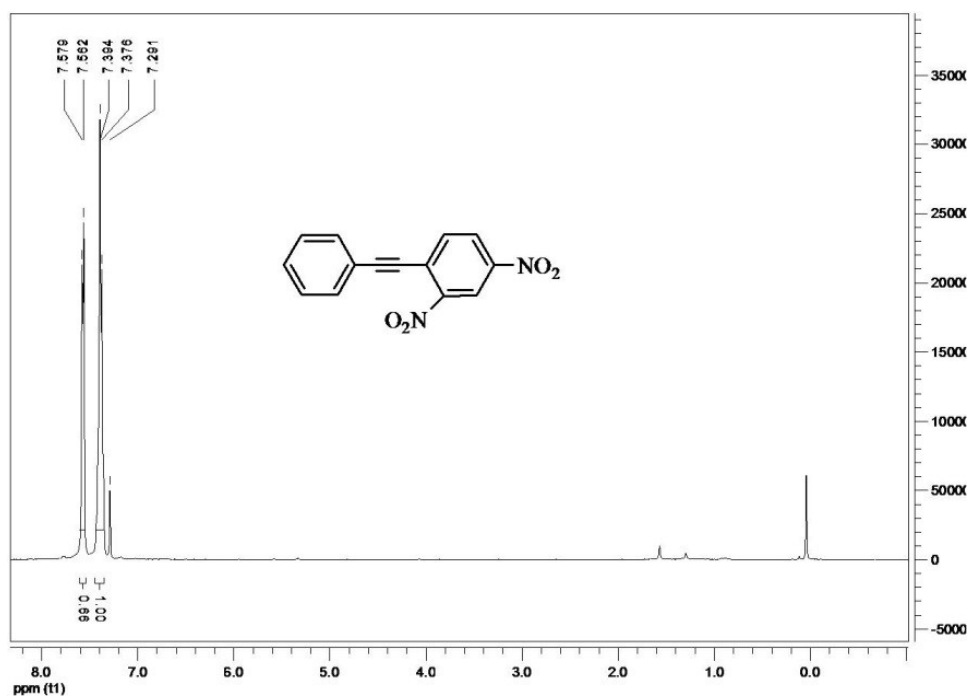

**Fig. S86** The  $^1\text{H}$  NMR (400 MHz,  $\text{CDCl}_3$ ) spectrum of 2,4-dinitro-1-(2-phenylethynyl)acetylene (**4k**).

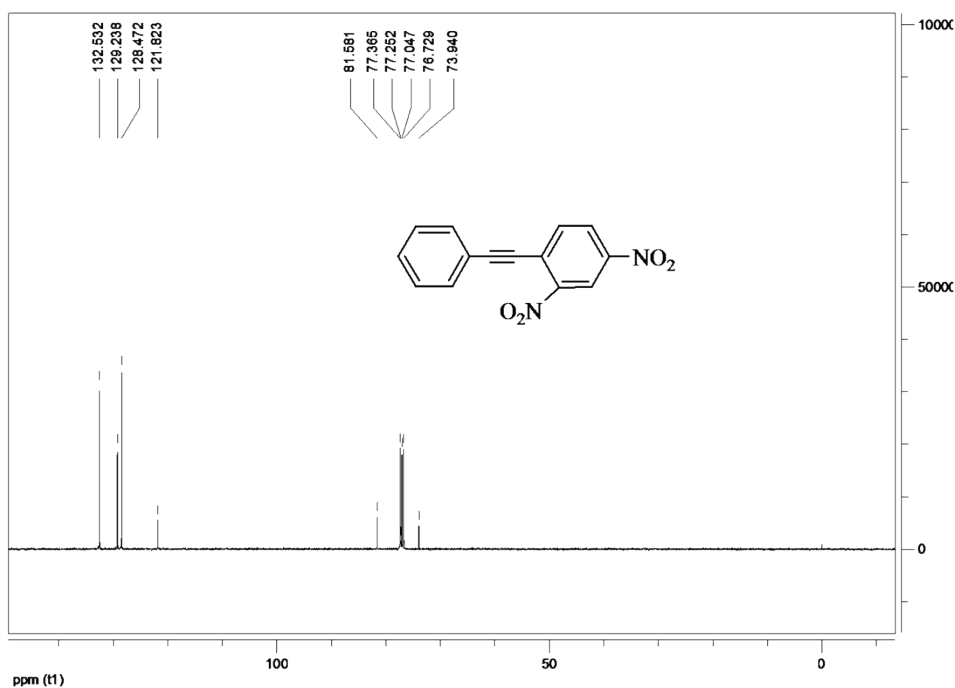

**Fig. S87** The <sup>13</sup>C NMR (100 MHz, CDCl<sub>3</sub>) spectrum of 2,4-dinitro-1-(2-phenylethynyl)acetylene (**4k**).

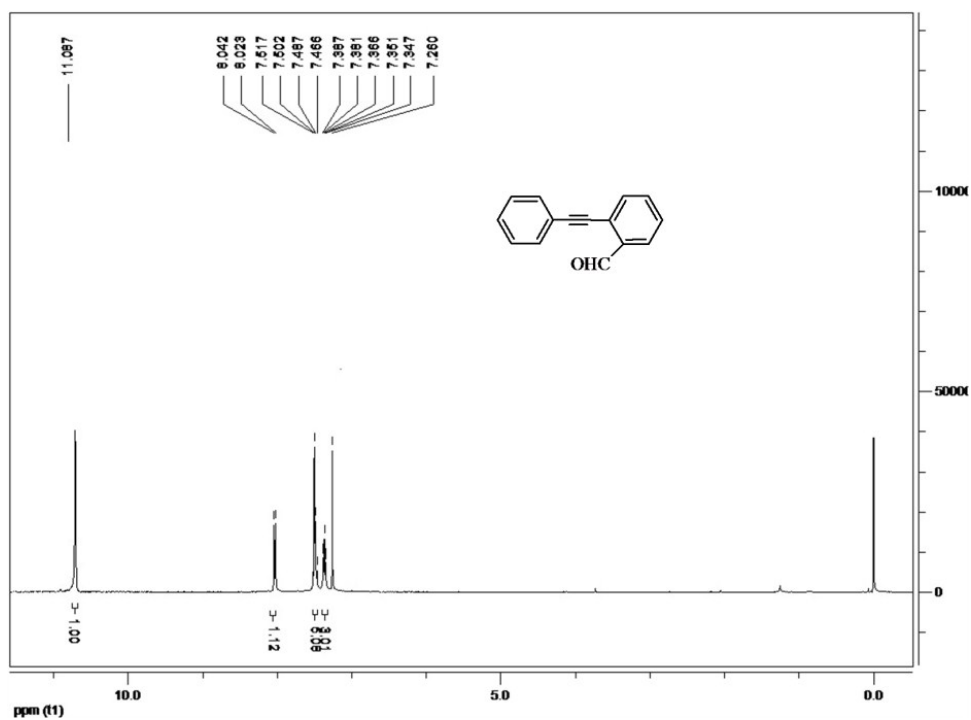

**Fig. S88** The <sup>1</sup>H NMR (400 MHz, CDCl<sub>3</sub>) spectrum of 2-(phenylethynyl)benzaldehyde (**4l**).

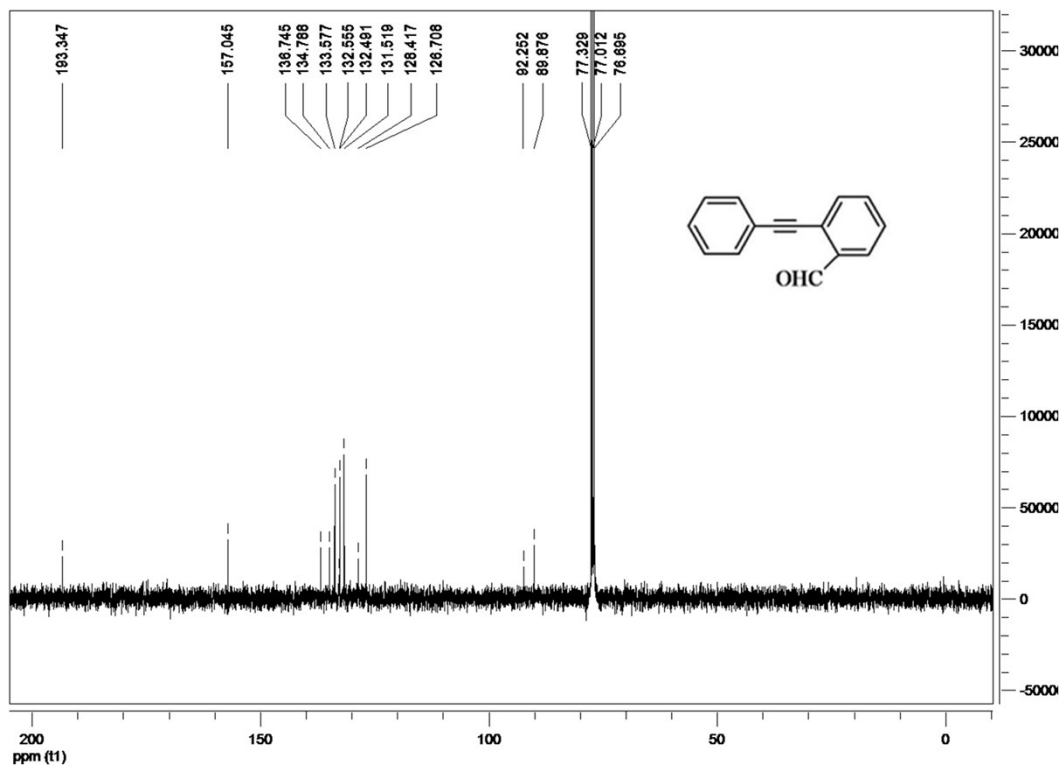

**Fig. S89** The  $^{13}\text{C}$  NMR (100 MHz,  $\text{CDCl}_3$ ) spectrum of 2-(phenylethynyl)benzaldehyde (**4I**).

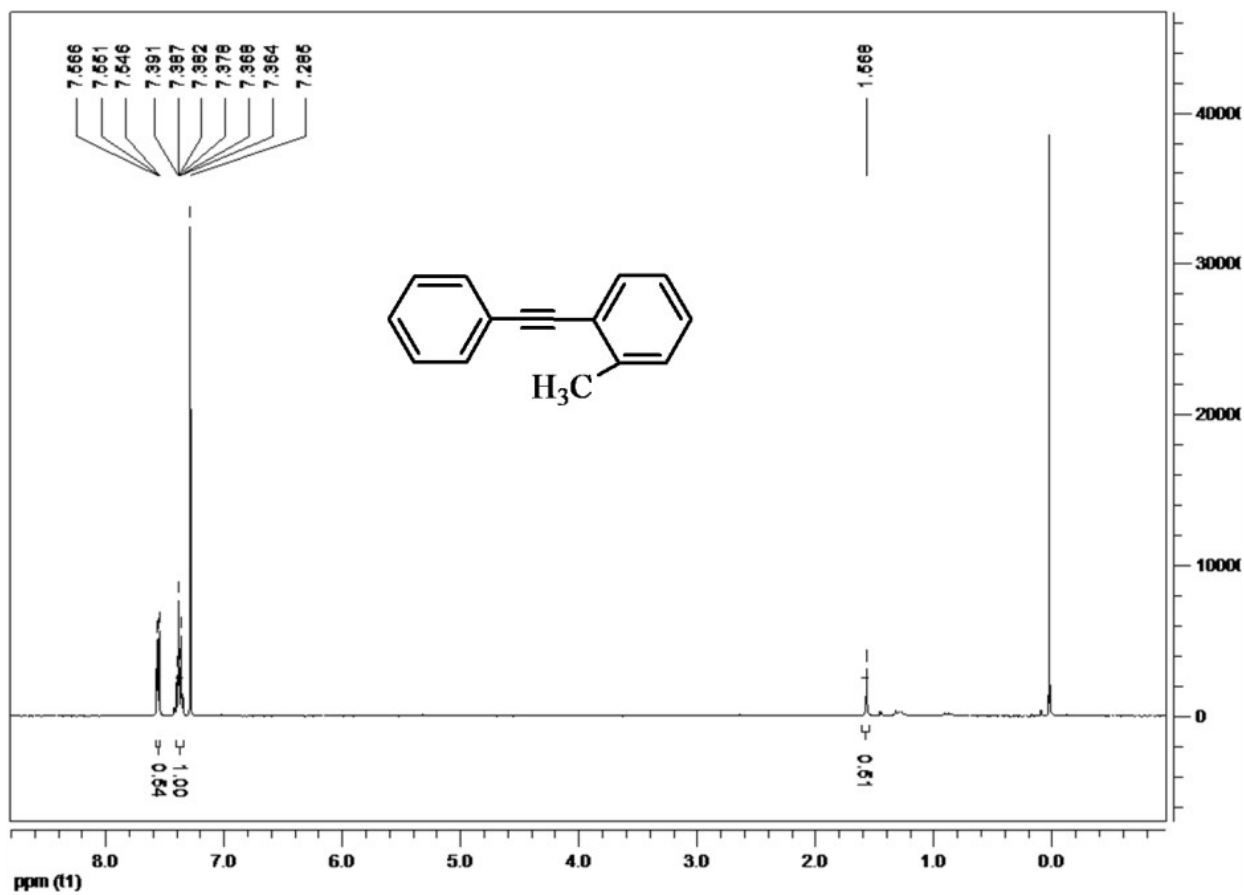

**Fig. S90** The  $^1\text{H}$  NMR (400 MHz,  $\text{CDCl}_3$ ) spectrum of 2-methylphenylacetylene (**4m**).

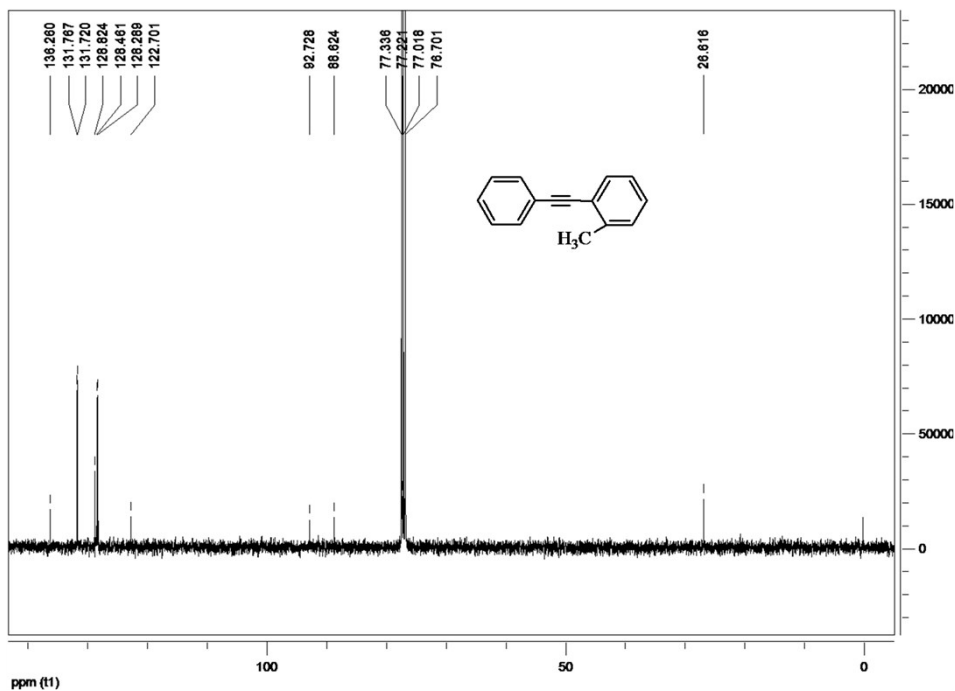

**Fig. S91** The  $^{13}\text{C}$  NMR (100 MHz,  $\text{CDCl}_3$ ) spectrum of 2-methylphenylacetylene (**4m**).

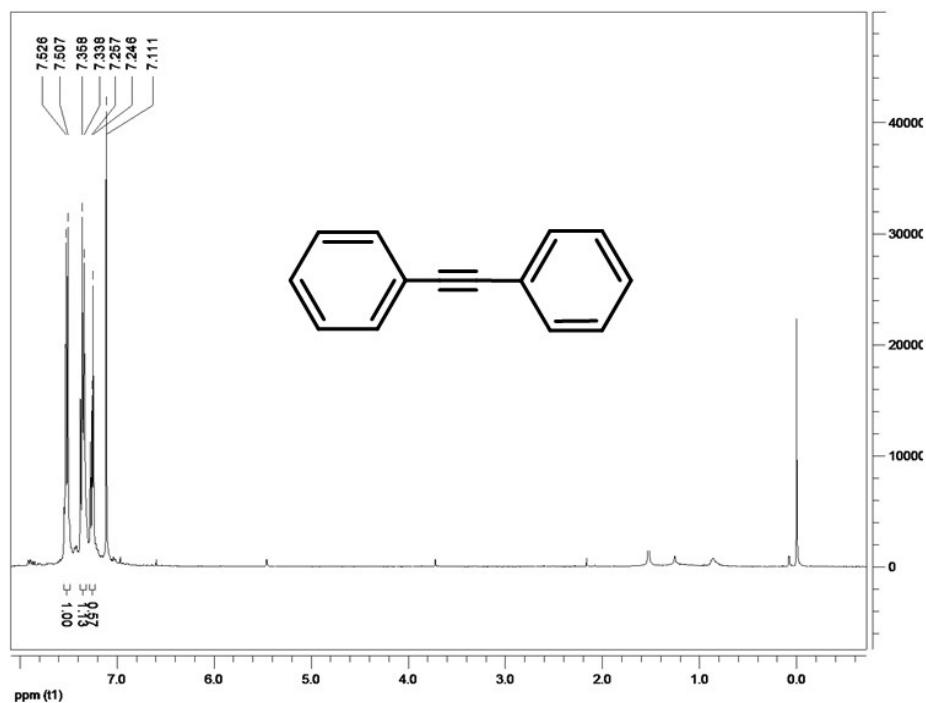

**Fig. S92** The  $^1\text{H}$  NMR (400 MHz,  $\text{CDCl}_3$ ) spectrum of diphenylacetylene (**4n**).

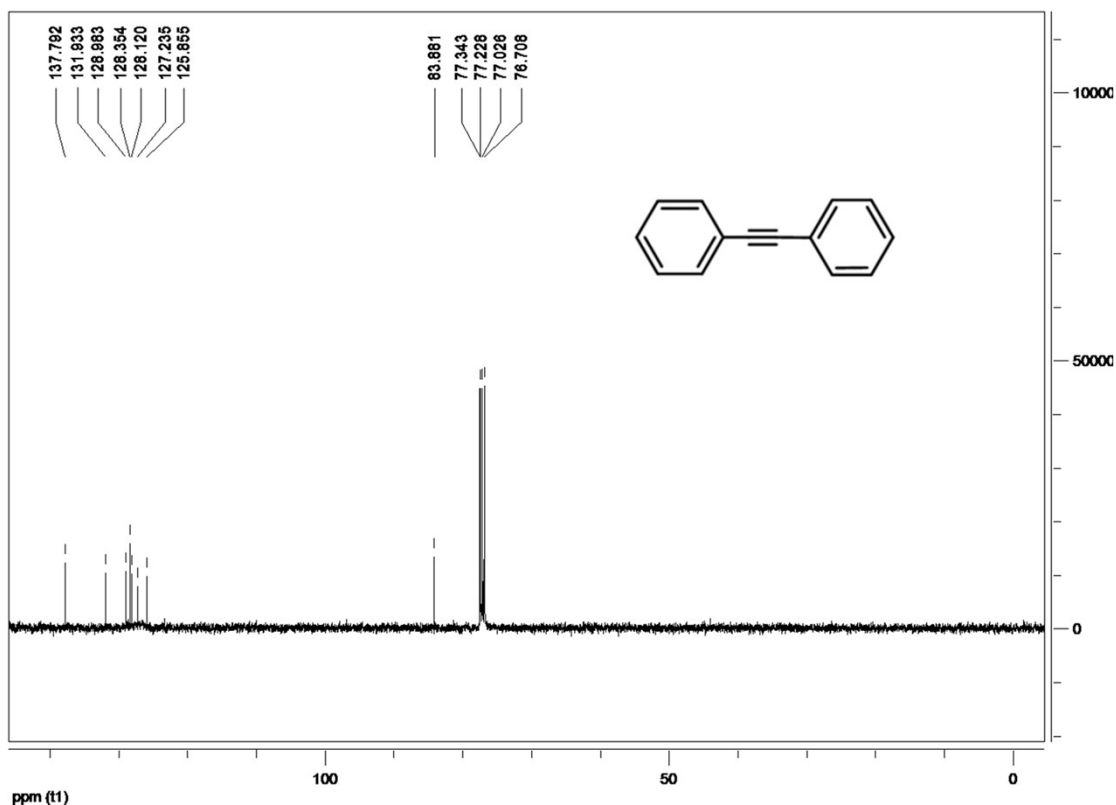

**Fig. S93** The  $^{13}\text{C}$  NMR (100 MHz,  $\text{CDCl}_3$ ) spectrum of diphenylacetylene (**4n**).

## References

- 1 E. Shirakawa, Y. Hayashi, K. Itoh, R. Watabe, N. Uchiyama, W. Konagaya, S. Masui and T. Hayashi, *Angew. Chem., Int. Ed.*, 2012, **51**, 218.
- 2 M. Jin and D. Lee, *Angew. Chem., Int. Ed.*, 2010, **49**, 1119.
- 3 R. J. Lundgren, B. D. Peters, P. G. Alsabeh and M. Stradiotto, *Angew. Chem.*, 2010, **122**, 4165.
- 4 K. Dhara, K. Sarkar, D. Srimani, S. K. Saha, P. Chattopadhyay and A. Bhaumik, *Dalton Trans.*, 2010, **39**, 6395.
- 5 C. C. Price, H. M. Shafer, M. F. Huber and C. Bernstein, *J. Org. Chem.*, 1942, **7**, 517.
- 6 S. K. Taylor, S. G. Bennett, K. J. Heinz and L. K. Lashley, *J. Org. Chem.*, 1981, **46**, 2194.
- 7 C. F. Koelsch, *J. Org. Chem.*, 1938, **3**, 456.
- 8 M. Planellas, R. Pleixats and A. Shafir, *Adv. Synth. Catal.*, 2012, **354**, 651.

- 9 E. Shirakawa, X. J. Zhang and T. Hayashi, *Angew. Chem., Int. Ed.*, 2011, **50**, 4671.
- 10 E. M. Crompton and F. D. Lewis, *Photochem. Photobiol. Sci.*, 2004, **3**, 660.
- 11 T. E. Barder, S. D. Walker, J. R. Martinelli and S. L. Buchwald, *J. Am. Chem. Soc.*, 2005, **127**, 4685.
- 12 J. D. Senra, L. F. B. Malta, M. E. H. M. da Costa, R. C. Michel, L. C. S. Aguiar, A. B. C. Simas and O. A. C. Antunes, *Adv. Synth. Catal.*, 2009, **351**, 2411.
- 13 J. Z. Zhang, W. Q. Zhang, Y. Wang and M. Zhang, *Adv. Synth. Catal.*, 2008, **350**, 2065.
- 14 V. K. Chaikovskii, A. N. Novikov and T. A. Sarycheva, *Zh. Org. Khim.*, 1985, **21**, 1947.
- 15 L. Q. You, H. Y. Wang and P. Lu, *Ying Yong Hua Gong*, 2008, **37**, 121.
- 16 T. Nakaya, T. Tomomoto and M. Imoto, *Bull. Chem. Soc. Jpn.*, 1966, **39**, 1551.
- 17 P. Ruggli, *Helvetica Chim. Acta*, 1937, **20**, 37.
- 18 E. Rafiee, A. Ataei, S. Nadri, M. Joshaghani and E. Sara, *Inorg. Chim. Acta*, 2014, **409**, 302.
- 19 W. Zhang, F. Ning, L. Váradi, D. E. Hibbs, J. A. Platts, M. Nyerges, R. J. Anderson, and W. Paul, *Tetrahedron*, 2014, **70**, 3621.
- 20 F. Yang and Y. J. Wu, *Eur. J. Org. Chem.*, 2007, **21**, 3476.
- 21 H. Kim and P. H. Lee, *Adv. Synth. Catal.*, 2009, **351**, 2827.
- 22 C. H. Lin, Y. J. Wang and C. F. Lee, *Eur. J. Org. Chem.*, 2010, **23**, 4368.
- 23 H. F. Chow, C. W. Wan, K. H. Low and Y. Y. Yeung, *J. Org. Chem.*, 2001, **66**, 1910.
- 24 N. Kakusawa, K. Yamaguchi and J. Kurita, *J. Organomet. Chem.*, 2005, **690**, 2956.
- 25 D. P. Lydon, L. Porres, A. Beeby, T. B. Marder and P. J. Low, *New J. Chem.*, 2005, **29**, 972.
- 26 D. Kang, D. Eom, H. Kim and P. H. Lee, *Eur. J. Org. Chem.*, 2010, **12**, 2330.
- 27 M. J. Jin and D. H. Lee, *Angew. Chem., Int. Ed.*, 2010, **49**, 1119.
- 28 B. Prüger, G. E. Hofmeister, C. B. Jacobsen, D. G. Alberg, M. Nielsen and K. A. Jørgensen, *Chem. Eur. J.*, 2010, **16**, 3783.
- 29 C. J. Charles, J. B. Loh, R. Gerhard and E. Dieter, *Chem. Eur. J.*, 2011, **17**, 13409.

30 Y. Lee, M. C. Hong, H. Ahn, J. Yu and R. Hakjune, *J. Organomet. Chem.*, 2014,  
**769**, 80.
